# Supplementary material for: Dichloroacetyl Amides of 3,5-Bis(benzylidene)-4-piperidones Displaying Greater Toxicity to Neoplasms than to Non-Malignant Cells
Source: MDPI journal article supplement (doi:10.3390/medicines9060035), 2022-06-08
Supplement: s1 [file s1]

## SUPPLEMENTAL SECTION

---

### **Dichloroacetyl amides of 3,5-bis(benzylidene)-4-piperidones displaying greater toxicity to neoplasms than non-malignant cells**

Mohammad Hossain <sup>a</sup>, Praveen K. Roayapalley <sup>b,\*</sup>, Hiroshi Sakagami <sup>c</sup>, Keitaro Satoh <sup>c</sup>, Kenjiro Bandow <sup>c</sup>, Umashankar Das <sup>b</sup>, Jonathan R. Dimmock <sup>b</sup>

<sup>a</sup> *School of Sciences, Indiana University Kokomo, Kokomo, IN 46904, USA*

<sup>b</sup> *Drug Discovery and Development Research Cluster, University of Saskatchewan, Saskatoon, Saskatchewan S7N 5E5, Canada*

<sup>c</sup> *Meikai University Research Institute of Odontology, Sakado, Saitama 350-0283, Japan*

\*Corresponding author: E-mail : [rpraveen.sp@usask.ca](mailto:rpraveen.sp@usask.ca) Tel.: +1-306-715-4217

## Contents

|                                                                                                                                                                                  |    |
|----------------------------------------------------------------------------------------------------------------------------------------------------------------------------------|----|
| <sup>1</sup> H NMR ((CDCl <sub>3</sub> ) spectrum of (3 <i>E</i> ,5 <i>E</i> )-3,5-dibenzylidene-1-(2,2-dichloroacetyl)piperidin-4-one ( <b>1a</b> ) .....                       | 4  |
| <sup>13</sup> C NMR (CDCl <sub>3</sub> ) spectrum of (3 <i>E</i> ,5 <i>E</i> )-3,5-dibenzylidene-1-(2,2-dichloroacetyl)piperidin-4-one ( <b>1a</b> ) .....                       | 5  |
| Mass spectrum of (3 <i>E</i> ,5 <i>E</i> )-3,5-dibenzylidene-1-(2,2-dichloroacetyl)piperidin-4-one ( <b>1a</b> ) .....                                                           | 6  |
| <sup>1</sup> H NMR (CDCl <sub>3</sub> ) spectrum of 1-(2,2-dichloroacetyl)-3,5-bis(( <i>E</i> )-4-fluorobenzylidene)piperidin-4-one ( <b>1b</b> ) .....                          | 7  |
| <sup>13</sup> C NMR (CDCl <sub>3</sub> ) spectrum of 1-(2,2-dichloroacetyl)-3,5-bis(( <i>E</i> )-4-fluorobenzylidene)piperidin-4-one ( <b>1b</b> ) .....                         | 8  |
| Mass spectrum of 1-(2,2-dichloroacetyl)-3,5-bis(( <i>E</i> )-4-fluorobenzylidene)piperidin-4-one ( <b>1b</b> ) .....                                                             | 9  |
| <sup>1</sup> H NMR (CDCl <sub>3</sub> ) spectrum of 1-(2,2-dichloroacetyl)-3,5-bis(( <i>E</i> )-3,4-difluorobenzylidene)piperidin-4-one ( <b>1c</b> ).....                       | 10 |
| <sup>13</sup> C NMR (CDCl <sub>3</sub> ) spectrum of 1-(2,2-dichloroacetyl)-3,5-bis(( <i>E</i> )-3,4-difluorobenzylidene)piperidin-4-one ( <b>1c</b> ).....                      | 11 |
| Mass spectrum of 1-(2,2-dichloroacetyl)-3,5-bis(( <i>E</i> )-3,4-difluorobenzylidene)piperidin-4-one ( <b>1c</b> ).....                                                          | 12 |
| <sup>1</sup> H NMR (CDCl <sub>3</sub> ) spectrum of 3,5-bis(( <i>E</i> )-4-chlorobenzylidene)-1-(2,2-dichloroacetyl)piperidin-4-one ( <b>1d</b> ).....                           | 13 |
| <sup>13</sup> C NMR (CDCl <sub>3</sub> ) spectrum of 3,5-bis(( <i>E</i> )-4-chlorobenzylidene)-1-(2,2-dichloroacetyl)piperidin-4-one ( <b>1d</b> ).....                          | 14 |
| Mass spectrum of 3,5-bis(( <i>E</i> )-4-chlorobenzylidene)-1-(2,2-dichloroacetyl)piperidin-4-one ( <b>1d</b> ).....                                                              | 15 |
| <sup>1</sup> H NMR (CDCl <sub>3</sub> ) spectrum of 1-(2,2-dichloroacetyl)-3,5-bis(( <i>E</i> )-3,4-dichlorobenzylidene)piperidin-4-one ( <b>1e</b> ) .....                      | 16 |
| <sup>13</sup> C NMR (CDCl <sub>3</sub> ) spectrum of 1-(2,2-dichloroacetyl)-3,5-bis(( <i>E</i> )-3,4-dichlorobenzylidene)piperidin-4-one ( <b>1e</b> ) .....                     | 17 |
| Mass spectrum of 1-(2,2-dichloroacetyl)-3,5-bis(( <i>E</i> )-3,4-dichlorobenzylidene)piperidin-4-one ( <b>1e</b> ) .....                                                         | 18 |
| <sup>1</sup> H NMR (CDCl <sub>3</sub> ) spectrum of 1-(2,2-dichloroacetyl)-3,5-bis(( <i>E</i> )-4-methoxybenzylidene)piperidin-4-one ( <b>1f</b> ) .....                         | 19 |
| <sup>13</sup> C NMR (CDCl <sub>3</sub> ) spectrum of 1-(2,2-dichloroacetyl)-3,5-bis(( <i>E</i> )-4-methoxybenzylidene)piperidin-4-one ( <b>1f</b> ) .....                        | 20 |
| Mass spectrum of 1-(2,2-dichloroacetyl)-3,5-bis(( <i>E</i> )-4-methoxybenzylidene)piperidin-4-one ( <b>1f</b> ) .....                                                            | 21 |
| <sup>1</sup> H NMR ((CD <sub>3</sub> ) <sub>2</sub> SO) spectrum of 1-(2,2-dichloroacetyl)-3,5-bis(( <i>E</i> )-3,4-dimethoxybenzylidene)piperidin-4-one ( <b>1g</b> ).....      | 22 |
| <sup>13</sup> C NMR ((CD <sub>3</sub> ) <sub>2</sub> SO) spectrum of 1-(2,2-dichloroacetyl)-3,5-bis(( <i>E</i> )-3,4-dimethoxybenzylidene)piperidin-4-one ( <b>1g</b> ).....     | 23 |
| Mass spectrum of 1-(2,2-dichloroacetyl)-3,5-bis(( <i>E</i> )-3,4-dimethoxybenzylidene)piperidin-4-one ( <b>1g</b> ) .....                                                        | 24 |
| <sup>1</sup> H NMR ((CD <sub>3</sub> ) <sub>2</sub> SO) spectrum of 1-(2,2-dichloroacetyl)-3,5-bis(( <i>E</i> )-3,4,5-trimethoxybenzylidene)piperidin-4-one ( <b>1h</b> ) .....  | 25 |
| <sup>13</sup> C NMR ((CD <sub>3</sub> ) <sub>2</sub> SO) spectrum of 1-(2,2-dichloroacetyl)-3,5-bis(( <i>E</i> )-3,4,5-trimethoxybenzylidene)piperidin-4-one ( <b>1h</b> ) ..... | 26 |
| Mass spectrum of 1-(2,2-dichloroacetyl)-3,5-bis(( <i>E</i> )-3,4,5-trimethoxybenzylidene)piperidin-4-one ( <b>1h</b> ).....                                                      | 27 |

|                                                                                                                                                                                    |    |
|------------------------------------------------------------------------------------------------------------------------------------------------------------------------------------|----|
| <sup>1</sup> H NMR ((CD <sub>3</sub> ) <sub>2</sub> SO) spectrum of 1-(2,2-dichloroacetyl)-3,5-bis(( <i>E</i> )-3,4-methylenedioxybenzylidene)piperidin-4-one ( <b>1i</b> ) .....  | 28 |
| <sup>13</sup> C NMR ((CD <sub>3</sub> ) <sub>2</sub> SO) spectrum of 1-(2,2-dichloroacetyl)-3,5-bis(( <i>E</i> )-3,4-methylenedioxybenzylidene)piperidin-4-one ( <b>1i</b> ) ..... | 29 |
| Mass spectrum of 1-(2,2-dichloroacetyl)-3,5-bis(( <i>E</i> )-3,4-methylenedioxybenzylidene)piperidin-4-one ( <b>1i</b> ).....                                                      | 30 |
| <sup>1</sup> H NMR (CDCl <sub>3</sub> ) spectrum of 1-(2,2-dichloroacetyl)-3,5-bis(( <i>E</i> )-4-methylbenzylidene)piperidin-4-one ( <b>1j</b> ) .....                            | 31 |
| <sup>13</sup> C NMR (CDCl <sub>3</sub> ) spectrum of 1-(2,2-dichloroacetyl)-3,5-bis(( <i>E</i> )-4-methylbenzylidene)piperidin-4-one ( <b>1j</b> ) .....                           | 32 |
| Mass spectrum of 1-(2,2-dichloroacetyl)-3,5-bis(( <i>E</i> )-4-methylbenzylidene)piperidin-4-one ( <b>1j</b> ) .....                                                               | 33 |
| <sup>1</sup> H NMR ((CD <sub>3</sub> ) <sub>2</sub> SO) spectrum of 1-(2,2-dichloroacetyl)-3,5-bis(( <i>E</i> )-4-nitrobenzylidene)piperidin-4-one ( <b>1k</b> ) .....             | 34 |
| <sup>13</sup> C NMR ((CD <sub>3</sub> ) <sub>2</sub> SO) spectrum of 1-(2,2-dichloroacetyl)-3,5-bis(( <i>E</i> )-4-nitrobenzylidene)piperidin-4-one ( <b>1k</b> ) .....            | 35 |
| Mass spectrum of 1-(2,2-dichloroacetyl)-3,5-bis(( <i>E</i> )-4-nitrobenzylidene)piperidin-4-one ( <b>1k</b> ).....                                                                 | 36 |
| <sup>1</sup> H NMR (CDCl <sub>3</sub> ) spectrum of 1-(2,2-dichloroacetyl)-3,5-bis(( <i>E</i> )-4-(dimethylamino)benzylidene)piperidin-4-one ( <b>1l</b> ) .....                   | 37 |
| <sup>13</sup> C NMR (CDCl <sub>3</sub> ) spectrum of 1-(2,2-dichloroacetyl)-3,5-bis(( <i>E</i> )-4-(dimethylamino)benzylidene)piperidin-4-one ( <b>1l</b> ) .....                  | 38 |
| Mass spectrum of 1-(2,2-dichloroacetyl)-3,5-bis(( <i>E</i> )-4-(dimethylamino)benzylidene)piperidin-4-one ( <b>1l</b> ) .....                                                      | 39 |
| <sup>1</sup> H NMR ((CD <sub>3</sub> ) <sub>2</sub> SO) spectrum of 3,5-di(( <i>E</i> )-benzylidene)piperidin-4-one ( <b>2a</b> ) .....                                            | 40 |
| <sup>13</sup> C NMR ((CD <sub>3</sub> ) <sub>2</sub> SO) spectrum of 3,5-di(( <i>E</i> )-benzylidene)piperidin-4-one ( <b>2a</b> ) .....                                           | 41 |
| Mass spectrum of 3,5-di(( <i>E</i> )-benzylidene)piperidin-4-one ( <b>2a</b> ).....                                                                                                | 42 |
| <sup>1</sup> H NMR ((CD <sub>3</sub> ) <sub>2</sub> SO) of 1-acetyl-3,5-di(( <i>E</i> )-benzylidene)piperidin-4-one ( <b>2b</b> ).....                                             | 43 |
| <sup>13</sup> C NMR ((CD <sub>3</sub> ) <sub>2</sub> SO) spectrum of 1-acetyl-3,5-di(( <i>E</i> )-benzylidene)piperidin-4-one ( <b>2b</b> ).....                                   | 44 |
| Mass spectrum of 1-acetyl-3,5-di(( <i>E</i> )-benzylidene)piperidin-4-one ( <b>2b</b> ) .....                                                                                      | 45 |

$^1\text{H}$  NMR ( $\text{CDCl}_3$ ) spectrum of (3*E*,5*E*)-3,5-dibenzylidene-1-(2,2-dichloroacetyl)piperidin-4-one (**1a**)

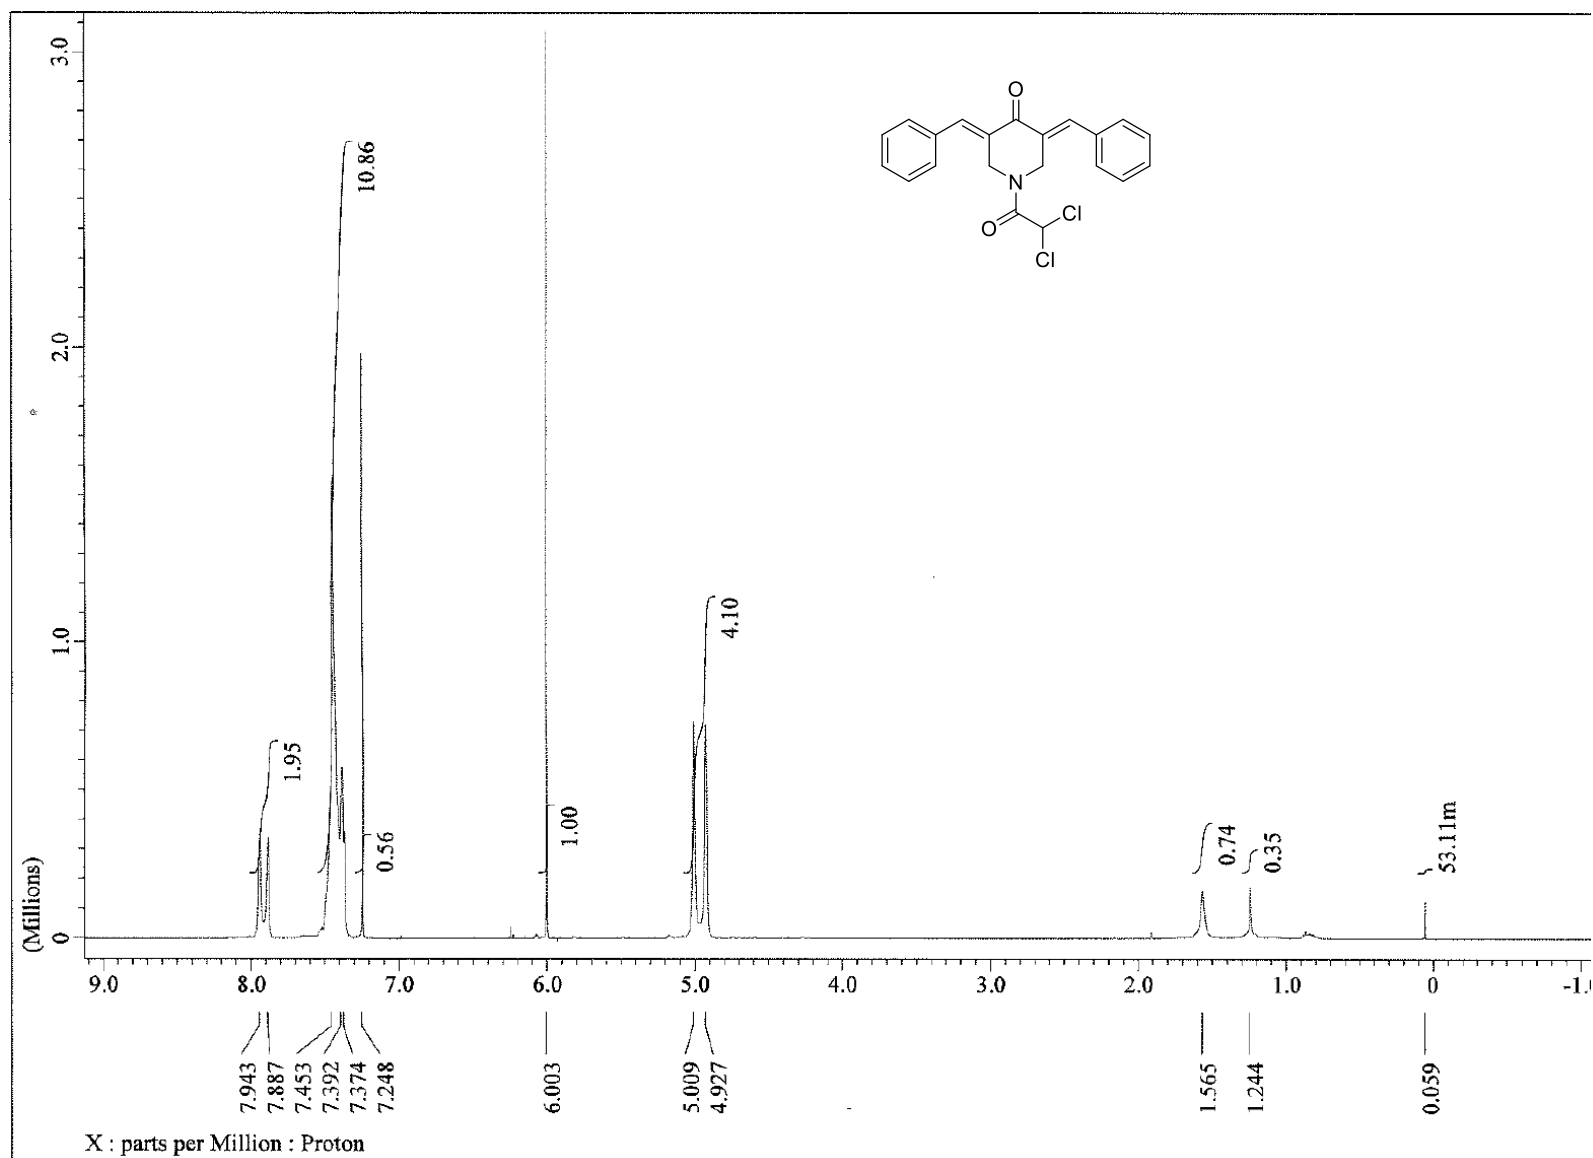

$^{13}\text{C}$  NMR ( $\text{CDCl}_3$ ) spectrum of (3E,5E)-3,5-dibenzylidene-1-(2,2-dichloroacetyl)piperidin-4-one (**1a**)

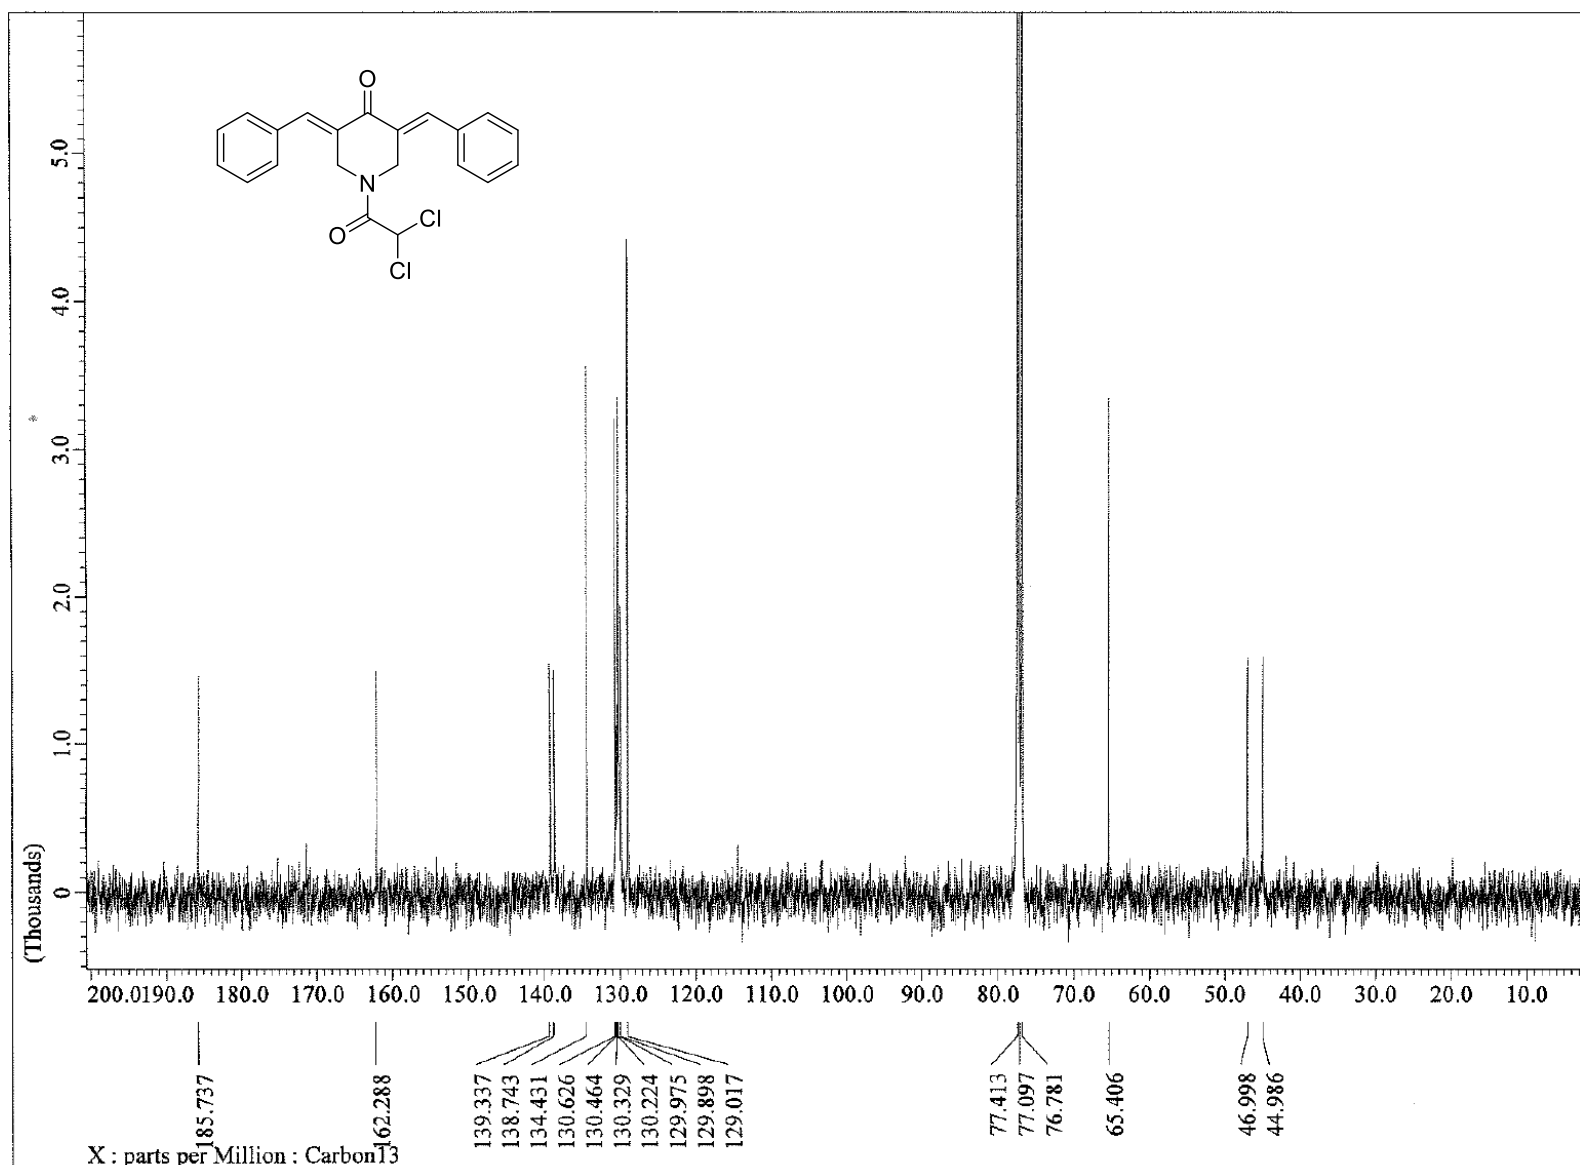

Mass spectrum of (3*E*,5*E*)-3,5-dibenzylidene-1-(2,2-dichloroacetyl)piperidin-4-one (**1a**)

Acq. Data Name: NC2603

Creation Parameters: Average(MS Time:0.20..0.24)

Experiment Date/Time: 2/20/2019 1:35:58 PM

Ionization Mode: FD+(eIFI)

$\times 10^3$  Intensity (86056)

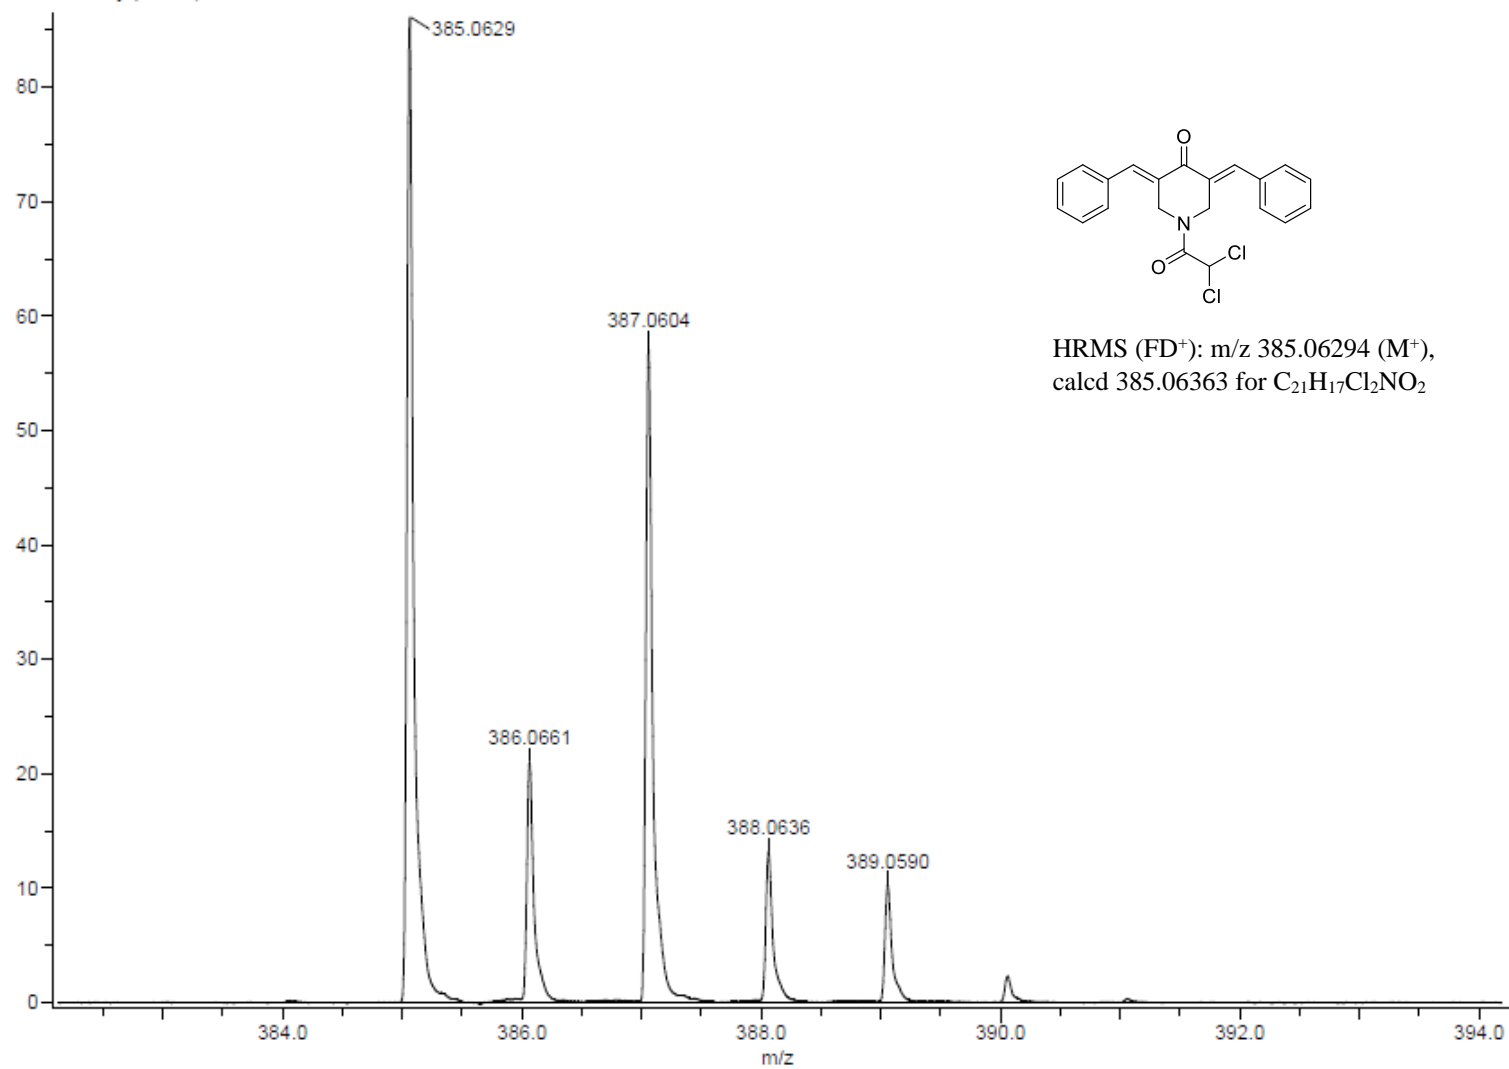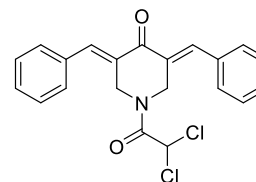

HRMS (FD<sup>+</sup>): m/z 385.06294 (M<sup>+</sup>),  
calcd 385.06363 for C<sub>21</sub>H<sub>17</sub>Cl<sub>2</sub>NO<sub>2</sub>

$^1\text{H}$  NMR ( $\text{CDCl}_3$ ) spectrum of 1-(2,2-dichloroacetyl)-3,5-bis((*E*)-4-fluorobenzylidene)piperidin-4-one (**1b**)

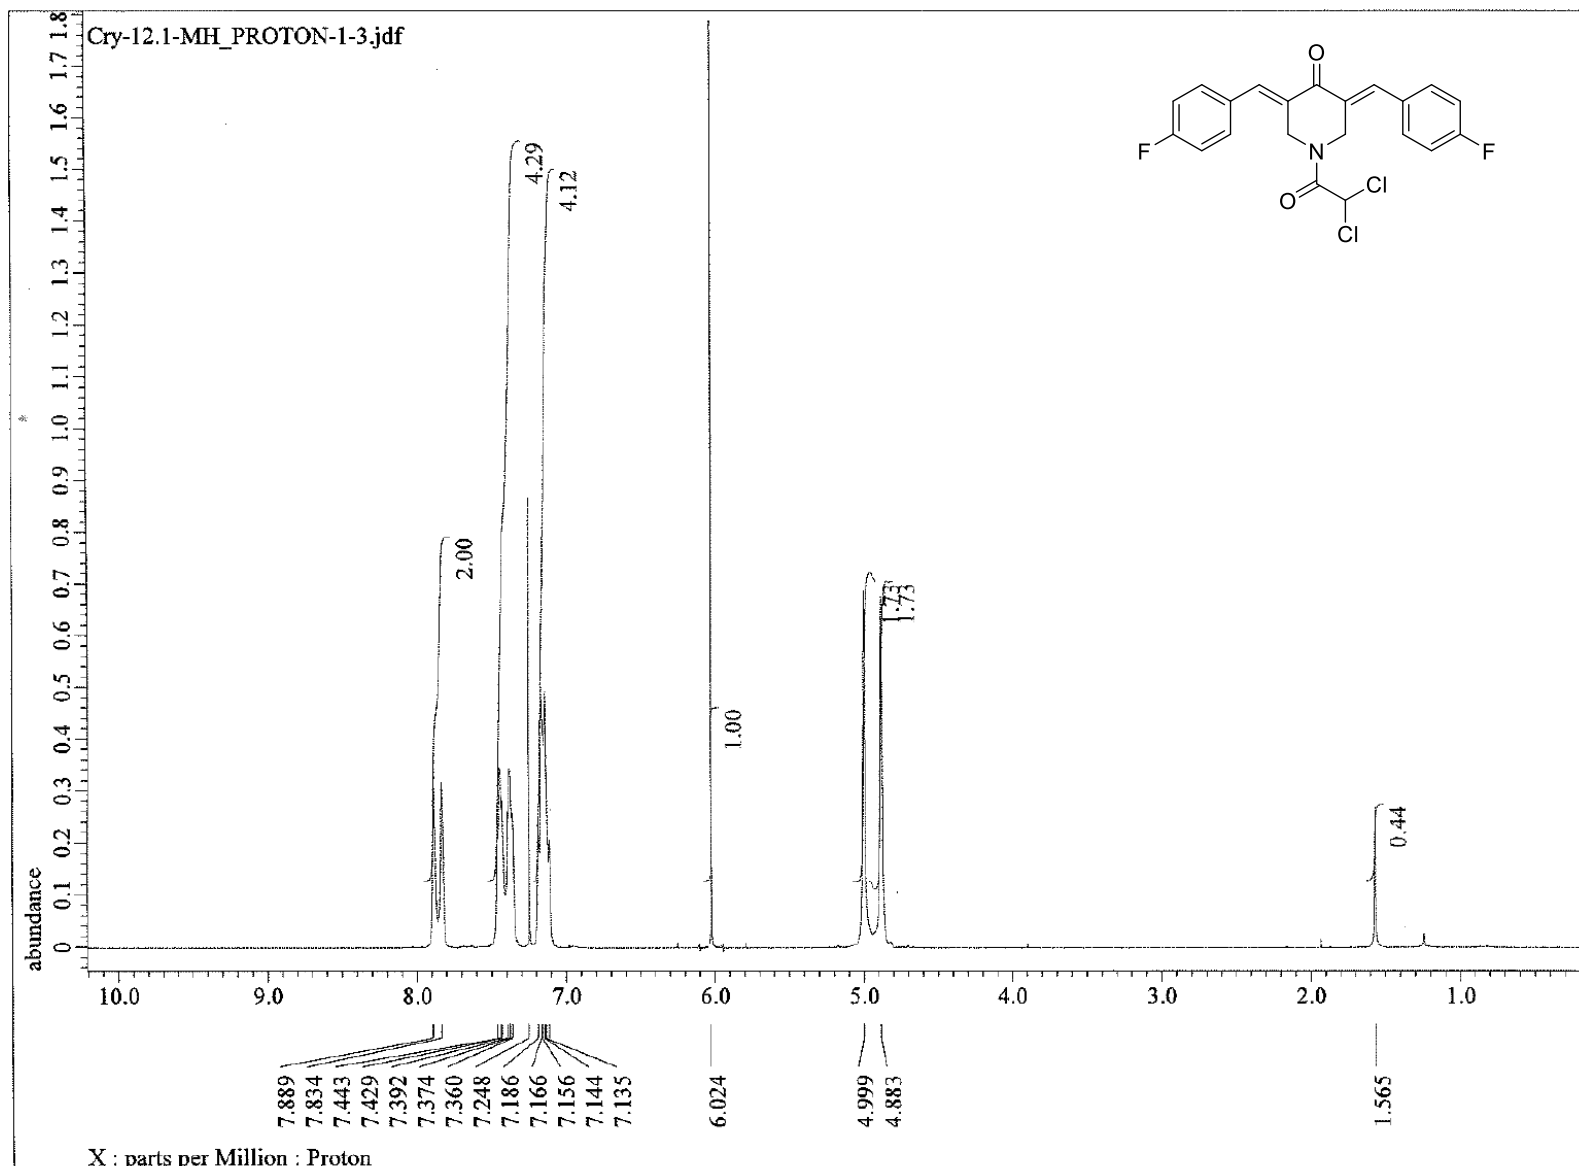

$^{13}\text{C}$  NMR ( $\text{CDCl}_3$ ) spectrum of 1-(2,2-dichloroacetyl)-3,5-bis((*E*)-4-fluorobenzylidene)piperidin-4-one (**1b**)

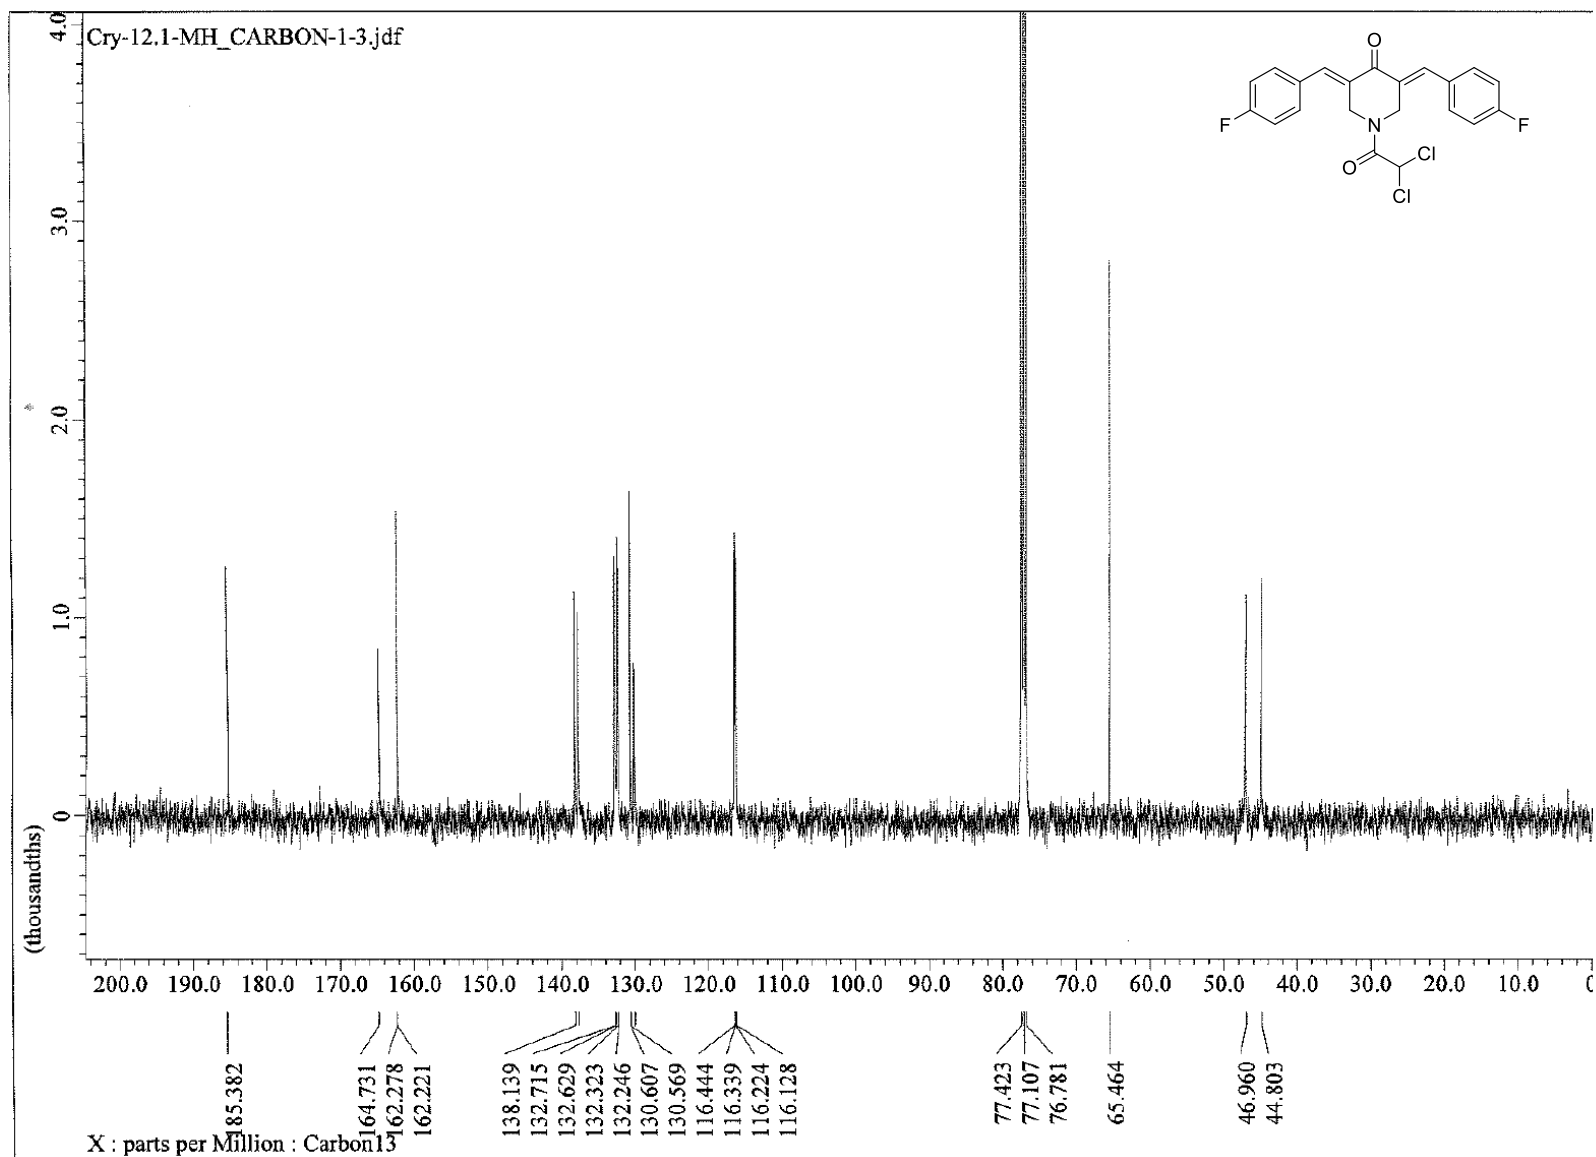



Mass spectrum of 1-(2,2-dichloroacetyl)-3,5-bis((*E*)-4-fluorobenzylidene)piperidin-4-one (**1b**)

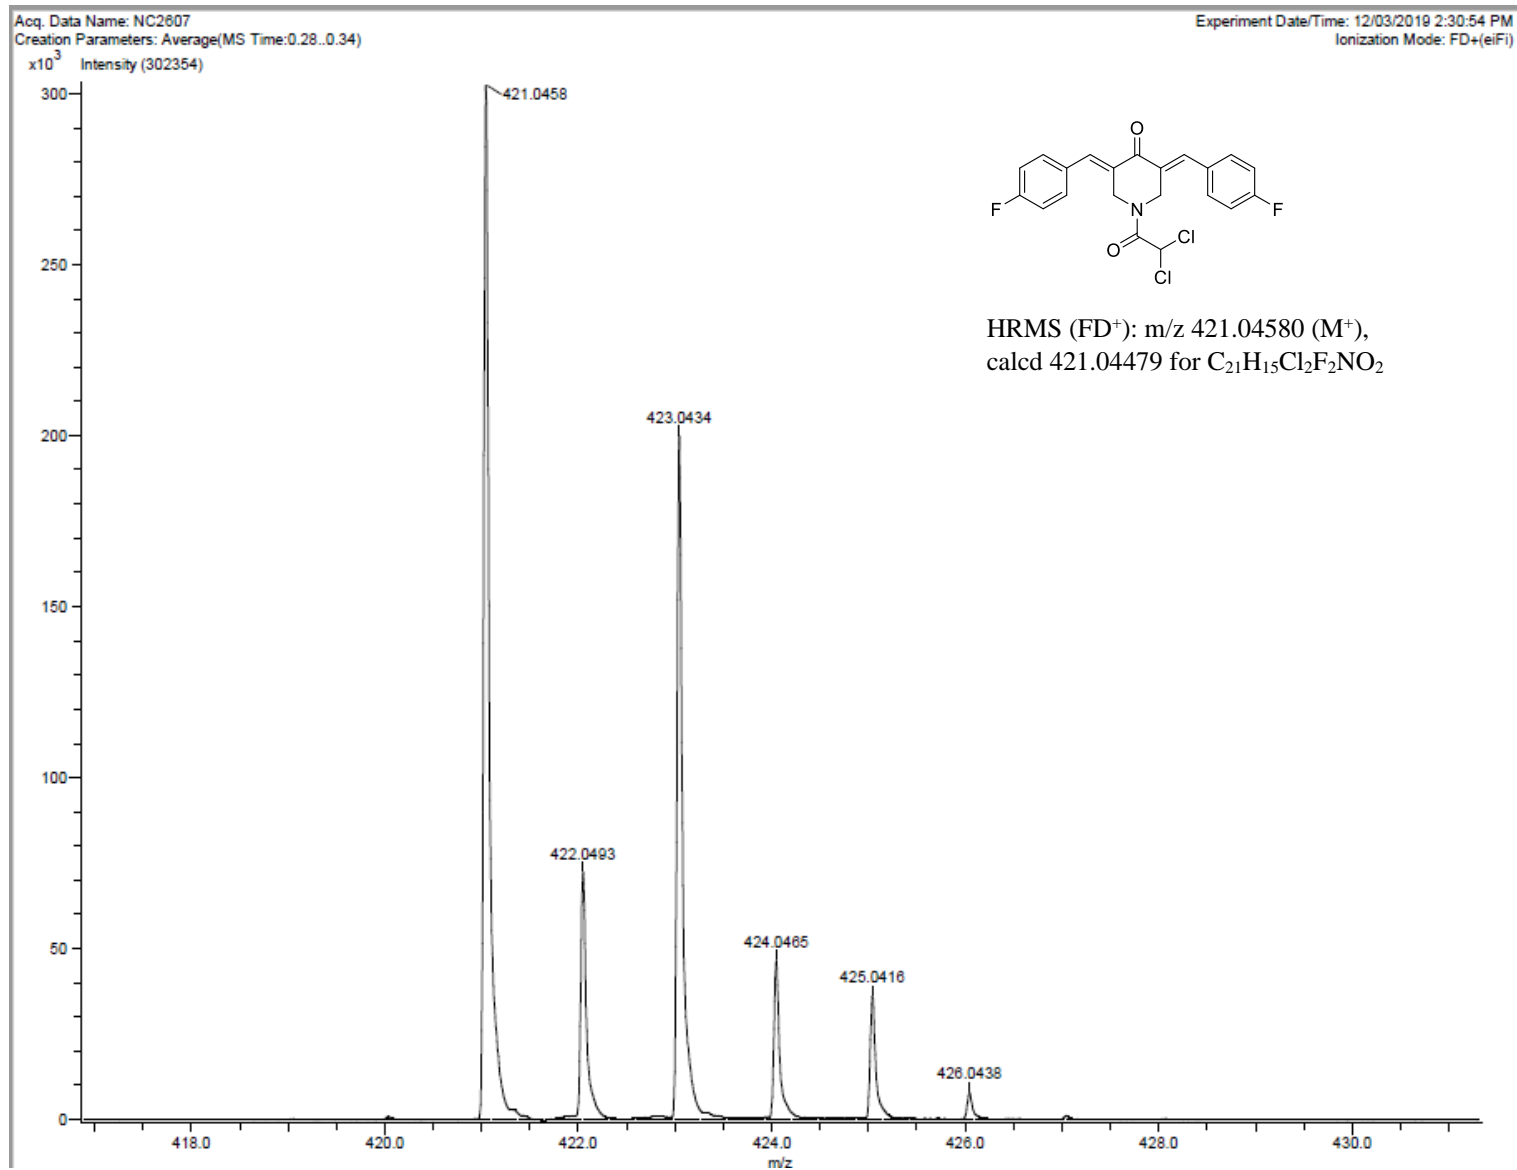

<sup>1</sup>H NMR (CDCl<sub>3</sub>) spectrum of 1-(2,2-dichloroacetyl)-3,5-bis((*E*)-3,4-difluorobenzylidene)piperidin-4-one (**1c**)

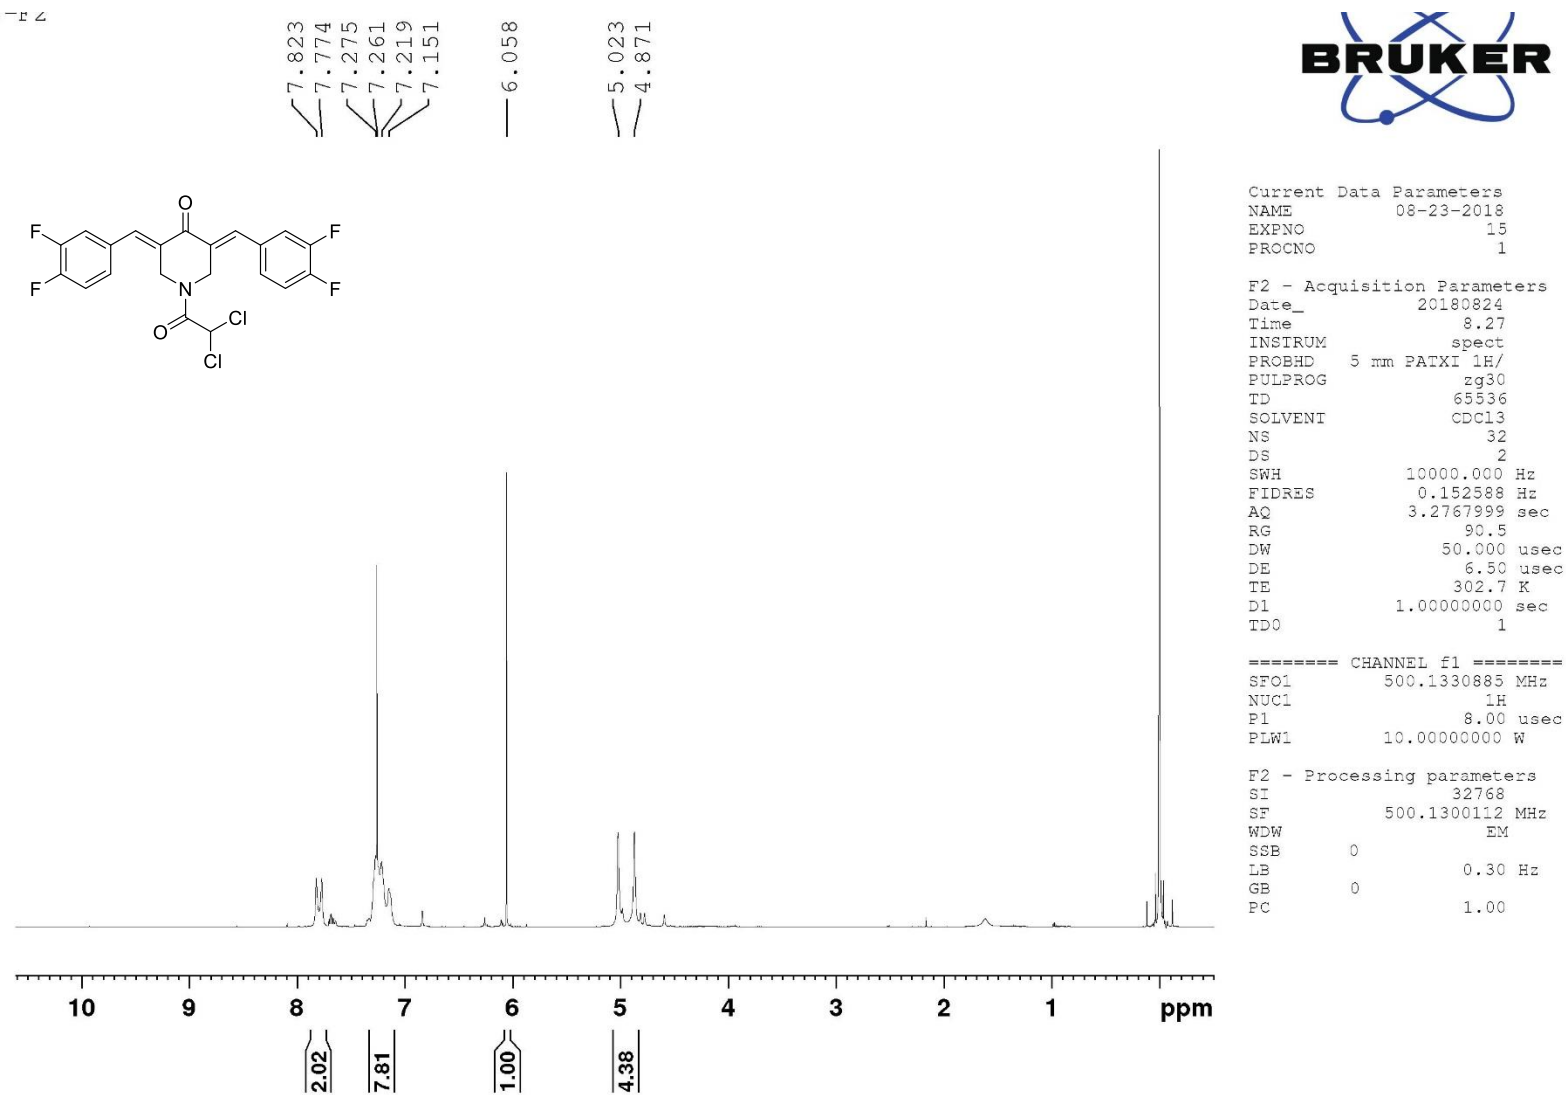

<sup>13</sup>C NMR (CDCl<sub>3</sub>) spectrum of 1-(2,2-dichloroacetyl)-3,5-bis((E)-3,4-difluorobenzylidene)piperidin-4-one (**1c**)

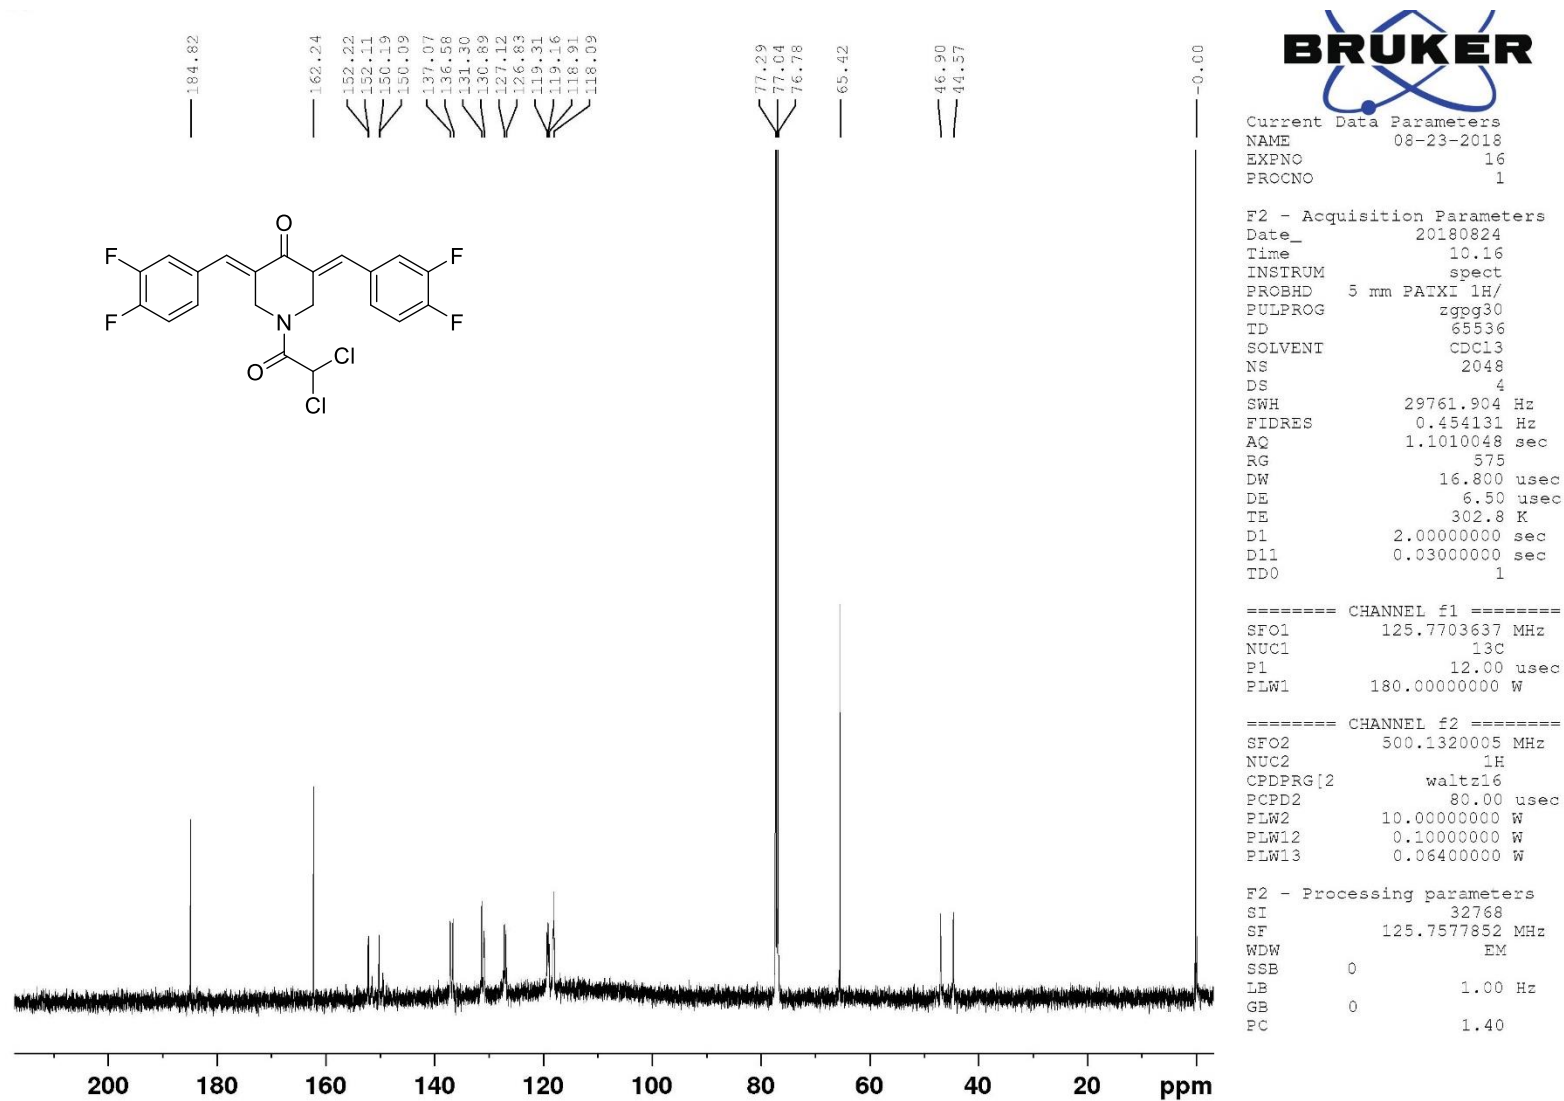

Mass spectrum of 1-(2,2-dichloroacetyl)-3,5-bis((*E*)-3,4-difluorobenzylidene)piperidin-4-one (**1c**)

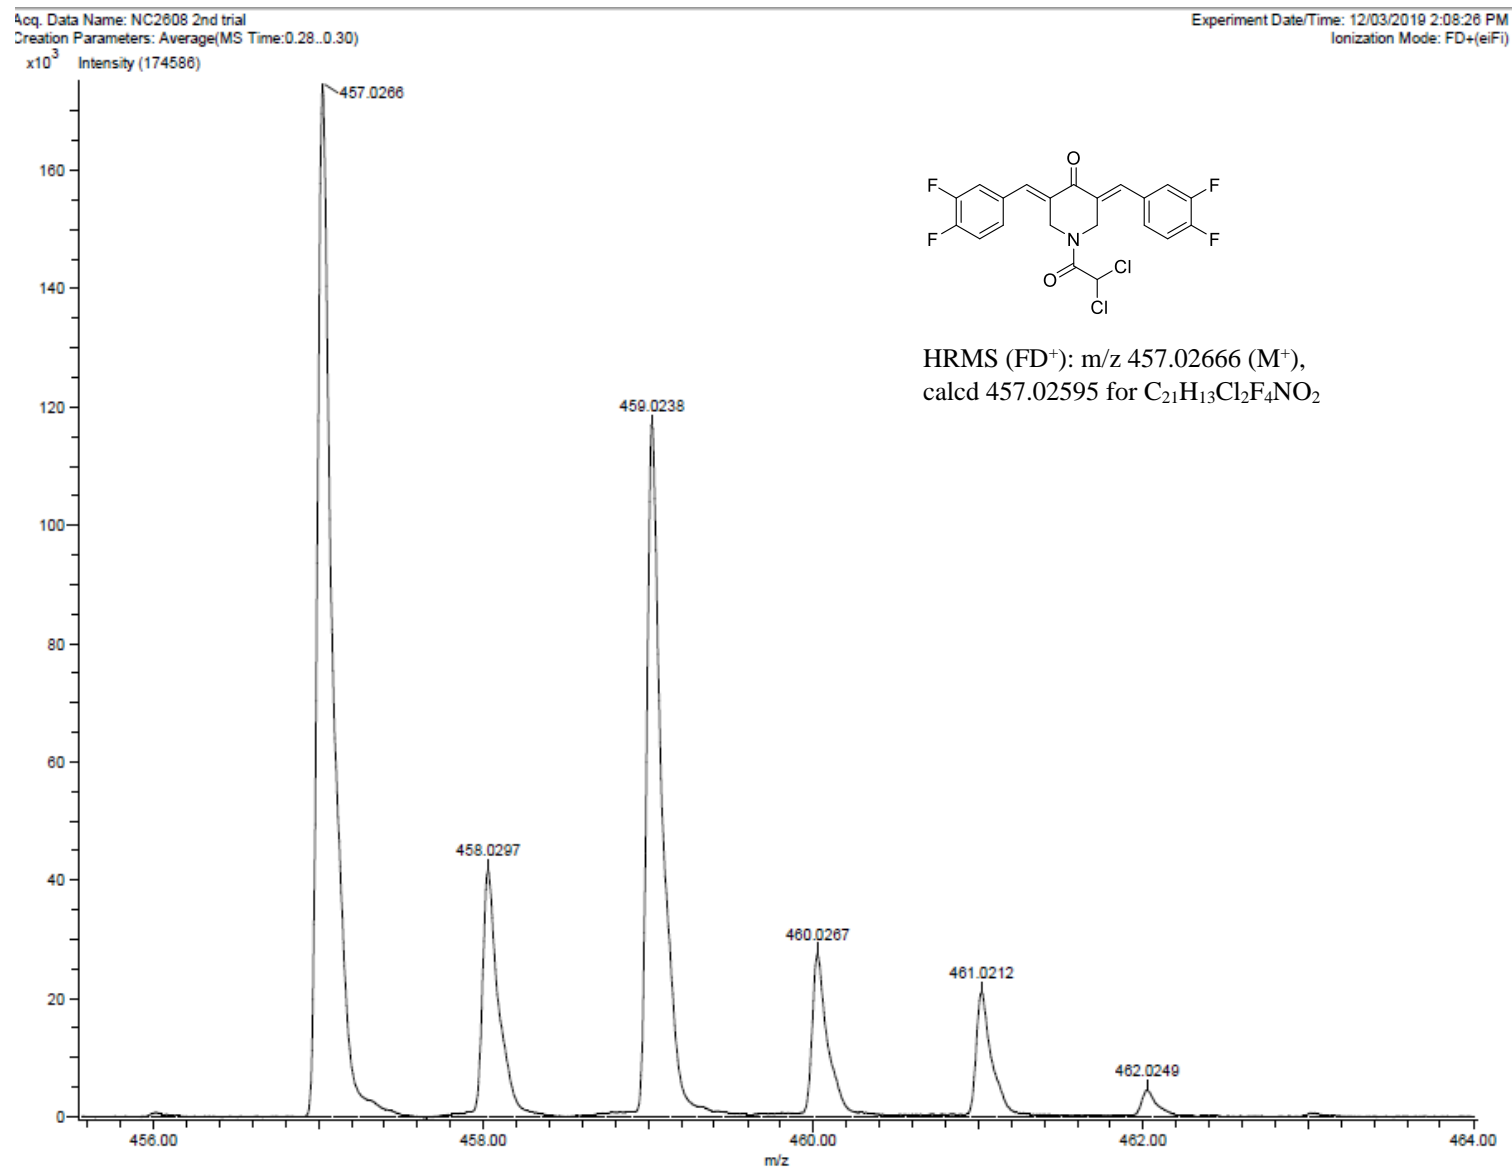

$^1\text{H}$  NMR ( $\text{CDCl}_3$ ) spectrum of 3,5-bis((*E*-4-chlorobenzylidene)-1-(2,2-dichloroacetyl)piperidin-4-one (**1d**)

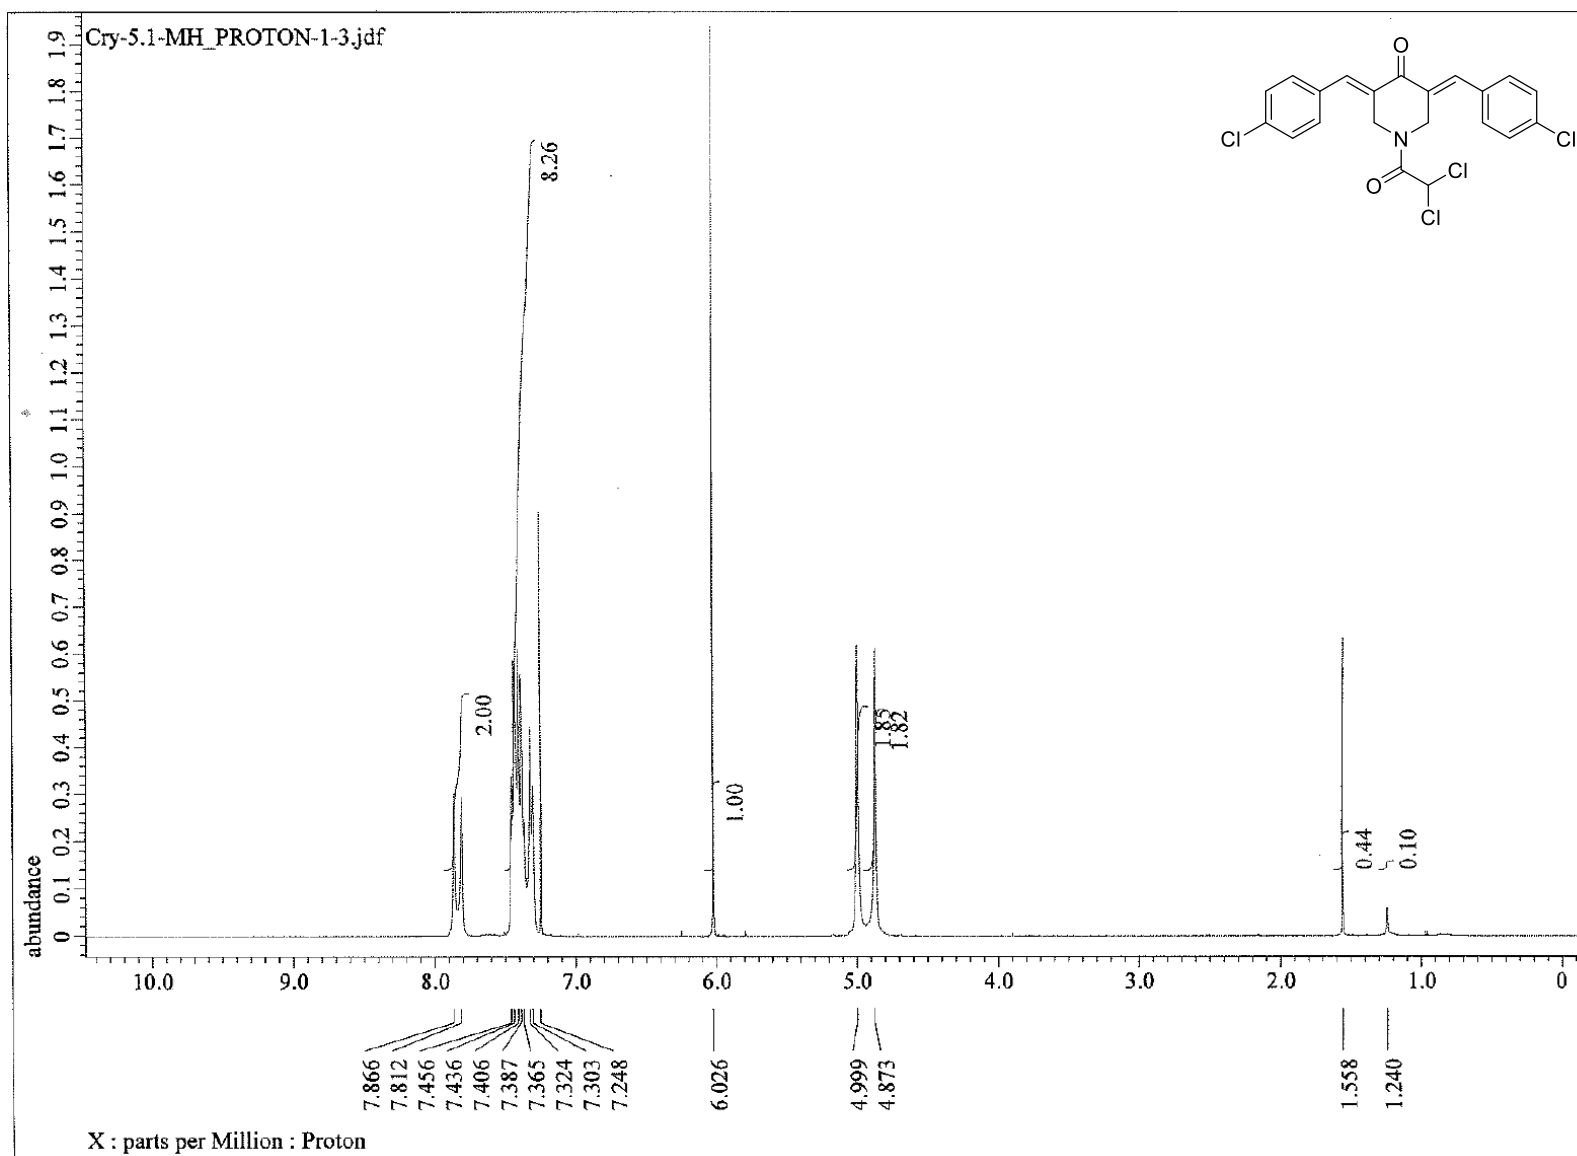

$^{13}\text{C}$  NMR ( $\text{CDCl}_3$ ) spectrum of 3,5-bis((*E*)-4-chlorobenzylidene)-1-(2,2-dichloroacetyl)piperidin-4-one (**1d**)

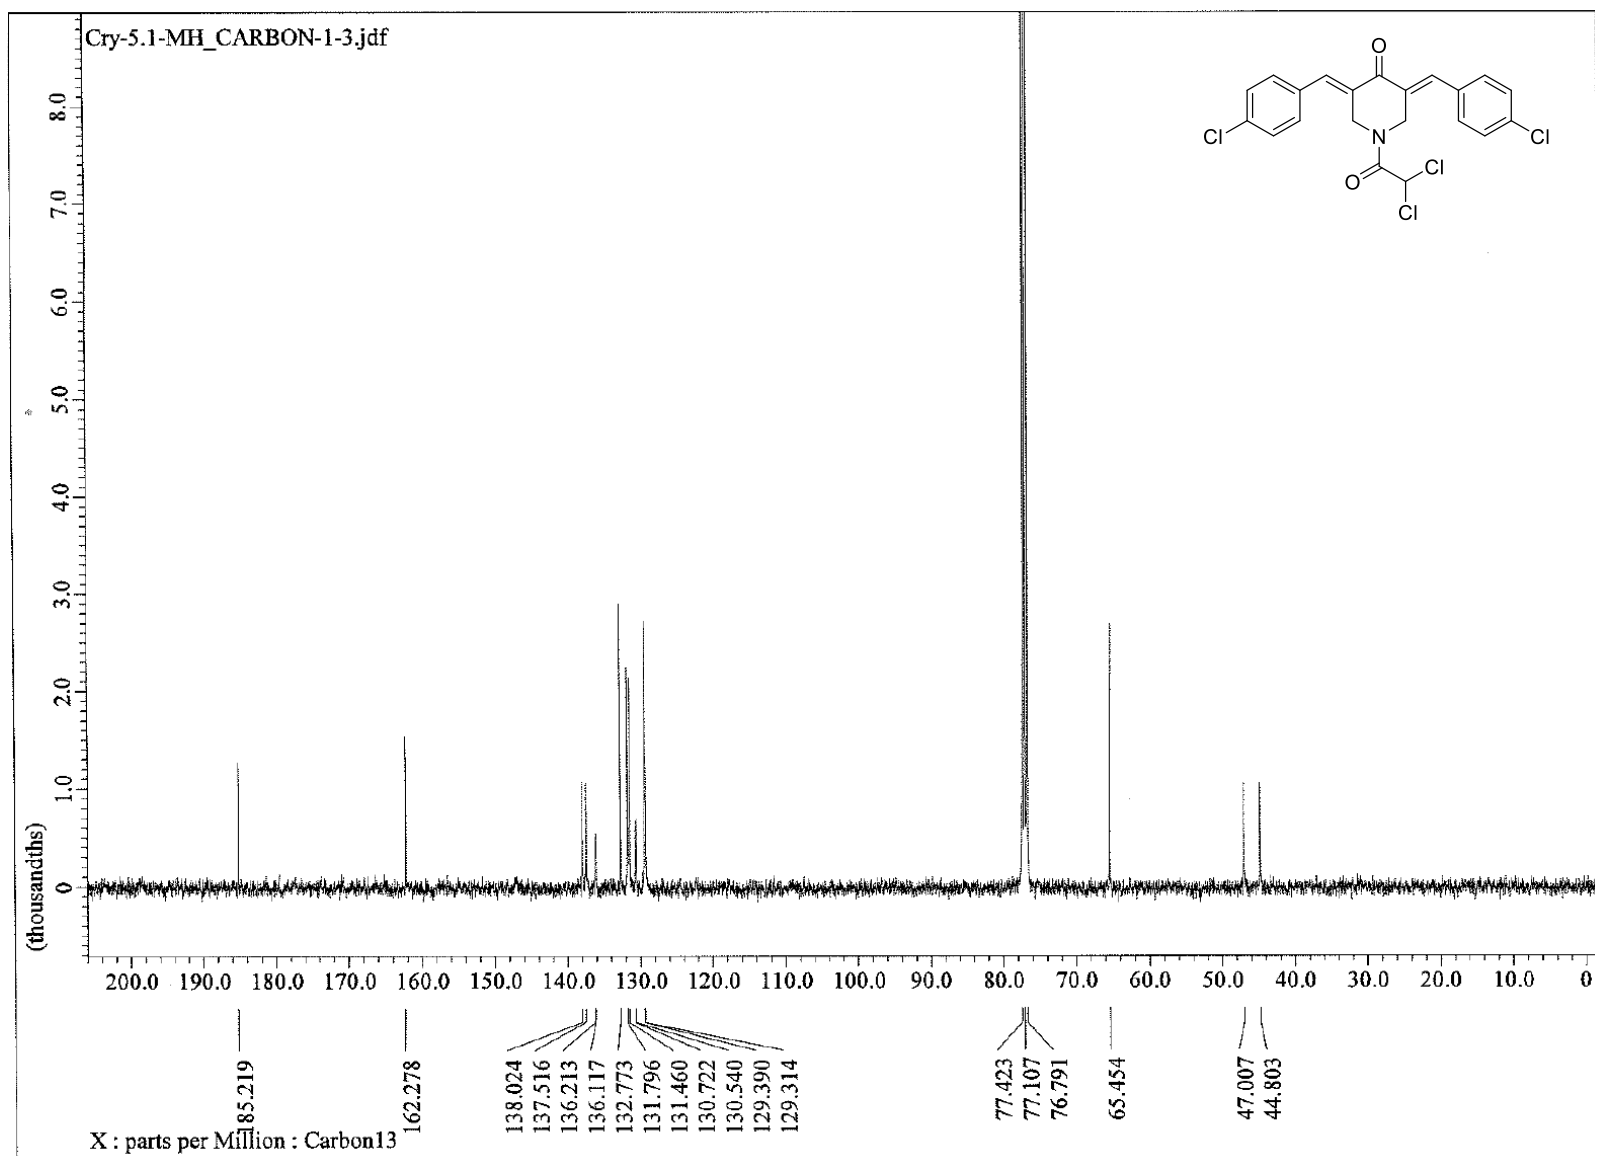

Mass spectrum of 3,5-bis((*E*)-4-chlorobenzylidene)-1-(2,2-dichloroacetyl)piperidin-4-one (**1d**)

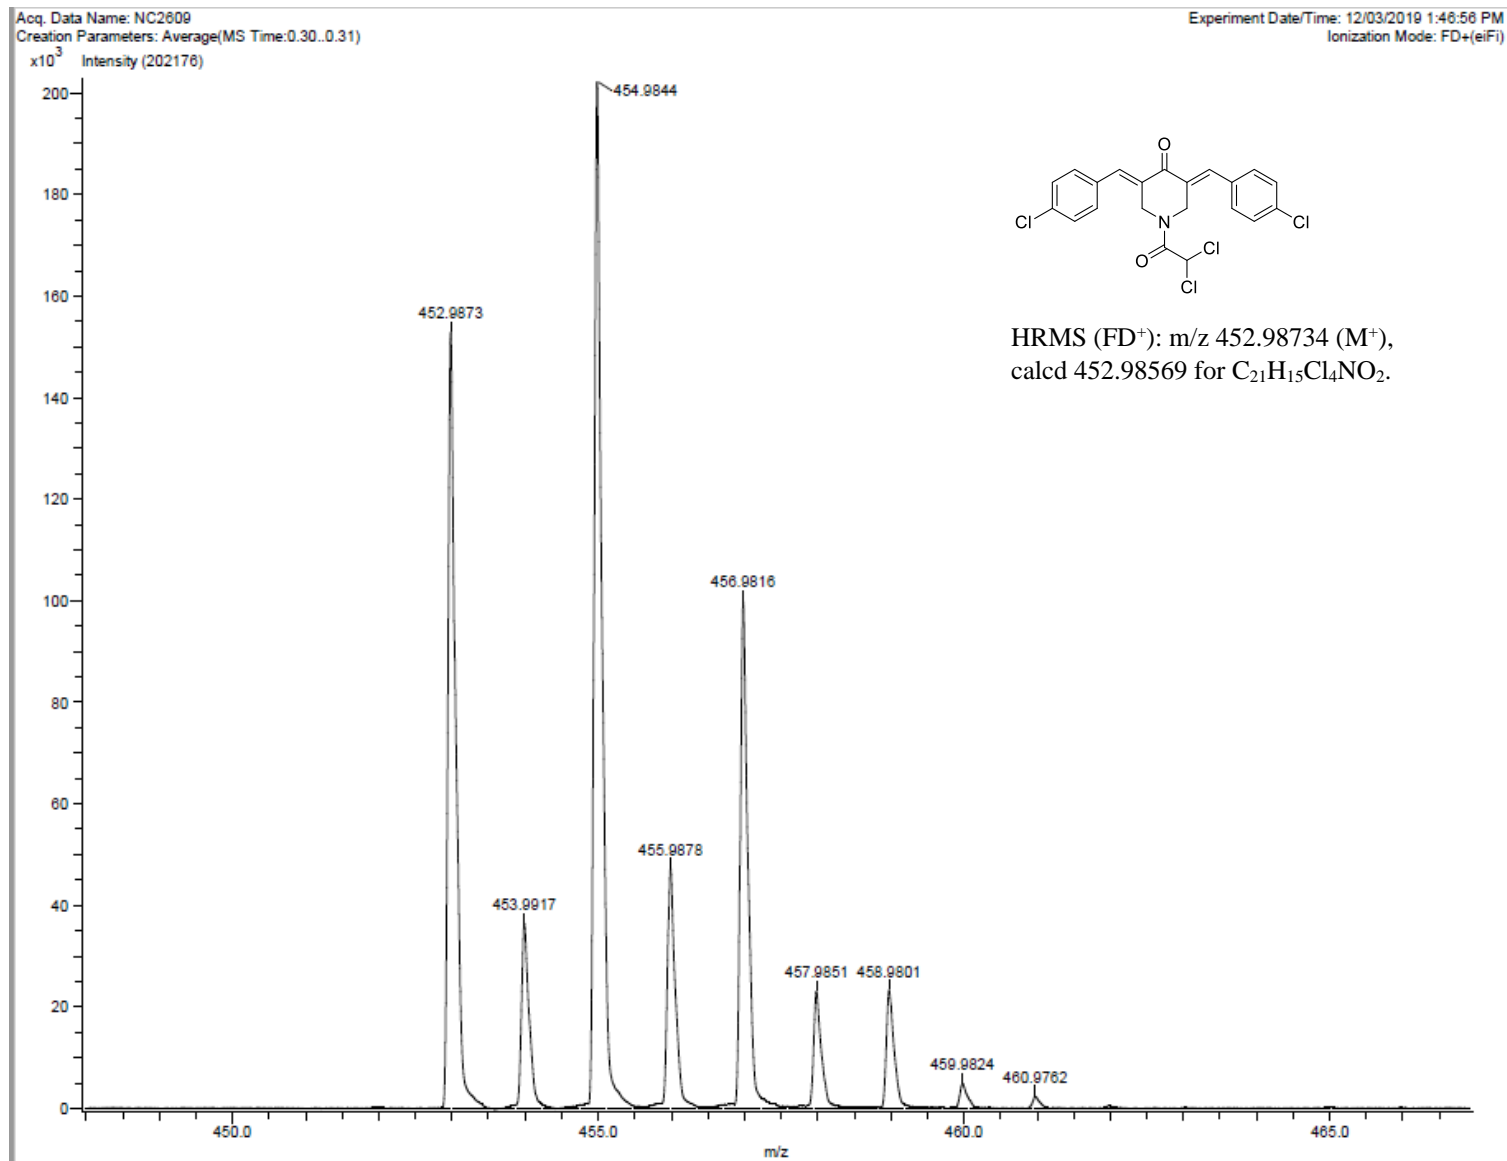

<sup>1</sup>H NMR (CDCl<sub>3</sub>) spectrum of 1-(2,2-dichloroacetyl)-3,5-bis((*E*)-3,4-dichlorobenzylidene)piperidin-4-one (**1e**)

12

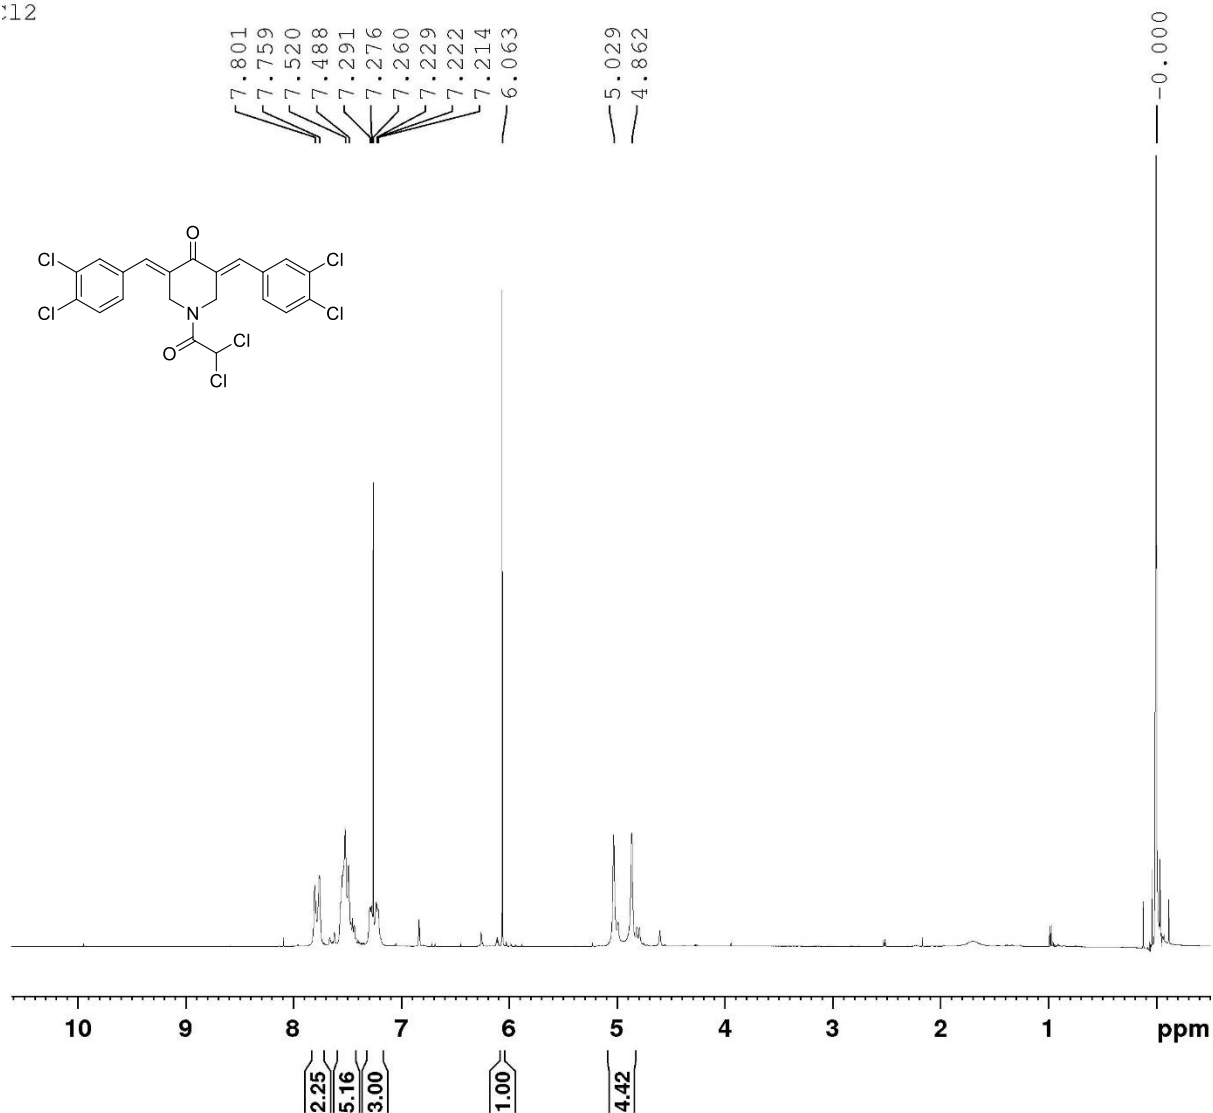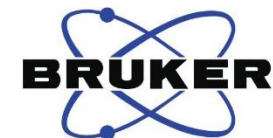

Current Data Parameters  
NAME 08-23-2018  
EXPNO 13  
PROCNO 1

F2 - Acquisition Parameters  
Date\_ 20180824  
Time 6.30  
INSTRUM spect  
PROBHD 5 mm PATXI 1H/  
PULPROG zg30  
TD 65536  
SOLVENT CDCl3  
NS 32  
DS 2  
SWH 10000.000 Hz  
FIDRES 0.152588 Hz  
AQ 3.2767999 sec  
RG 80.6  
DW 50.000 usec  
DE 6.50 usec  
TE 302.5 K  
D1 1.00000000 sec  
TD0 1

===== CHANNEL f1 =====  
SFO1 500.1330885 MHz  
NUC1 1H  
P1 8.00 usec  
PLW1 10.00000000 W

F2 - Processing parameters  
SI 32768  
SF 500.1300120 MHz  
WDW EM  
SSB 0  
LB 0.30 Hz  
GB 0  
PC 1.00



<sup>13</sup>C NMR (CDCl<sub>3</sub>) spectrum of 1-(2,2-dichloroacetyl)-3,5-bis((E)-3,4-dichlorobenzylidene)piperidin-4-one (**1e**)

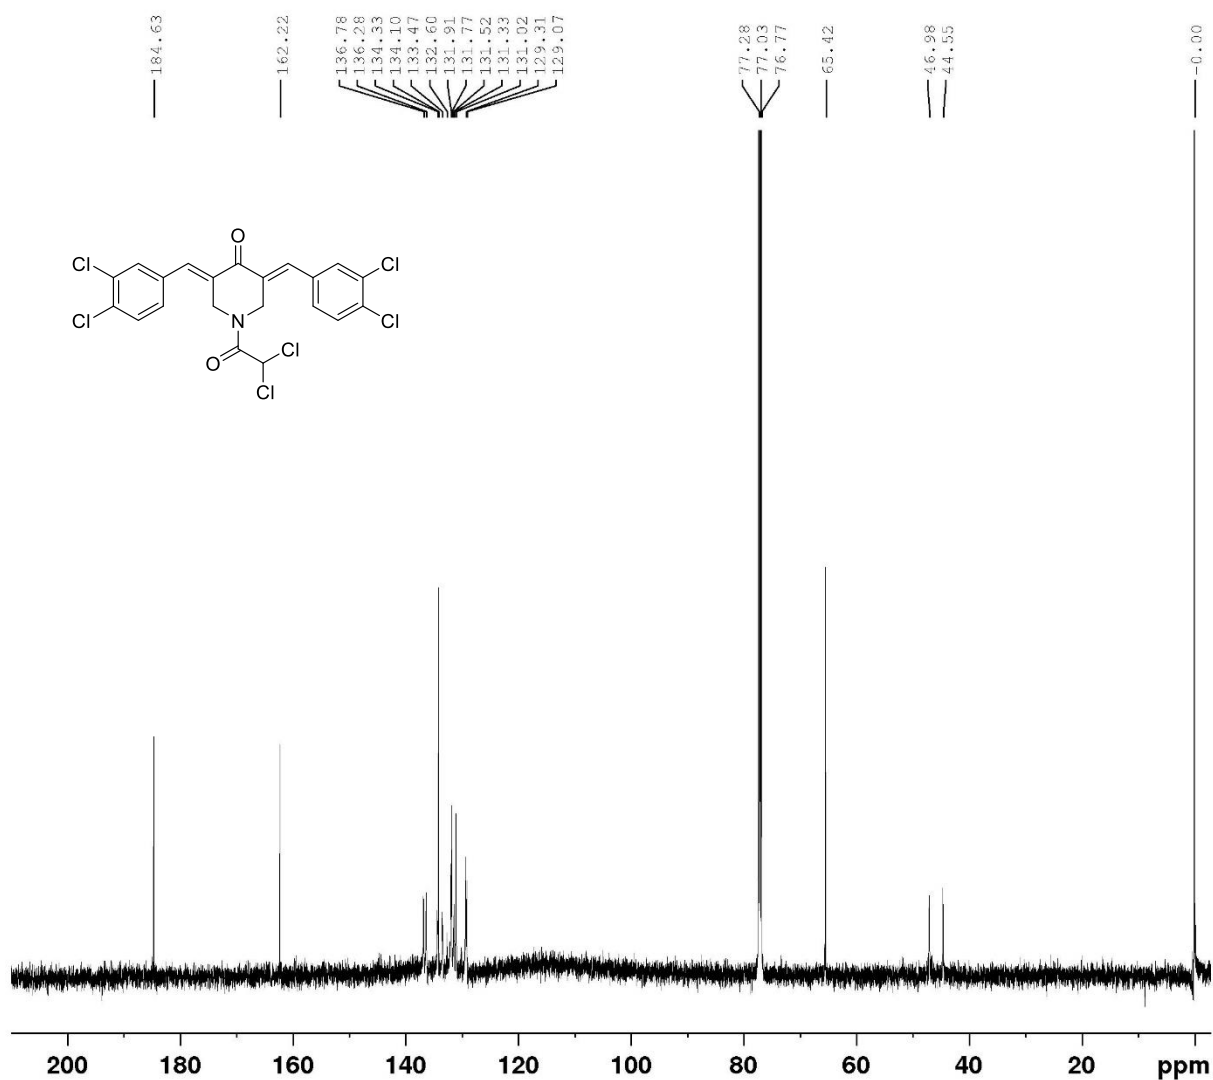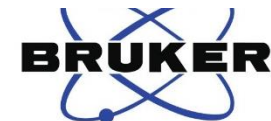

```

Current Data Parameters
NAME      08-23-2018
EXPNO     14
PROCNO    1

F2 - Acquisition Parameters
Date_     20180824
Time      8.20
INSTRUM   spect
PROBHD    5 mm PATXI 1H/
PULPROG   zgpg30
TD        65536
SOLVENT   CDCl3
NS        2048
DS        4
SWH       29761.904 Hz
FIDRES    0.454131 Hz
AQ        1.1010048 sec
RG        575
DW        16.800 usec
DE        6.50 usec
TE        303.0 K
D1        2.00000000 sec
D11       0.03000000 sec
TD0       1

===== CHANNEL f1 =====
SFO1      125.7703637 MHz
NUC1      13C
P1        12.00 usec
PLW1      180.00000000 W

===== CHANNEL f2 =====
SFO2      500.1320005 MHz
NUC2      1H
CPDPRG[2  waltz16
PCPD2     80.00 usec
PLW2      10.00000000 W
PLW12     0.10000000 W
PLW13     0.06400000 W

F2 - Processing parameters
SI        32768
SF        125.7577869 MHz
WDW       EM
SSB       0
LB        1.00 Hz
GB        0
PC        1.40
    
```

Mass spectrum of 1-(2,2-dichloroacetyl)-3,5-bis((*E*)-3,4-dichlorobenzylidene)piperidin-4-one (**1e**)

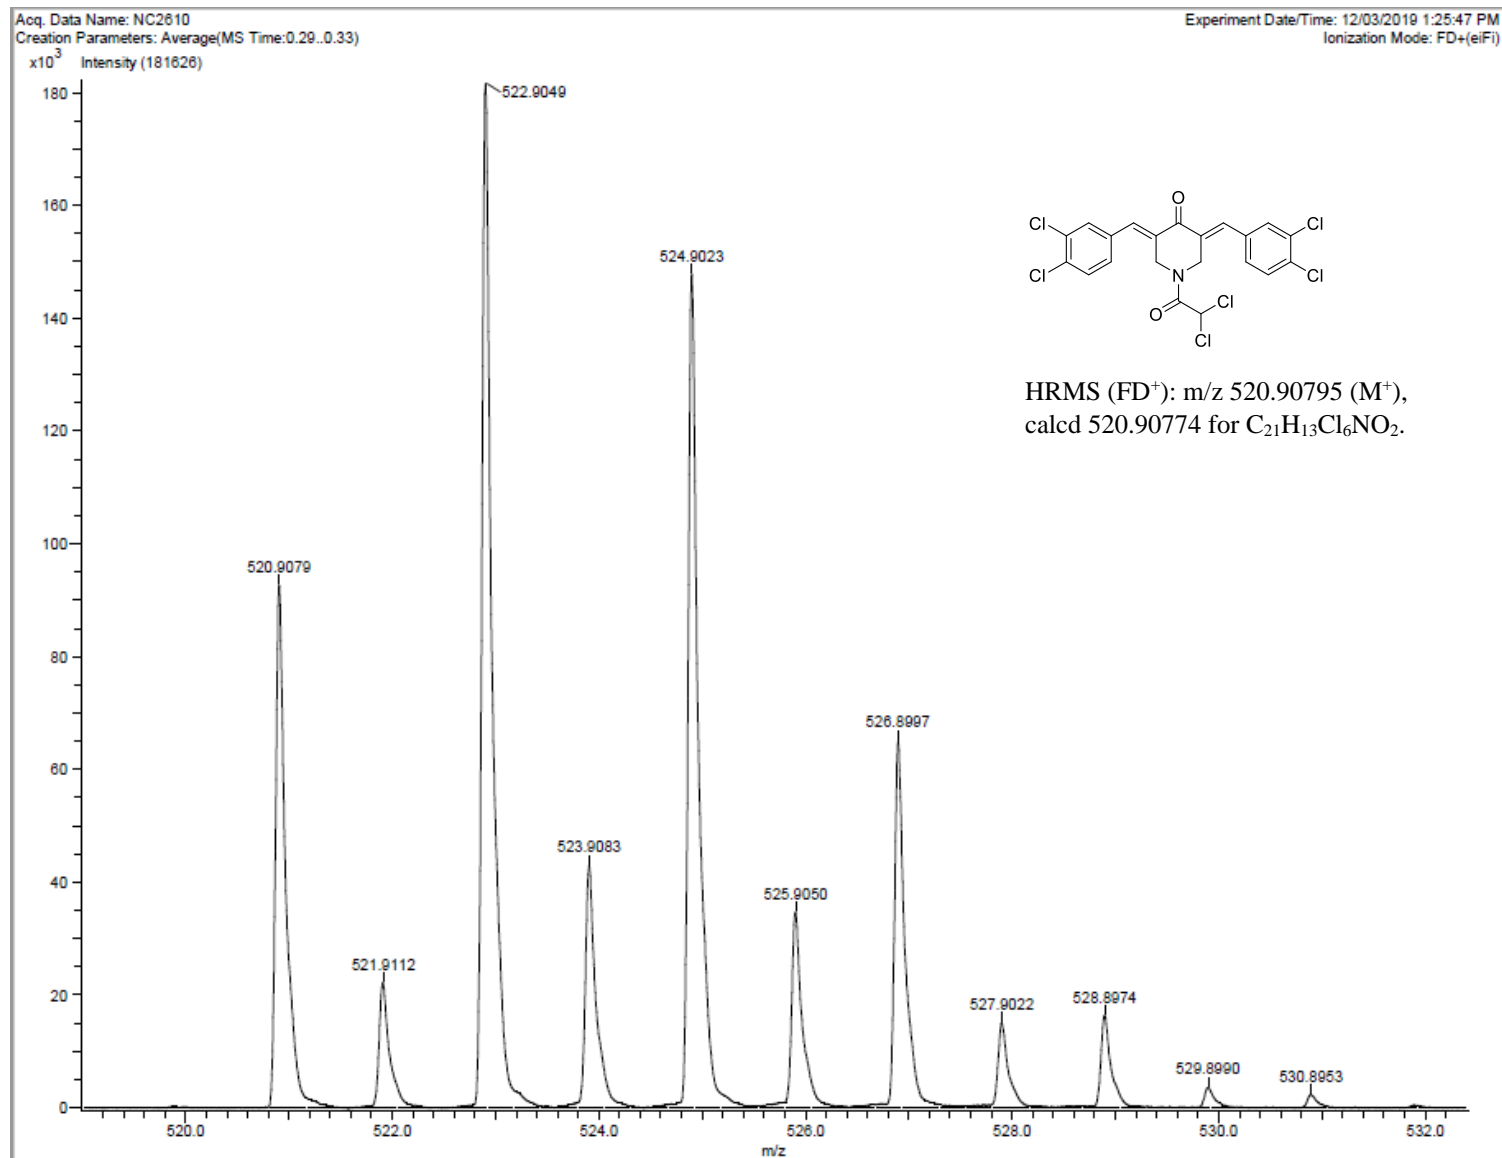

$^1\text{H}$  NMR ( $\text{CDCl}_3$ ) spectrum of 1-(2,2-dichloroacetyl)-3,5-bis((*E*)-4-methoxybenzylidene)piperidin-4-one (**1f**)

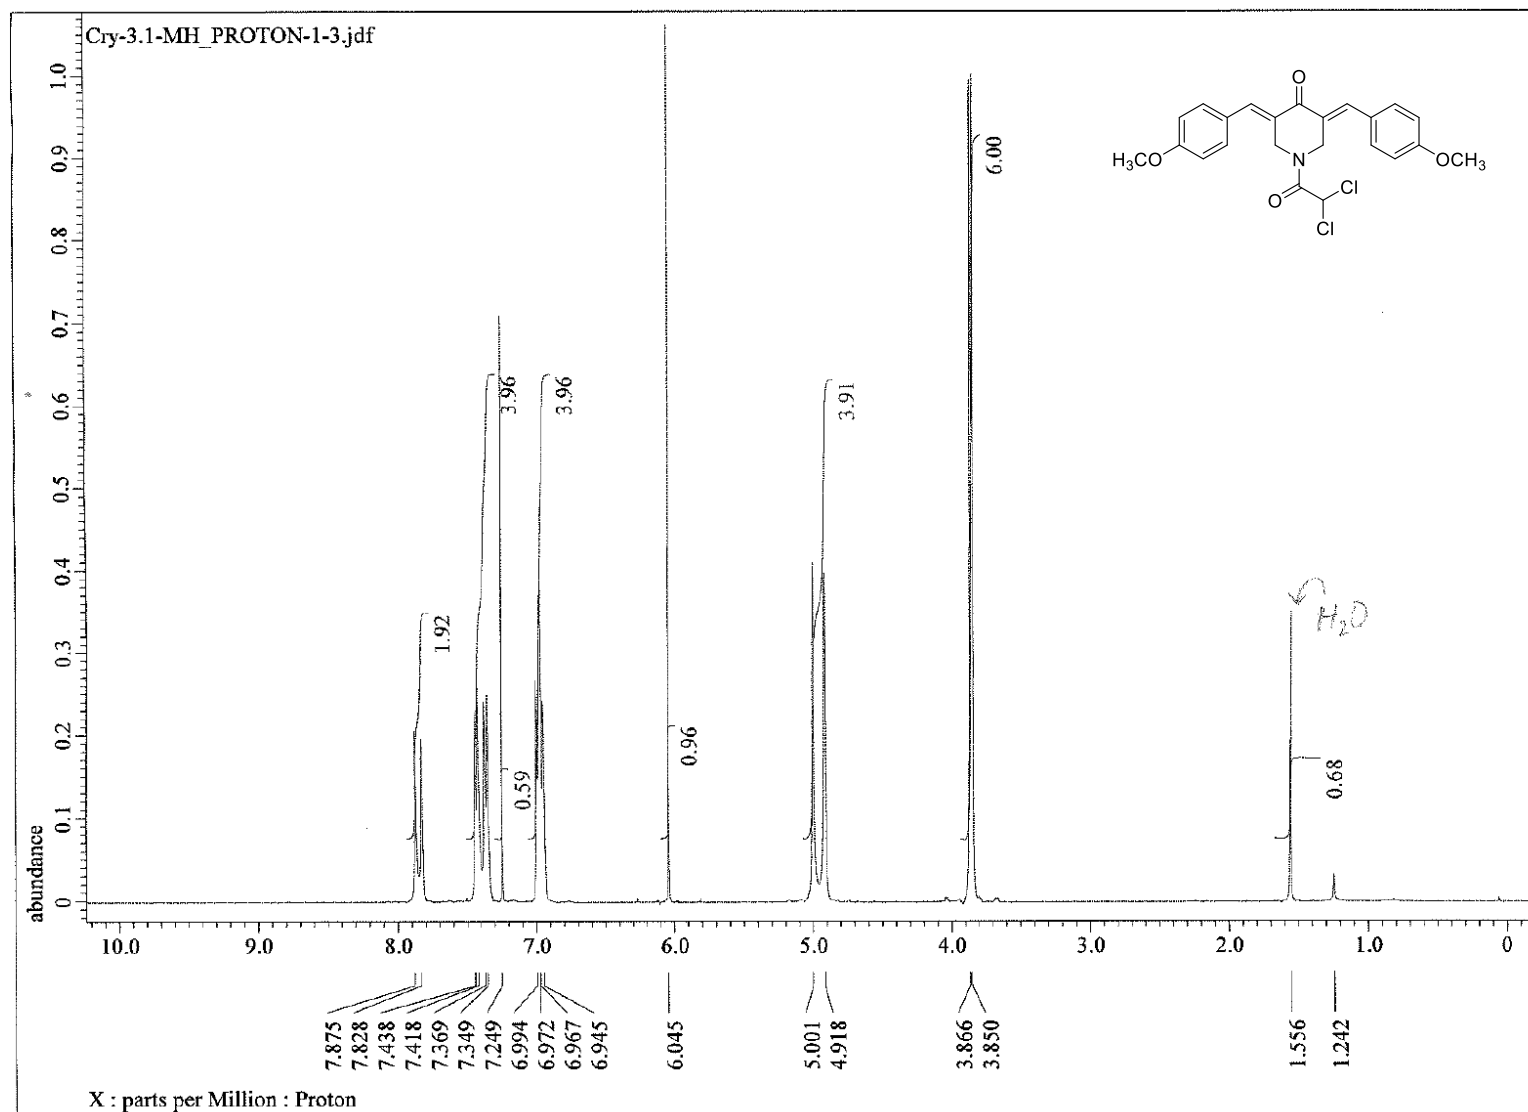

$^{13}\text{C}$  NMR ( $\text{CDCl}_3$ ) spectrum of 1-(2,2-dichloroacetyl)-3,5-bis((*E*)-4-methoxybenzylidene)piperidin-4-one (**1f**)

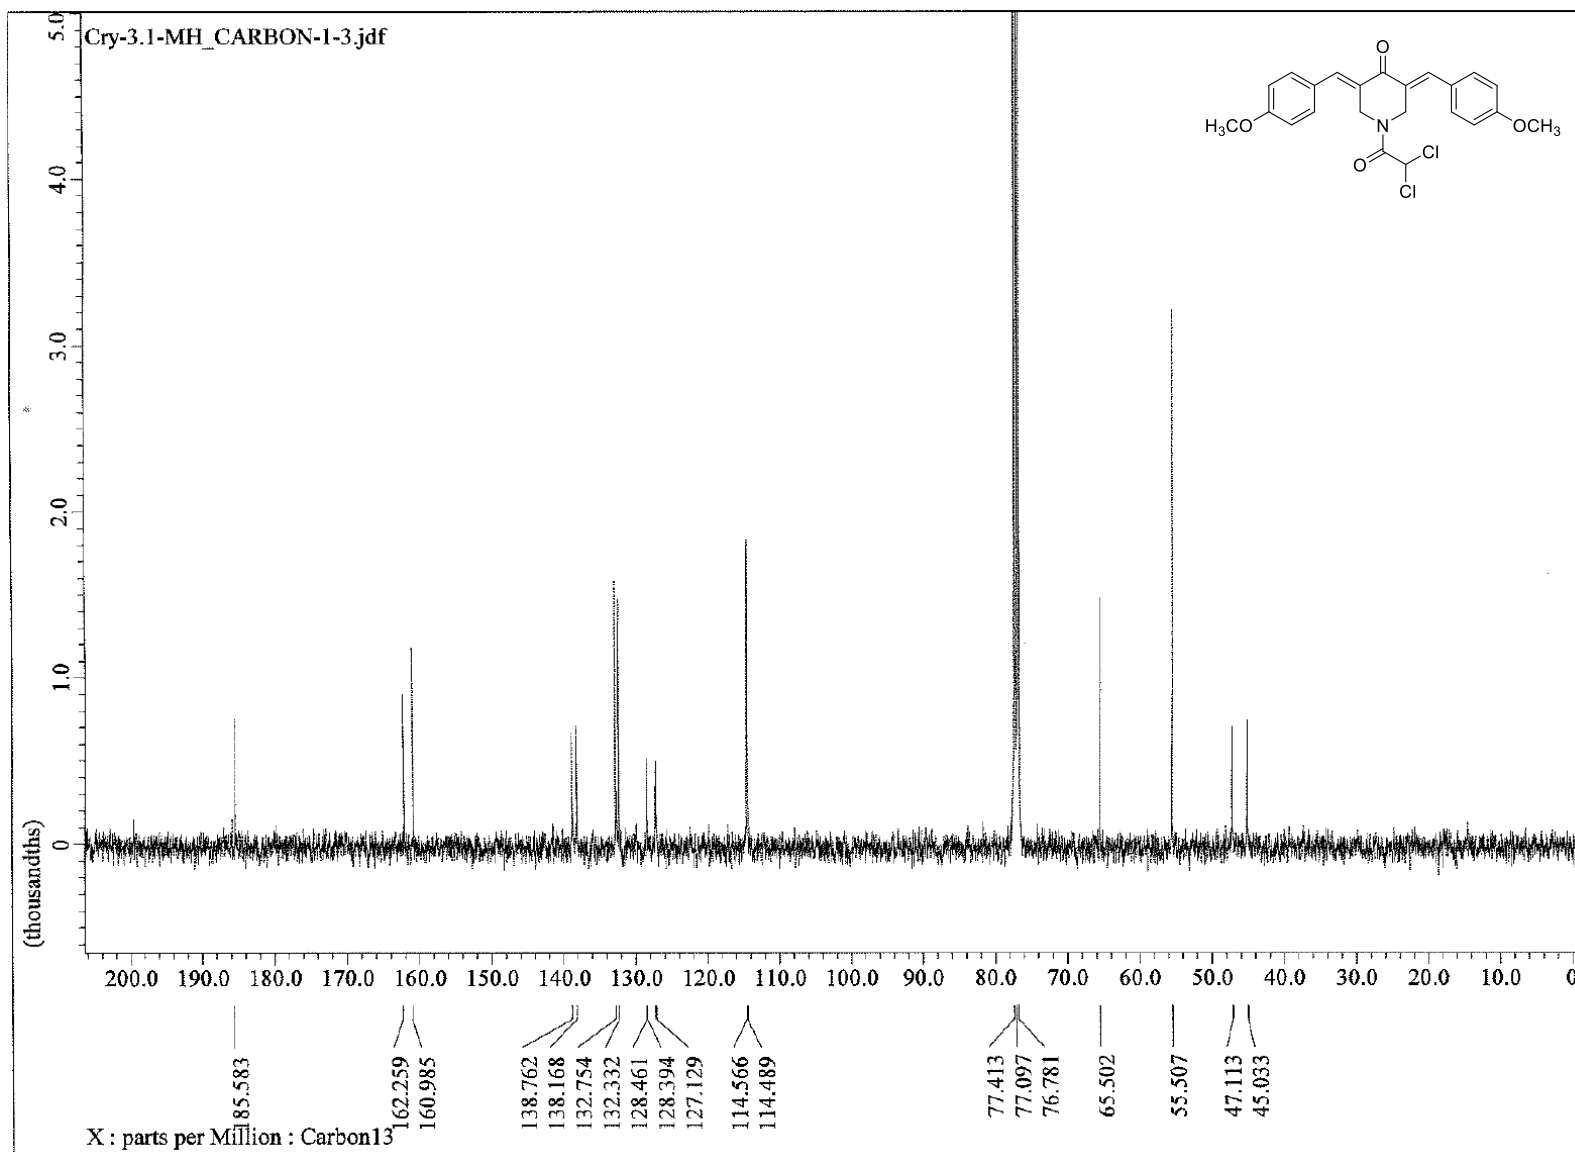

Mass spectrum of 1-(2,2-dichloroacetyl)-3,5-bis((*E*)-4-methoxybenzylidene)piperidin-4-one (**1f**)

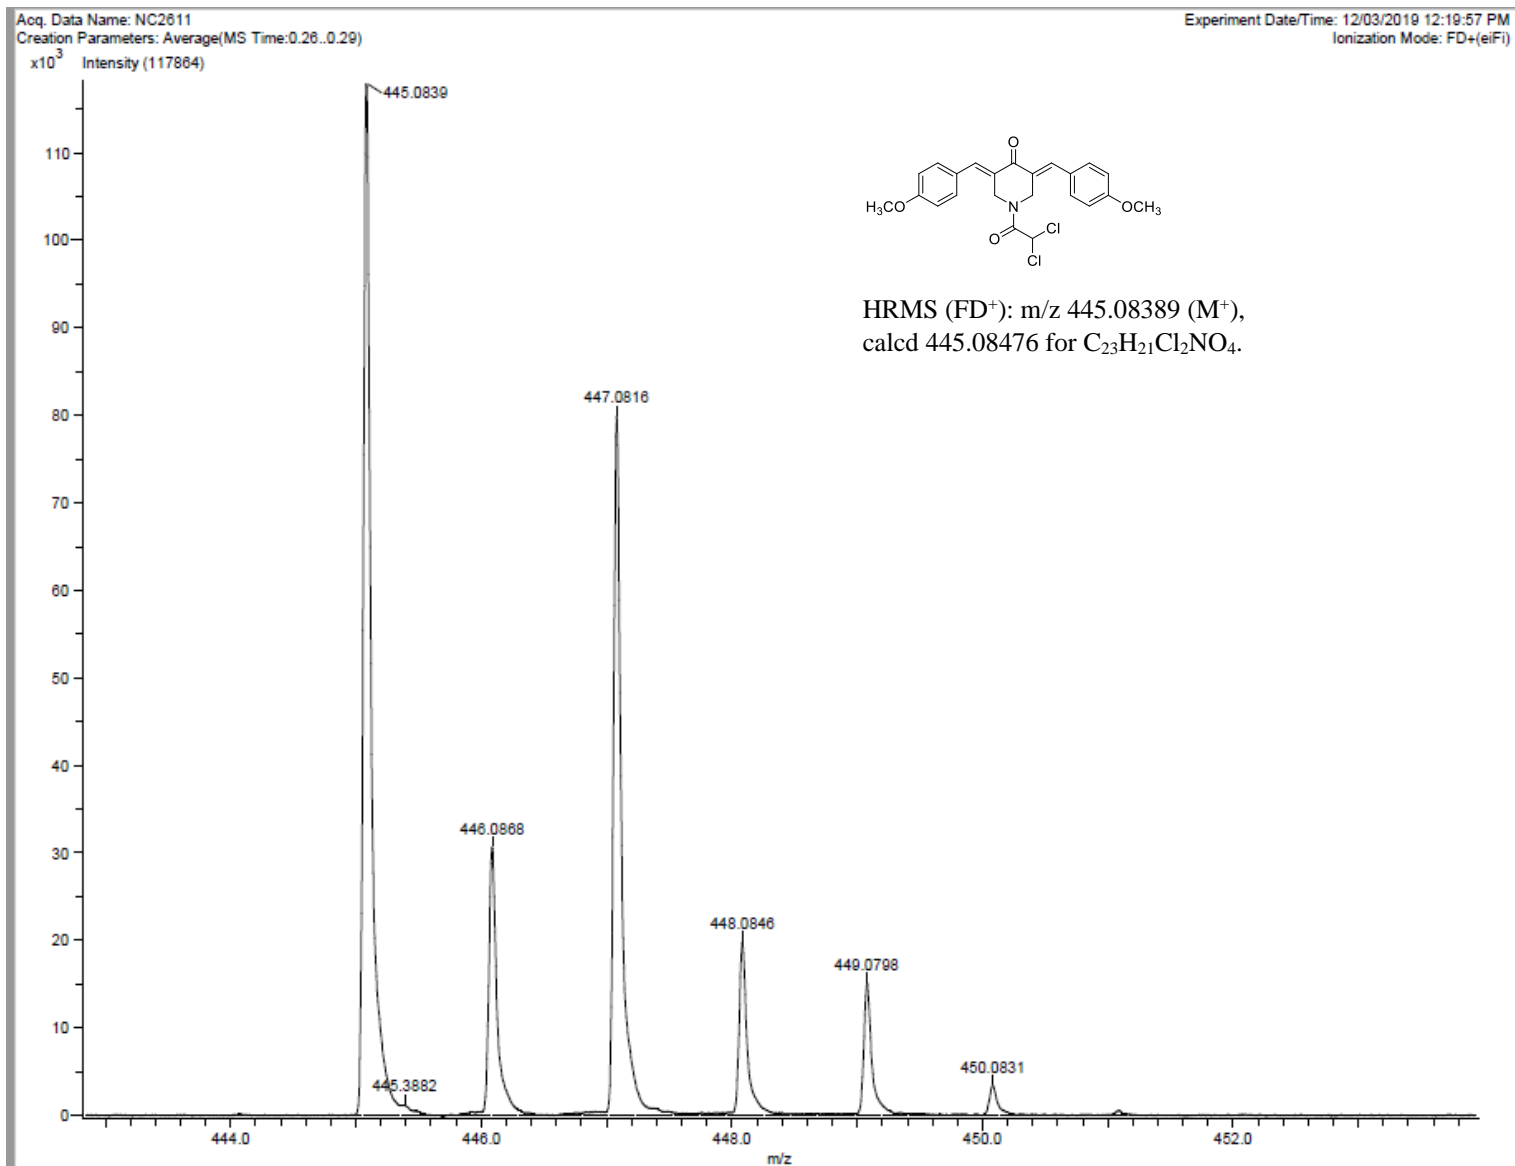

<sup>1</sup>H NMR ((CD<sub>3</sub>)<sub>2</sub>SO) spectrum of 1-(2,2-dichloroacetyl)-3,5-bis((*E*)-3,4-dimethoxybenzylidene)piperidin-4-one (**1g**)

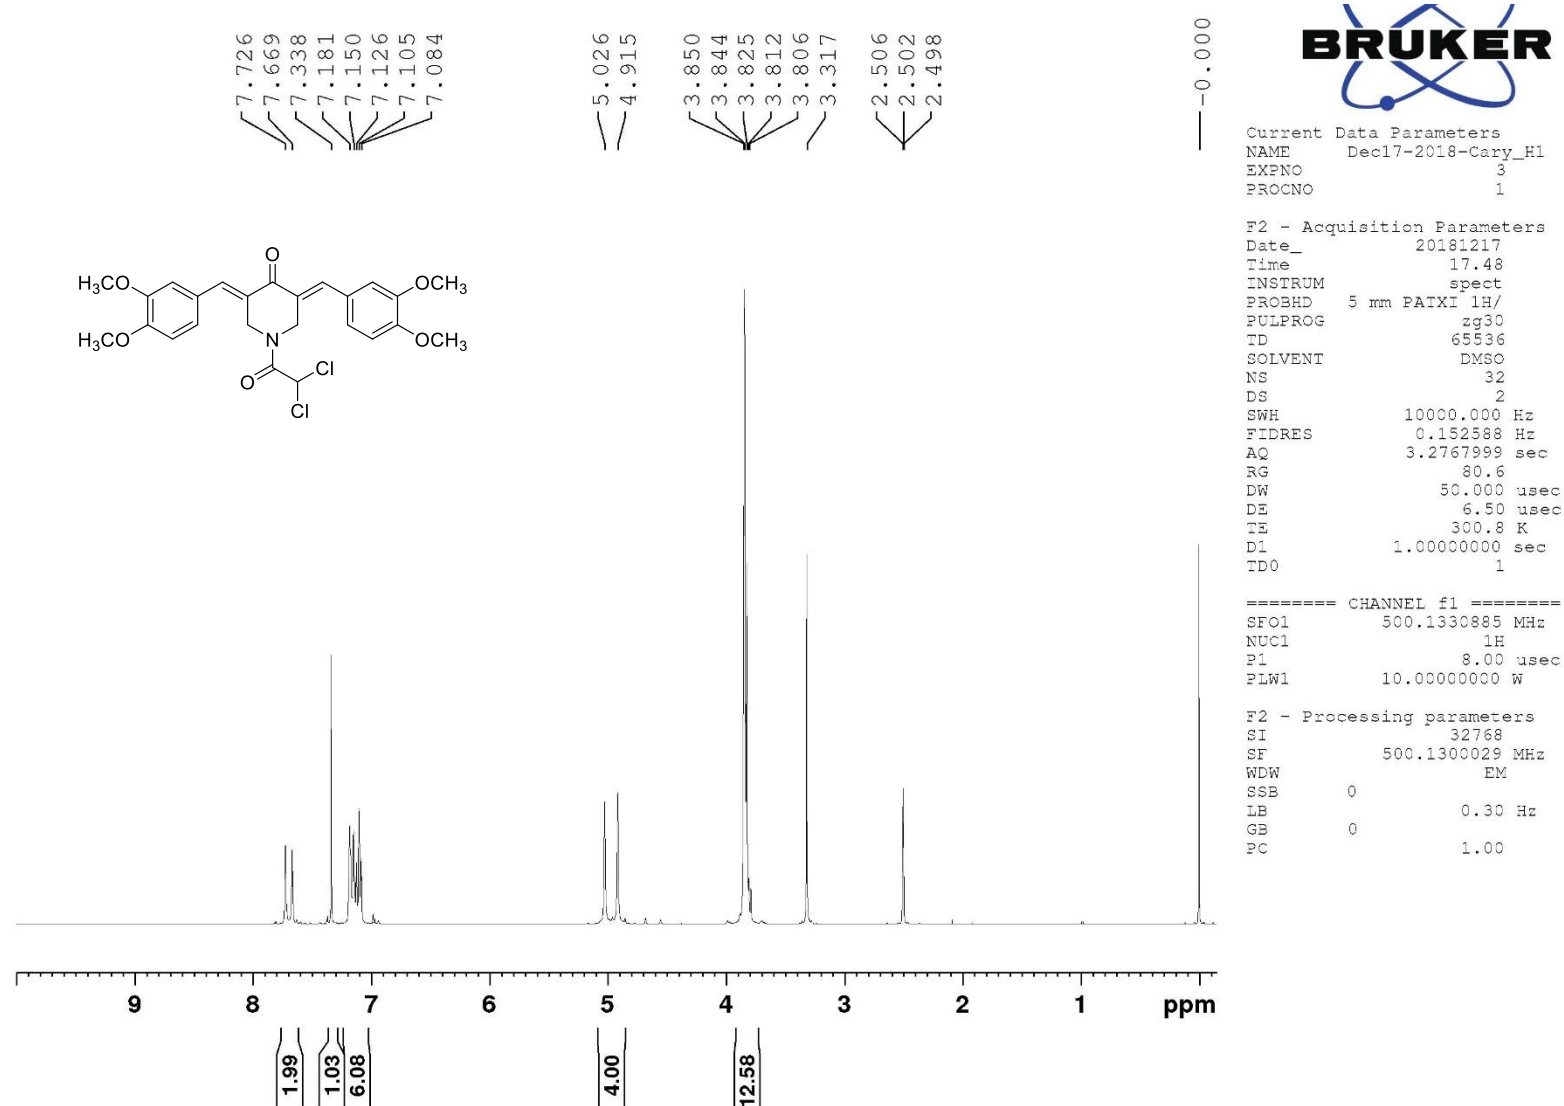

<sup>13</sup>C NMR ((CD<sub>3</sub>)<sub>2</sub>SO) spectrum of 1-(2,2-dichloroacetyl)-3,5-bis((*E*)-3,4-dimethoxybenzylidene)piperidin-4-one (**1g**)

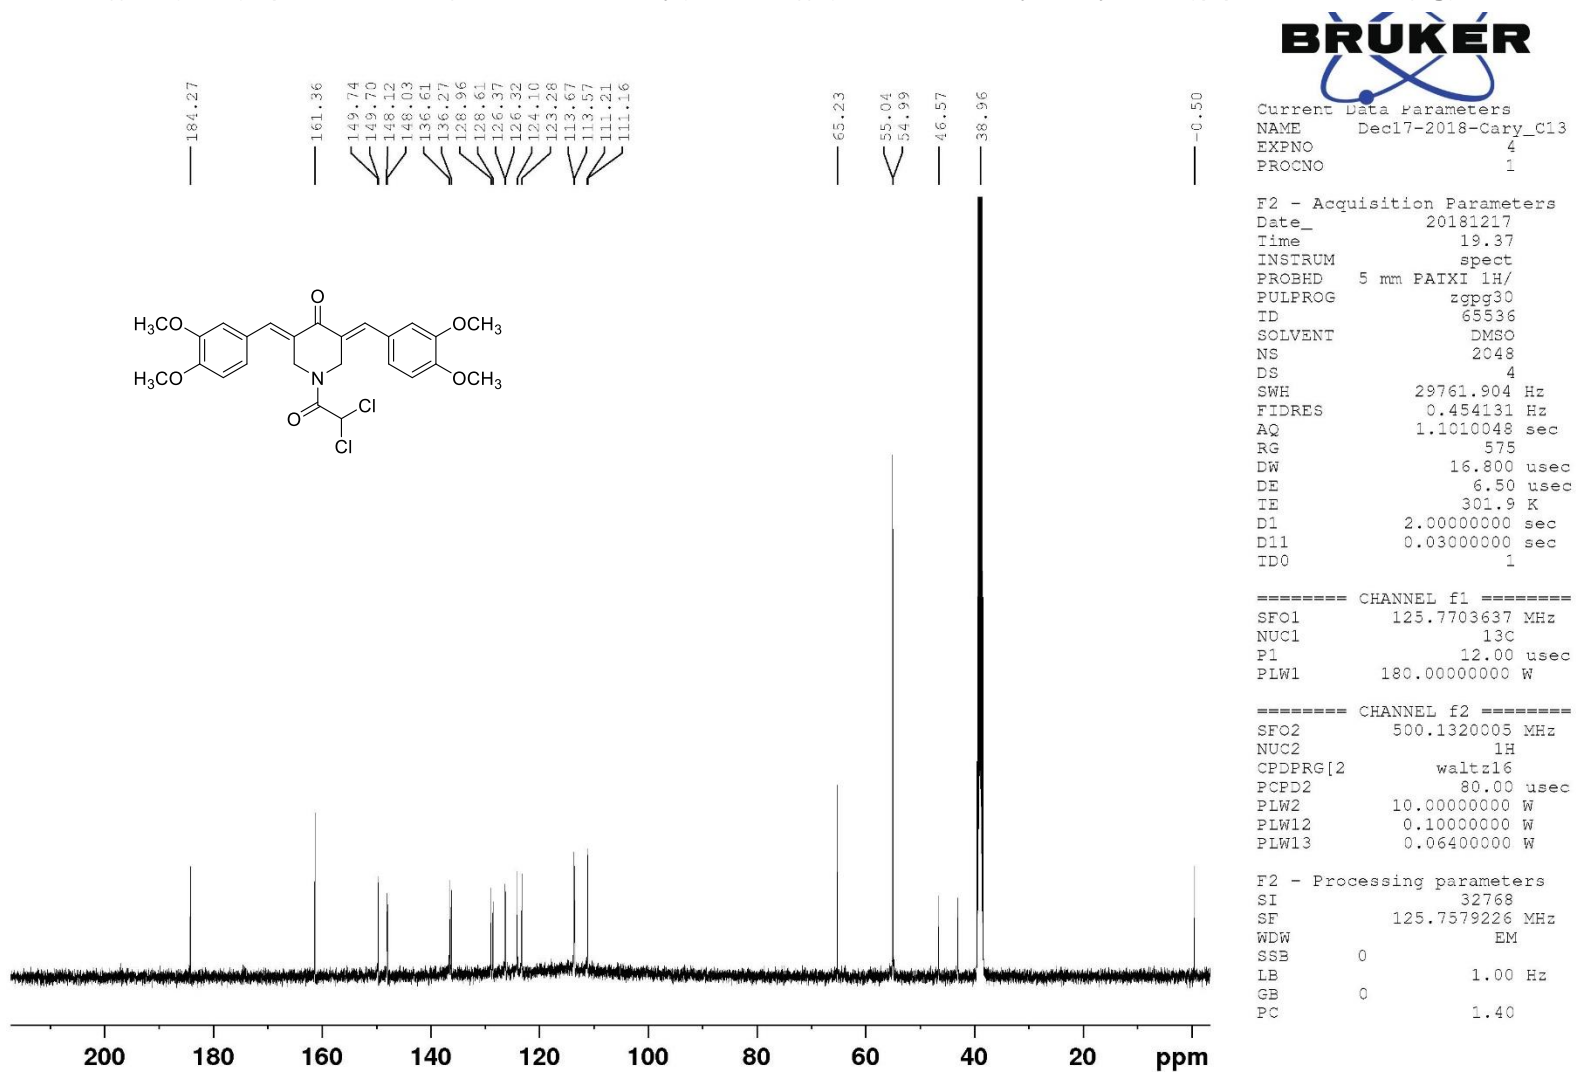

Mass spectrum of 1-(2,2-dichloroacetyl)-3,5-bis((*E*)-3,4-dimethoxybenzylidene)piperidin-4-one (**1g**)

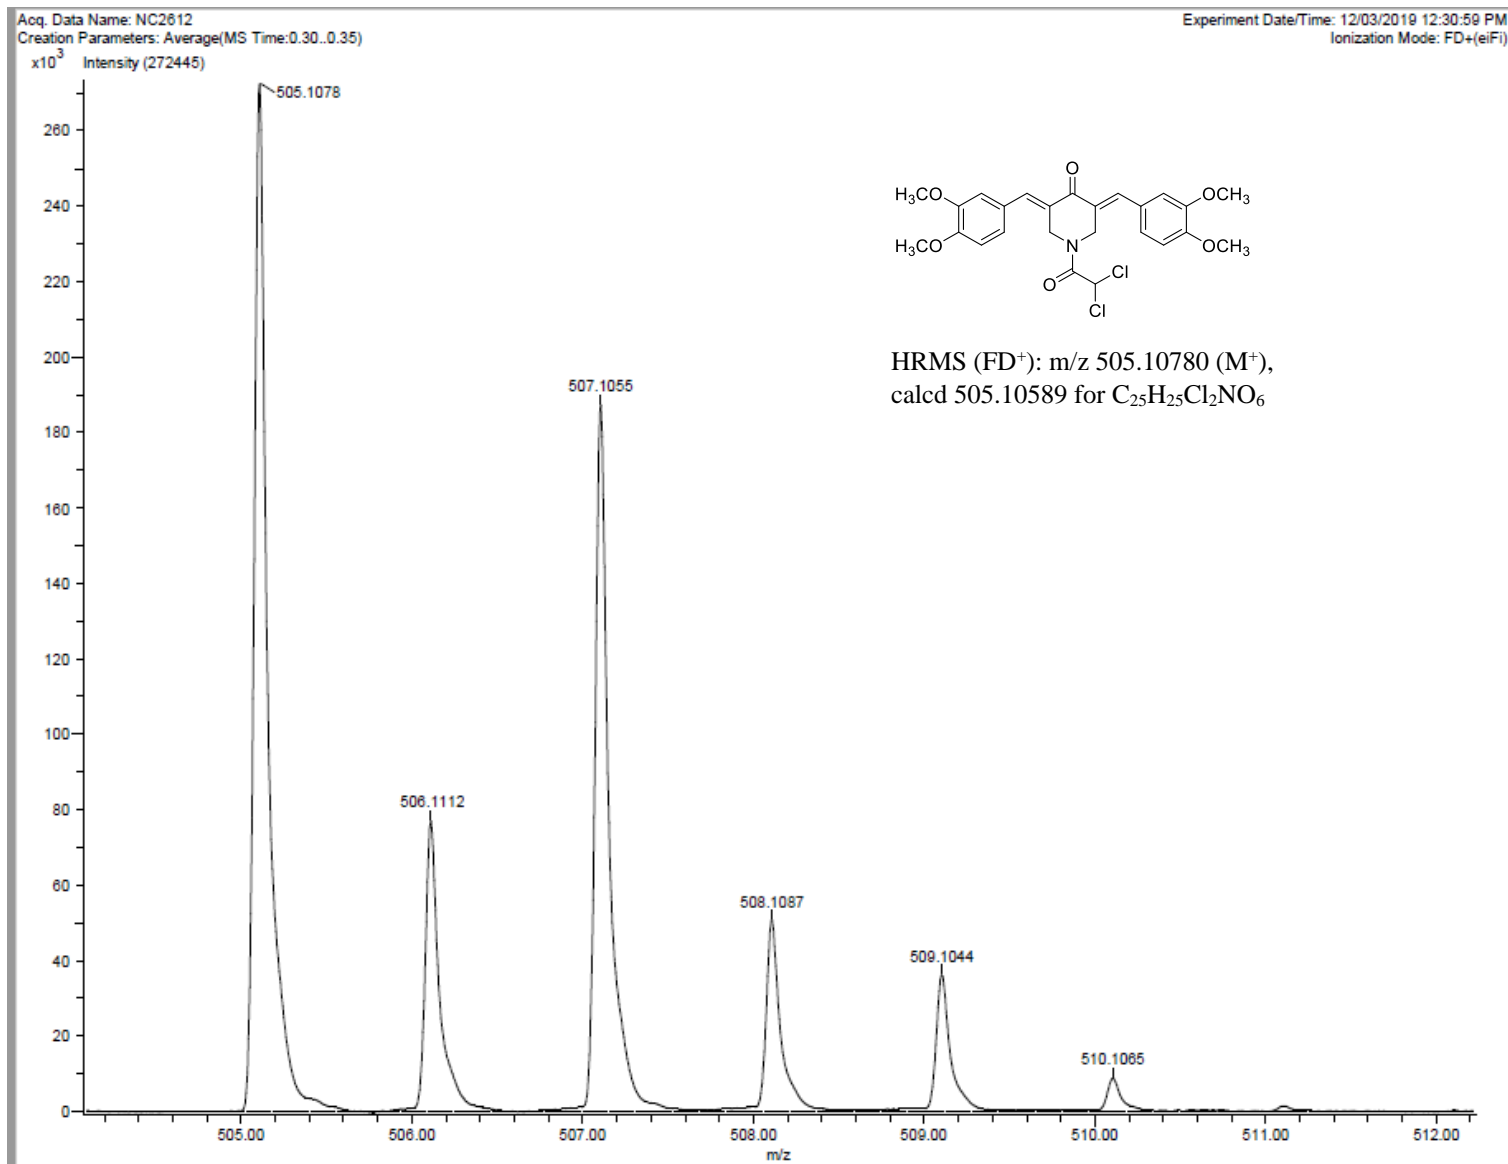



<sup>1</sup>H NMR ((CD<sub>3</sub>)<sub>2</sub>SO) spectrum of 1-(2,2-dichloroacetyl)-3,5-bis((*E*)-3,4,5-trimethoxybenzylidene)piperidin-4-one (**1h**)

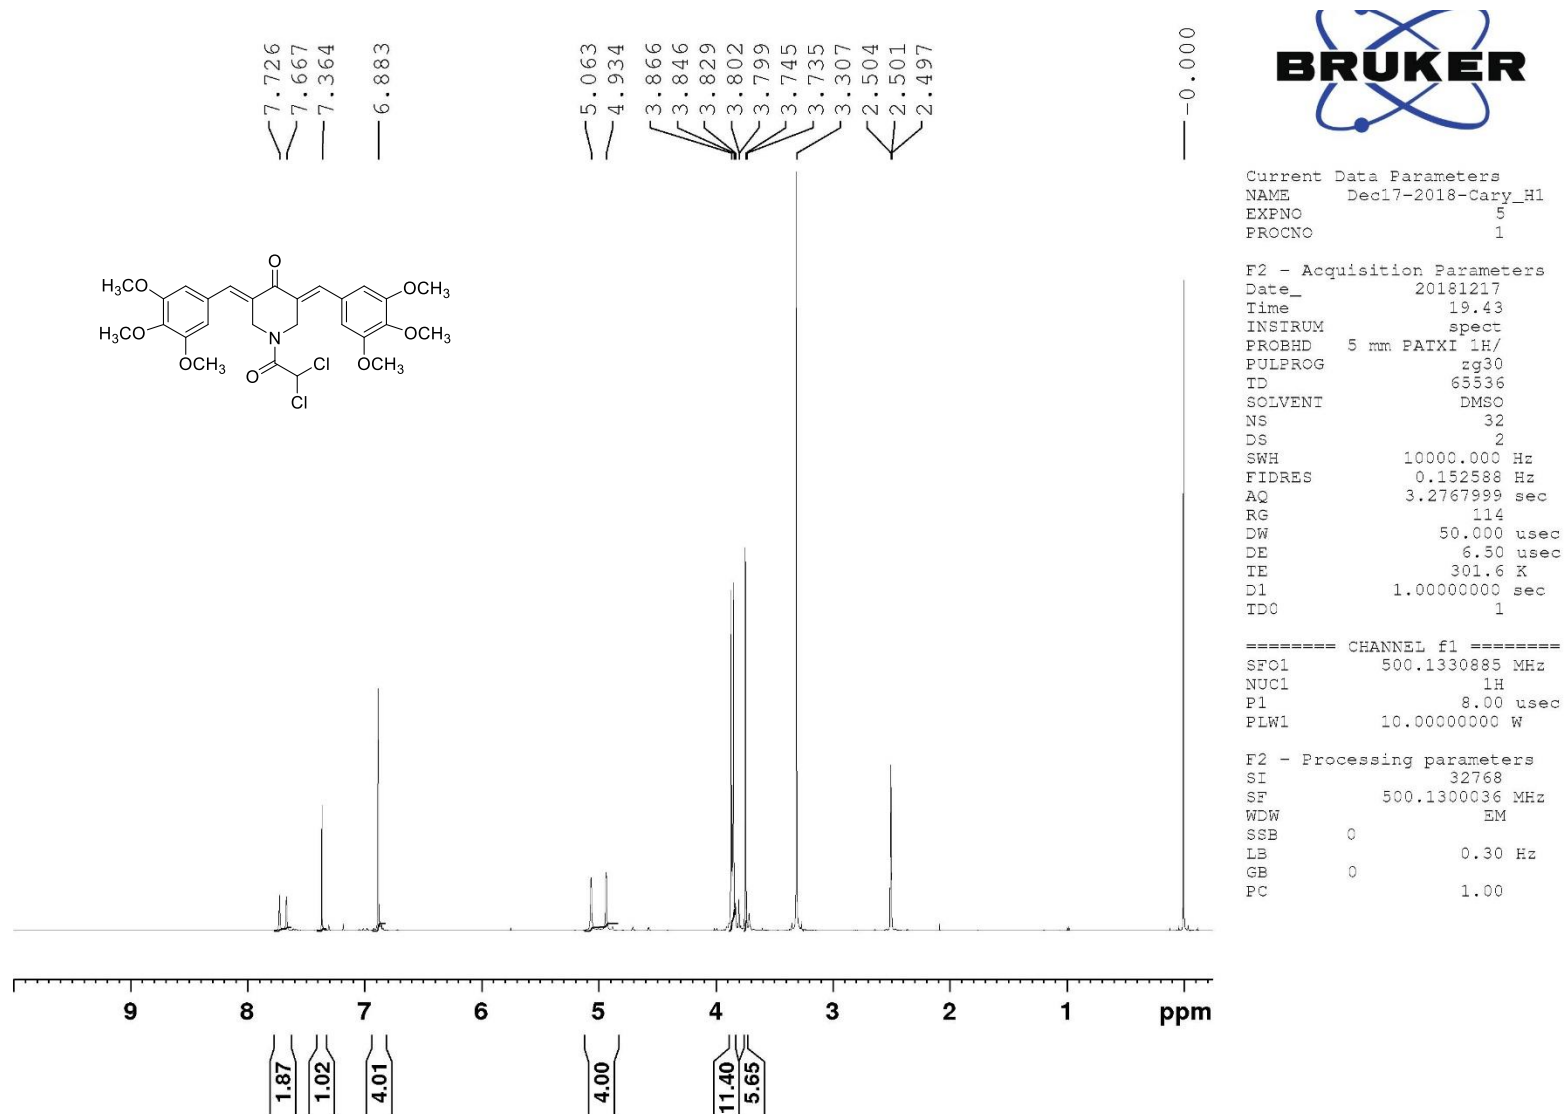

<sup>13</sup>C NMR ((CD<sub>3</sub>)<sub>2</sub>SO) spectrum of 1-(2,2-dichloroacetyl)-3,5-bis((*E*)-3,4,5-trimethoxybenzylidene)piperidin-4-one (**1h**)

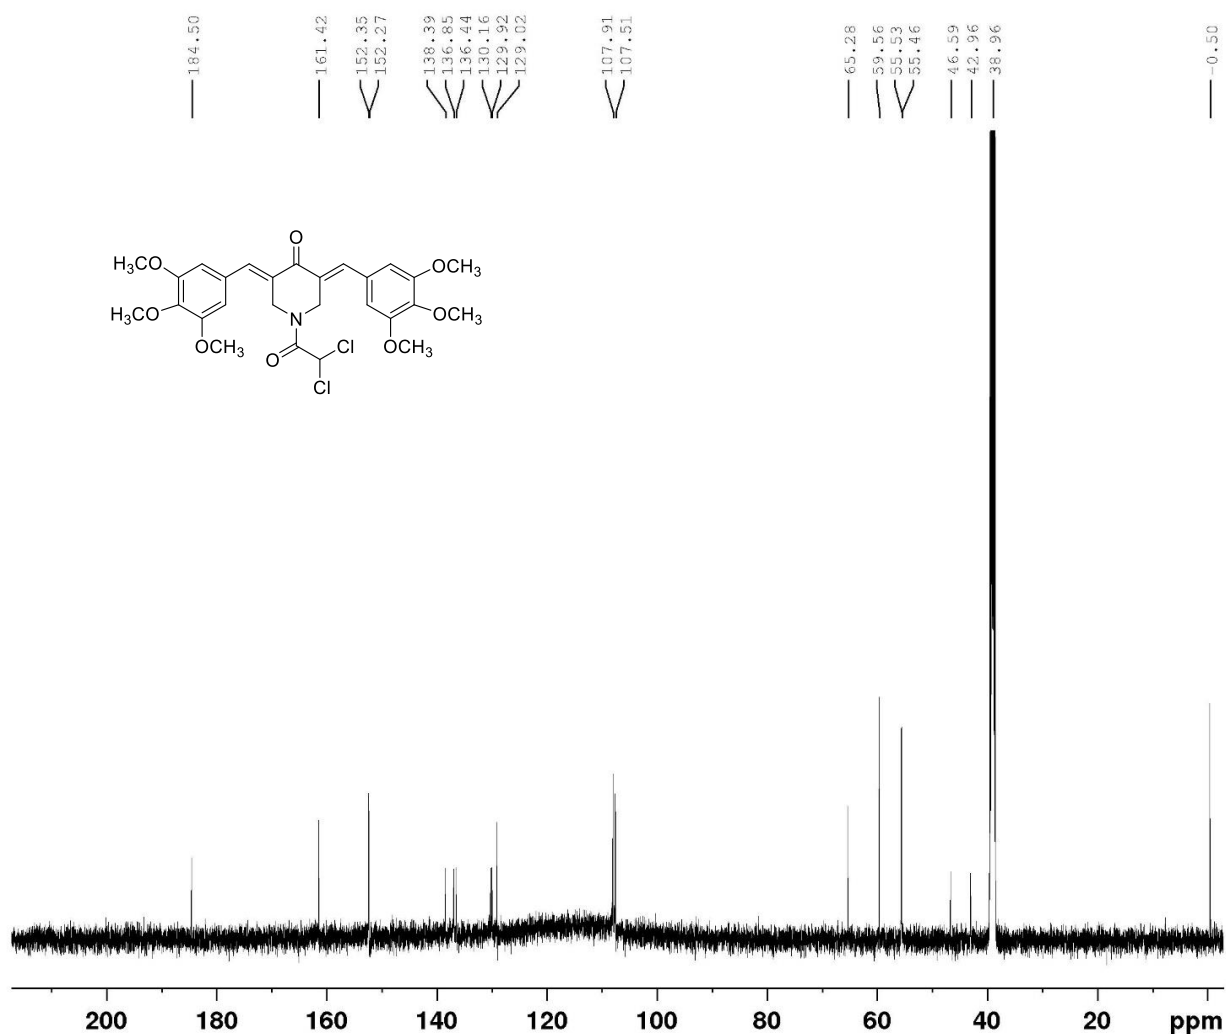

Current Data Parameters  
NAME Dec17-2018-Cary\_C13  
EXPNO 7  
PROCNO 1

F2 - Acquisition Parameters  
Date\_ 20181217  
Time 21.32  
INSTRUM spect  
PROBHD 5 mm PATXI 1H/  
PULPROG zgpg30  
TD 65536  
SOLVENT DMSO  
NS 2048  
DS 4  
SWH 29761.904 Hz  
FIDRES 0.454131 Hz  
AQ 1.1010048 sec  
RG 362  
DW 16.800 usec  
DE 6.50 usec  
TE 302.5 K  
D1 2.00000000 sec  
D11 0.03000000 sec  
TD0 1

===== CHANNEL f1 =====  
SFO1 125.7703637 MHz  
NUC1 13C  
P1 12.00 usec  
PLW1 180.0000000 W

===== CHANNEL f2 =====  
SFO2 500.1320005 MHz  
NUC2 1H  
CPDPRG[2] waltz16  
PCPD2 80.00 usec  
PLW2 10.00000000 W  
PLW12 0.10000000 W  
PLW13 0.06400000 W

F2 - Processing parameters  
SI 32768  
SF 125.7579232 MHz  
WDW EM  
SSB 0  
LB 1.00 Hz  
GB 0  
PC 1.40

Mass spectrum of 1-(2,2-dichloroacetyl)-3,5-bis((*E*)-3,4,5-trimethoxybenzylidene)piperidin-4-one (**1h**)

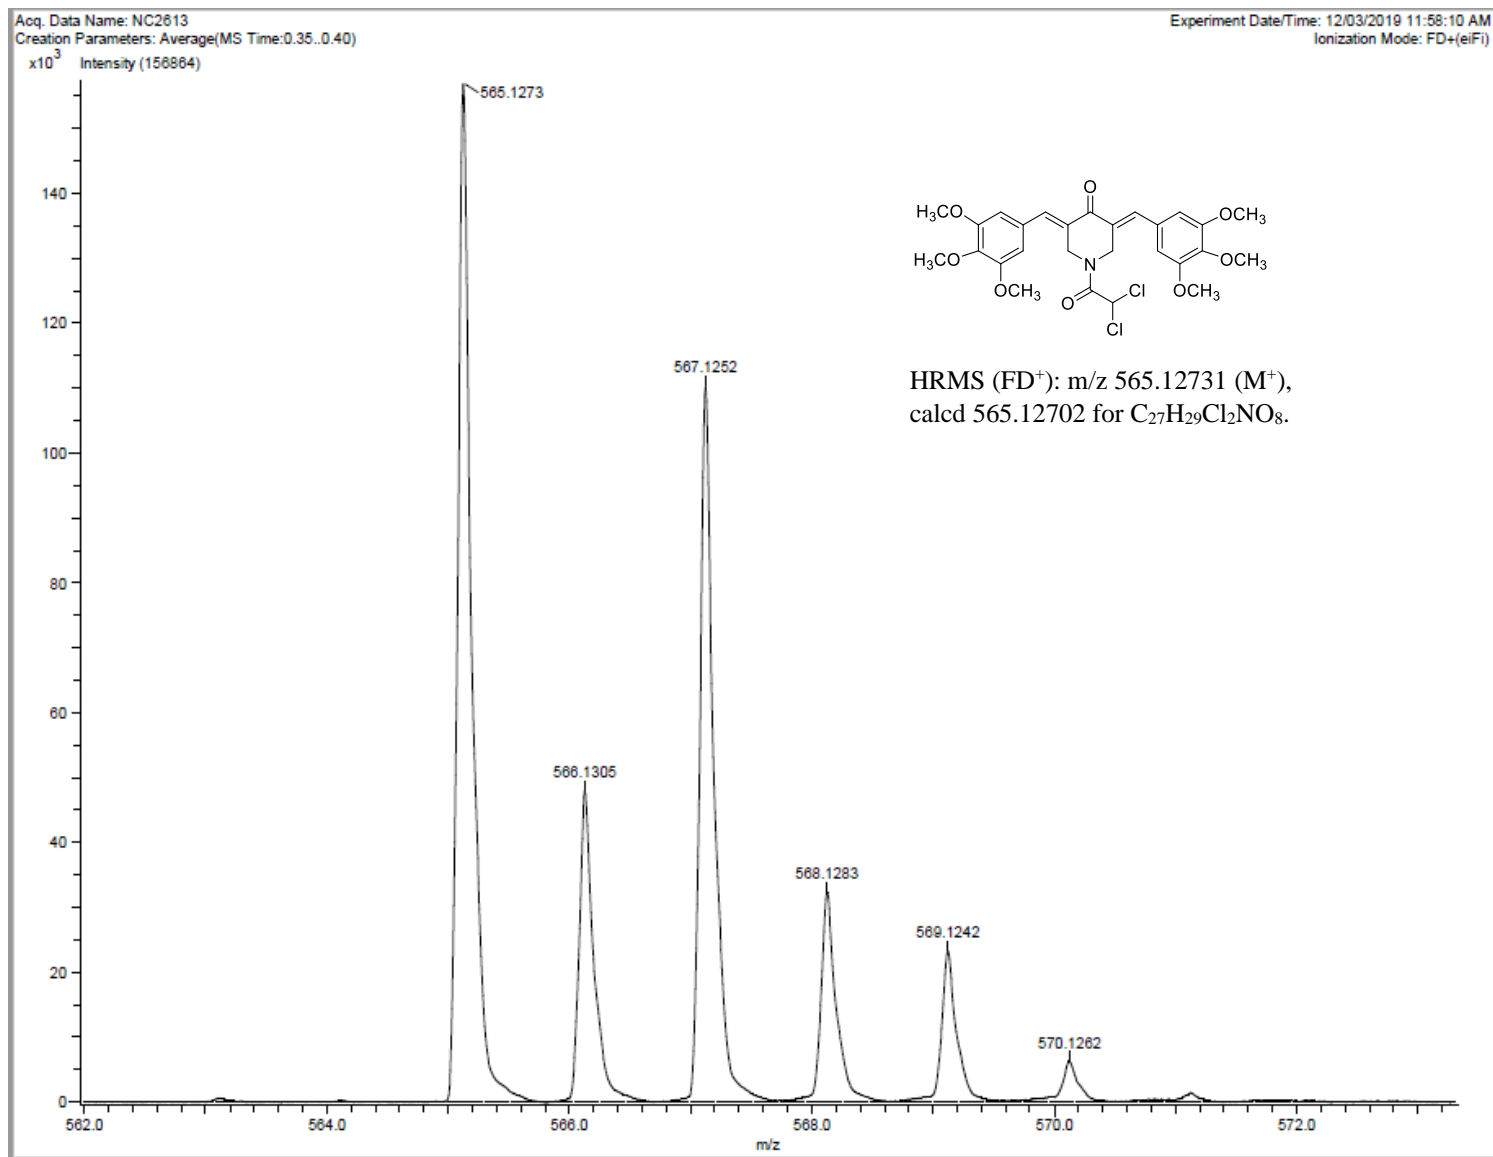

<sup>1</sup>H NMR ((CD<sub>3</sub>)<sub>2</sub>SO) spectrum of 1-(2,2-dichloroacetyl)-3,5-bis((*E*)-3,4-methylenedioxybenzylidene)piperidin-4-one (**1i**)

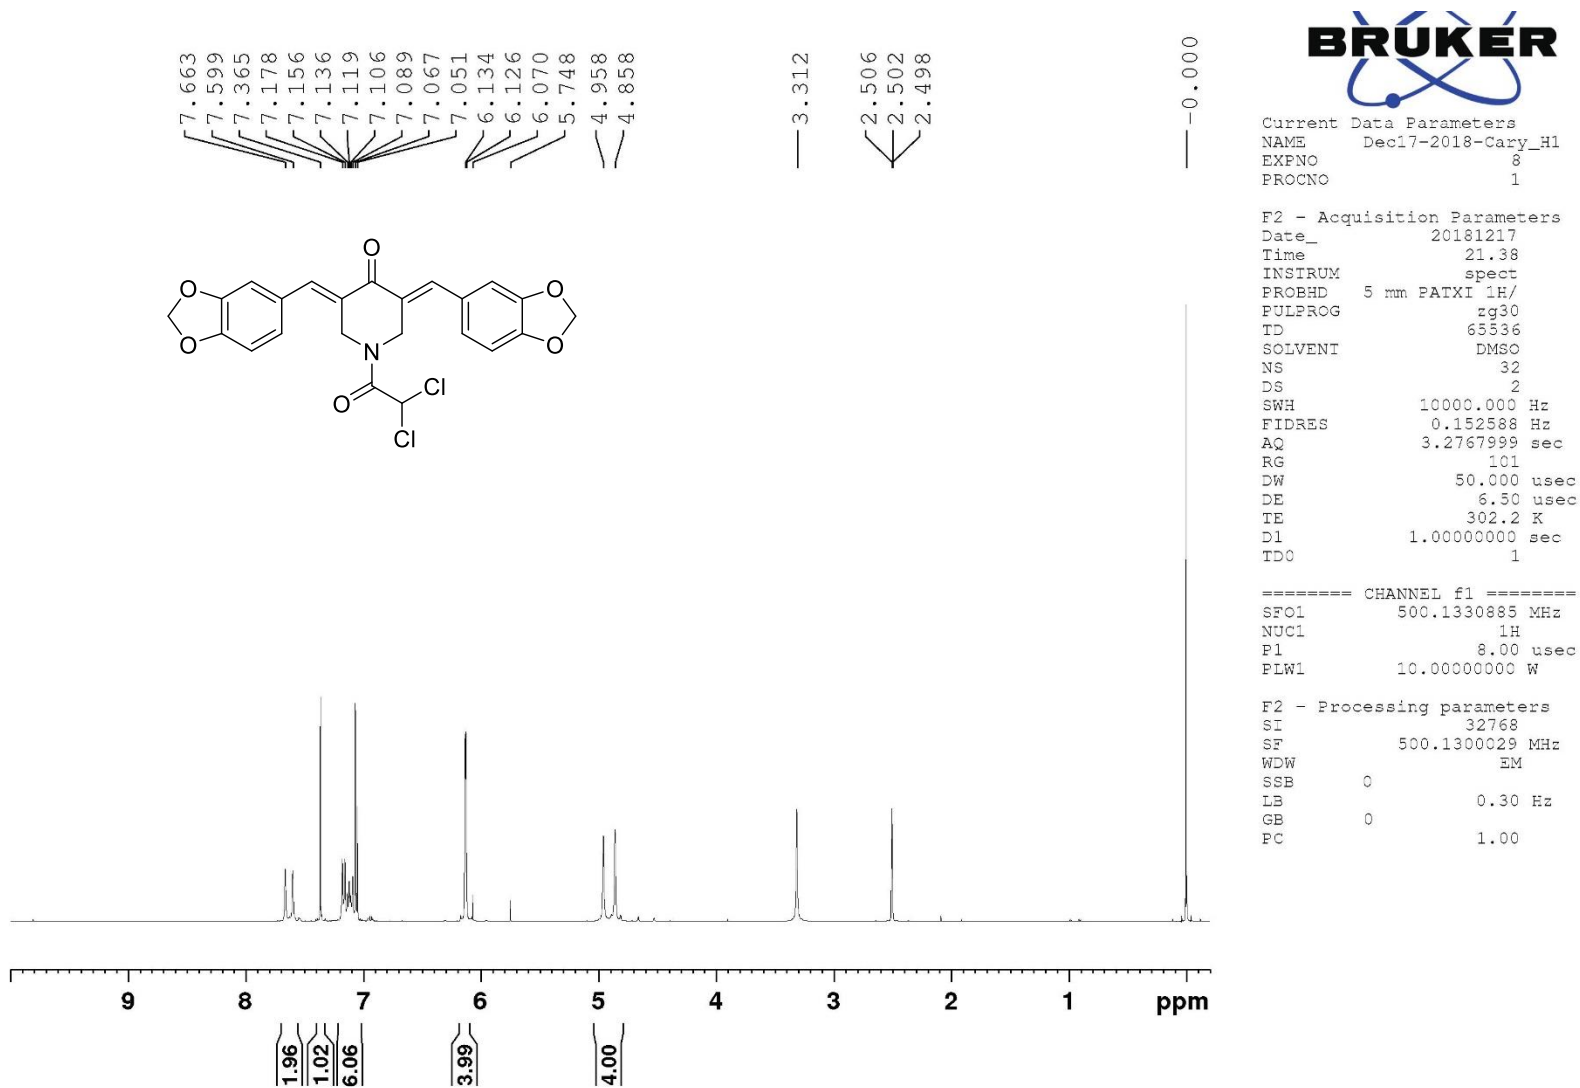

<sup>13</sup>C NMR ((CD<sub>3</sub>)<sub>2</sub>SO) spectrum of 1-(2,2-dichloroacetyl)-3,5-bis((*E*)-3,4-methylenedioxybenzylidene)piperidin-4-one (**1i**)

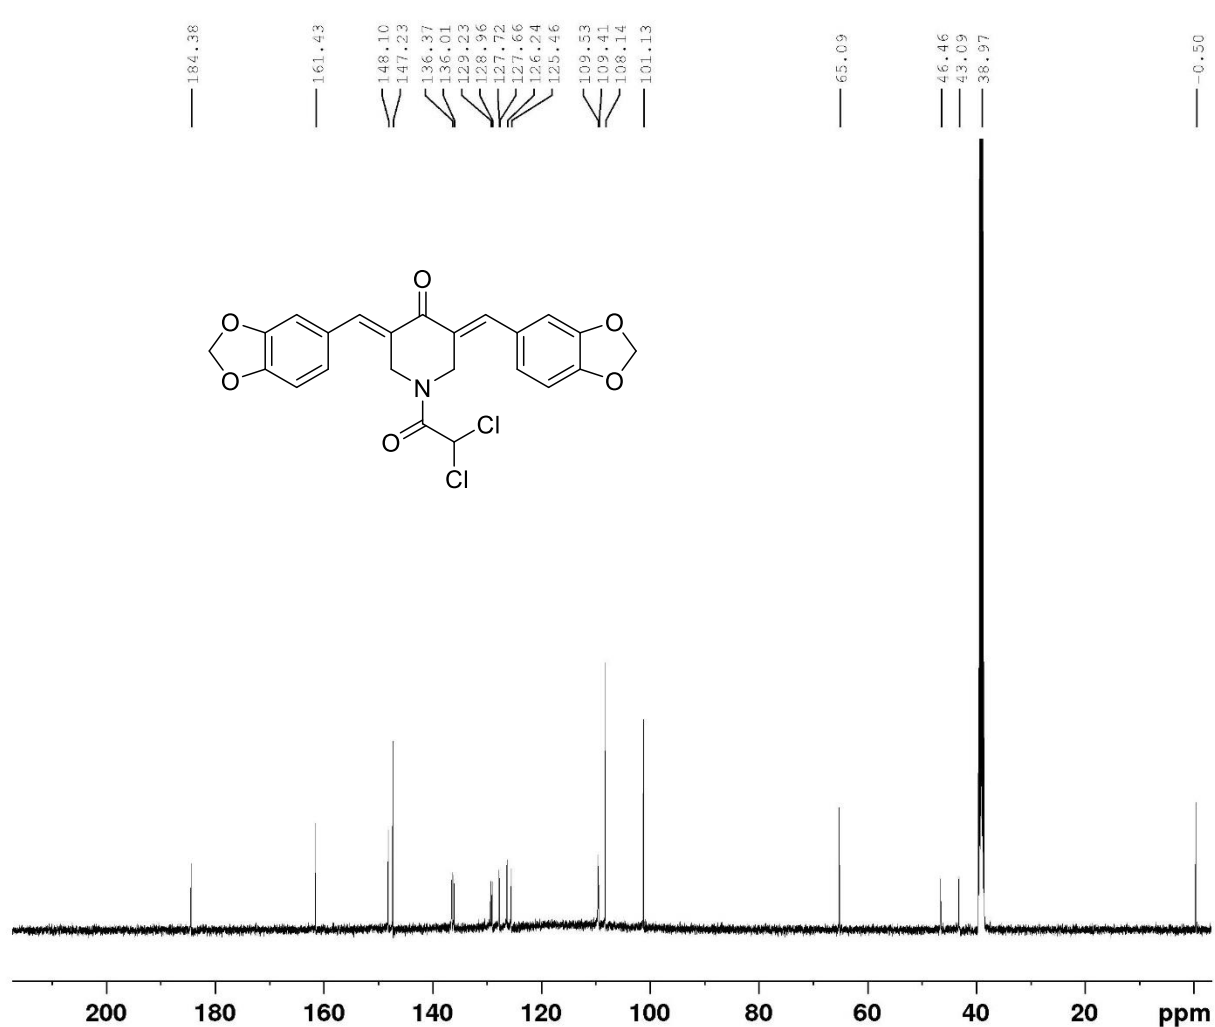

Current Data Parameters  
NAME Dec17-2018-Cary\_H1  
EXPNO 9  
PROCNO 1

F2 - Acquisition Parameters  
Date\_ 20181217  
Time 23.27  
INSTRUM spect  
PROBHD 5 mm PATXI 1H/  
PULPROG zgpg30  
TD 65536  
SOLVENT DMSO  
NS 2048  
DS 4  
SWH 29761.904 Hz  
FIDRES 0.454131 Hz  
AQ 1.1010048 sec  
RG 575  
DW 16.800 usec  
DE 6.50 usec  
TE 302.8 K  
D1 2.00000000 sec  
D11 0.03000000 sec  
TD0 1

===== CHANNEL f1 =====  
SFO1 125.7703637 MHz  
NUC1 13C  
P1 12.00 usec  
PLW1 180.00000000 W

===== CHANNEL f2 =====  
SFO2 500.1320005 MHz  
NUC2 1H  
CPDPRG[2] waltz16  
PCPD2 80.00 usec  
PLW2 10.00000000 W  
PLW12 0.10000000 W  
PLW13 0.06400000 W

F2 - Processing parameters  
SI 32768  
SF 125.7579226 MHz  
WDW EM  
SSB 0  
LB 1.00 Hz  
GB 0  
PC 1.40

Mass spectrum of 1-(2,2-dichloroacetyl)-3,5-bis((*E*)-3,4-methylenedioxybenzylidene)piperidin-4-one (**1i**)

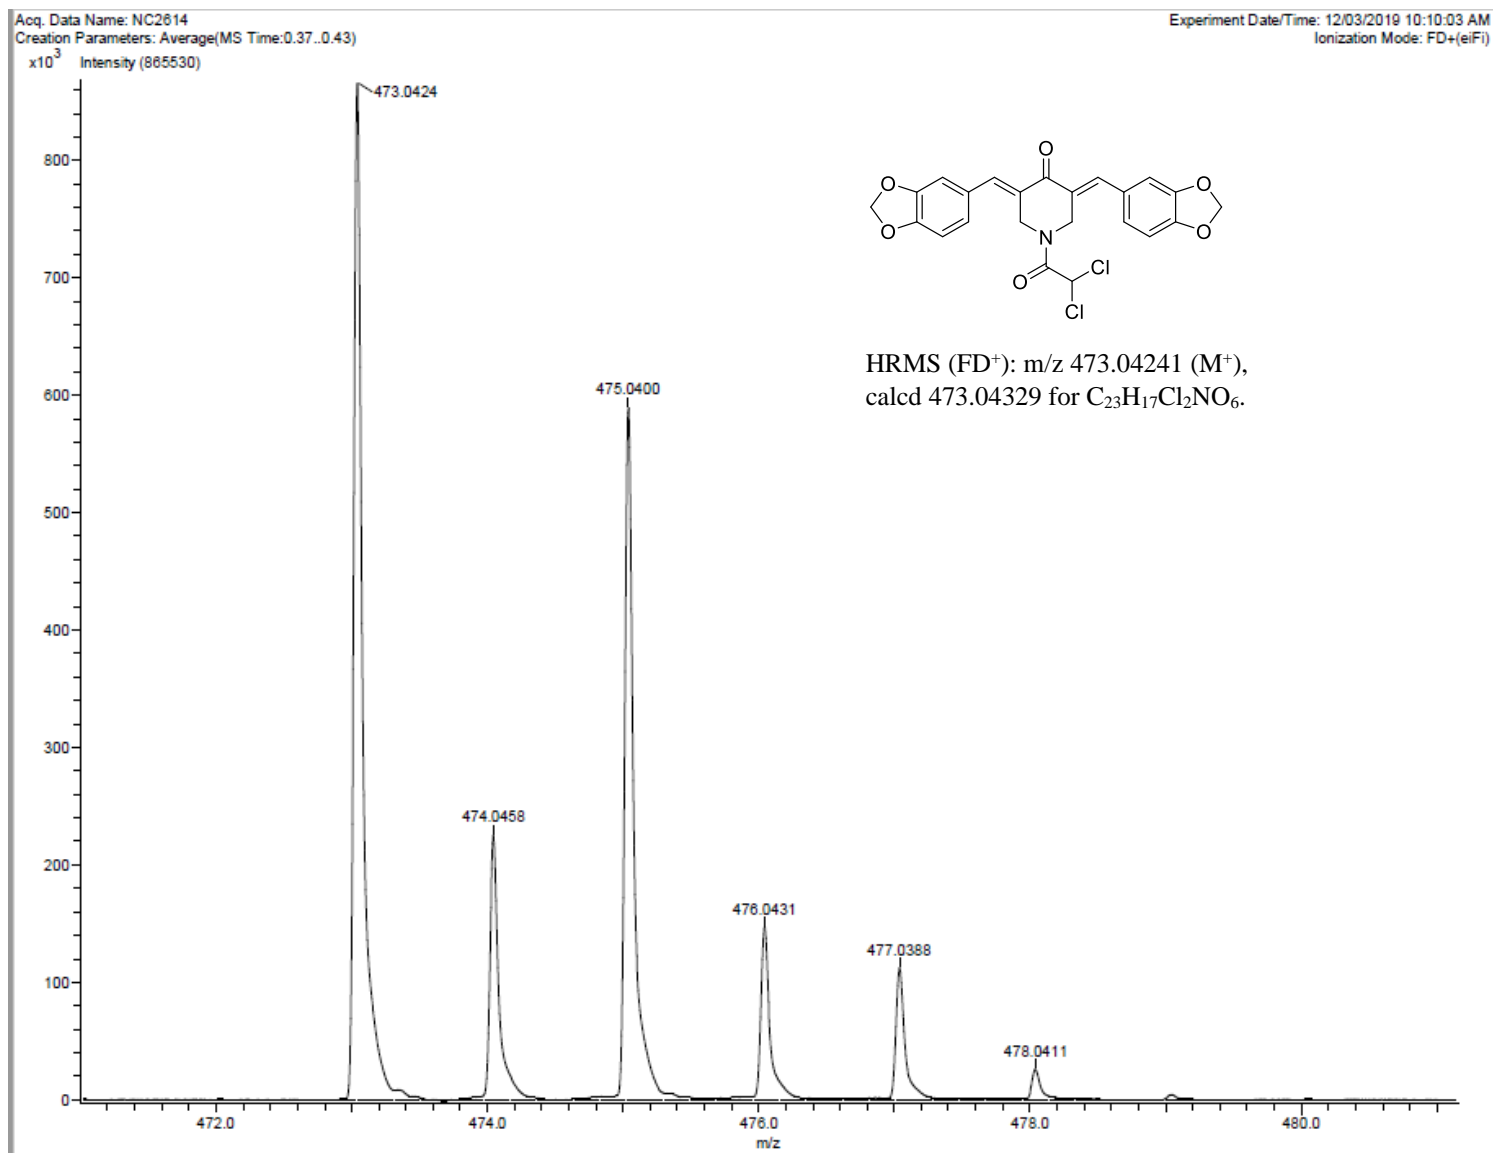

$^1\text{H}$  NMR ( $\text{CDCl}_3$ ) spectrum of 1-(2,2-dichloroacetyl)-3,5-bis((*E*)-4-methylbenzylidene)piperidin-4-one (**1j**)

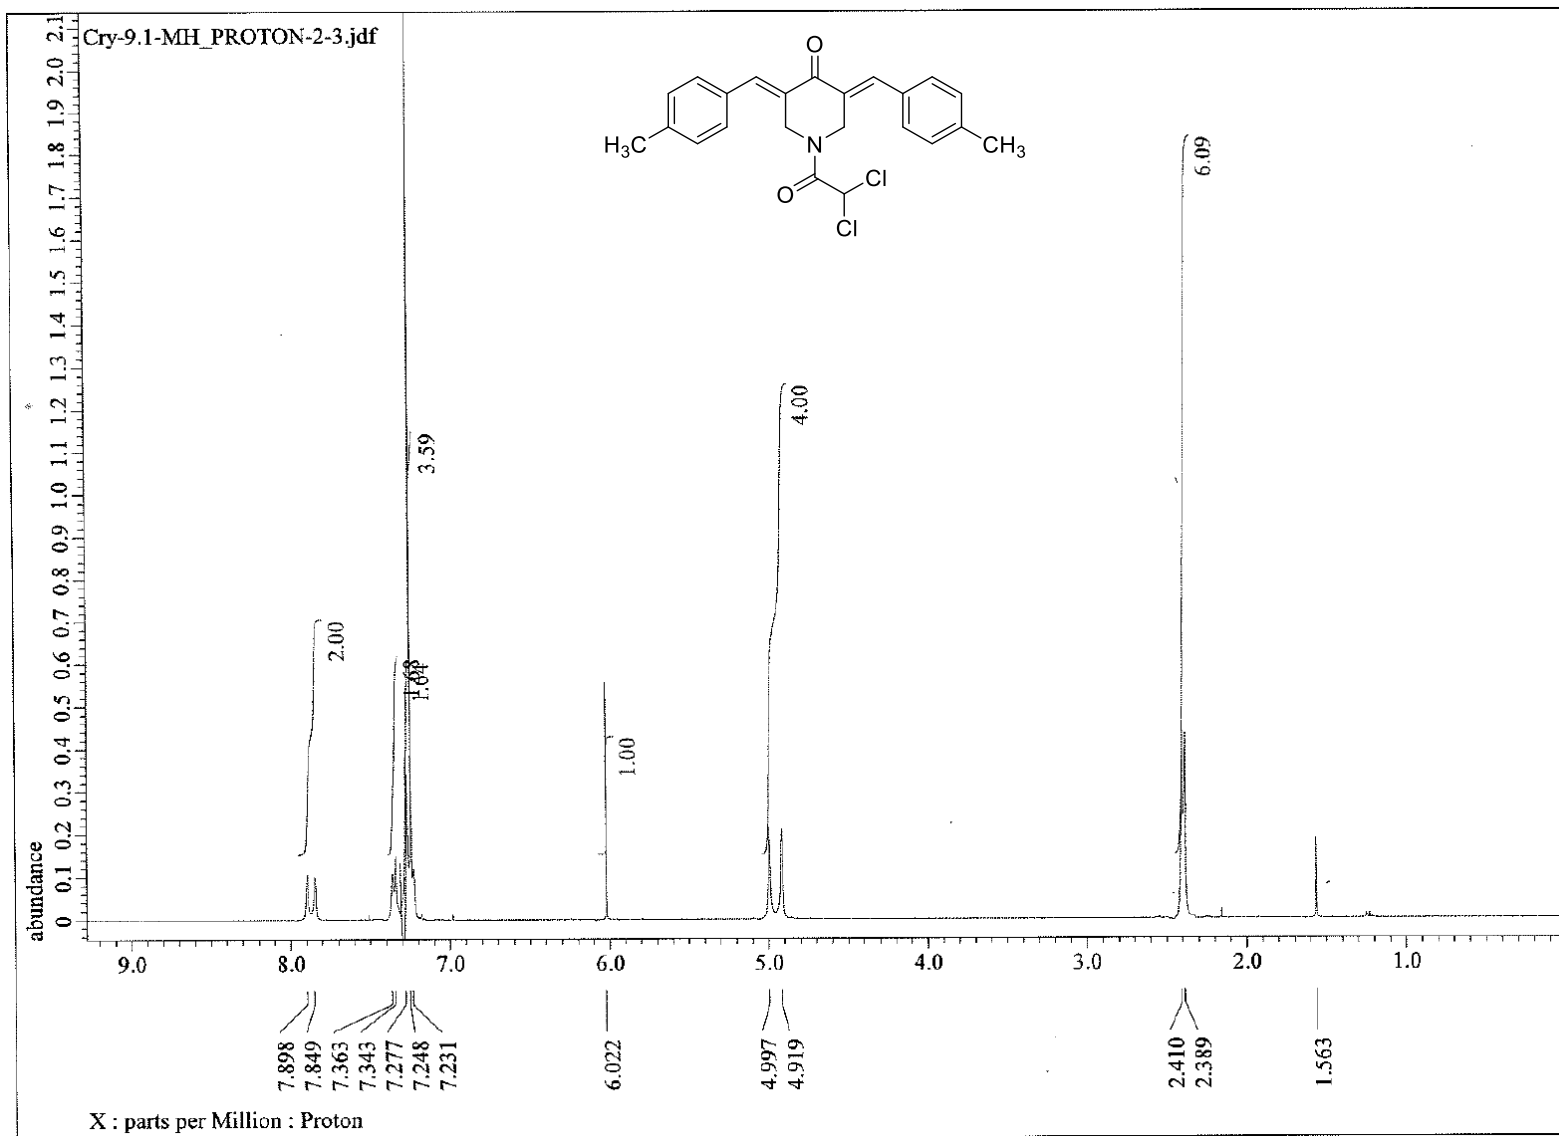

$^{13}\text{C}$  NMR ( $\text{CDCl}_3$ ) spectrum of 1-(2,2-dichloroacetyl)-3,5-bis((*E*-4-methylbenzylidene)piperidin-4-one (**1j**)

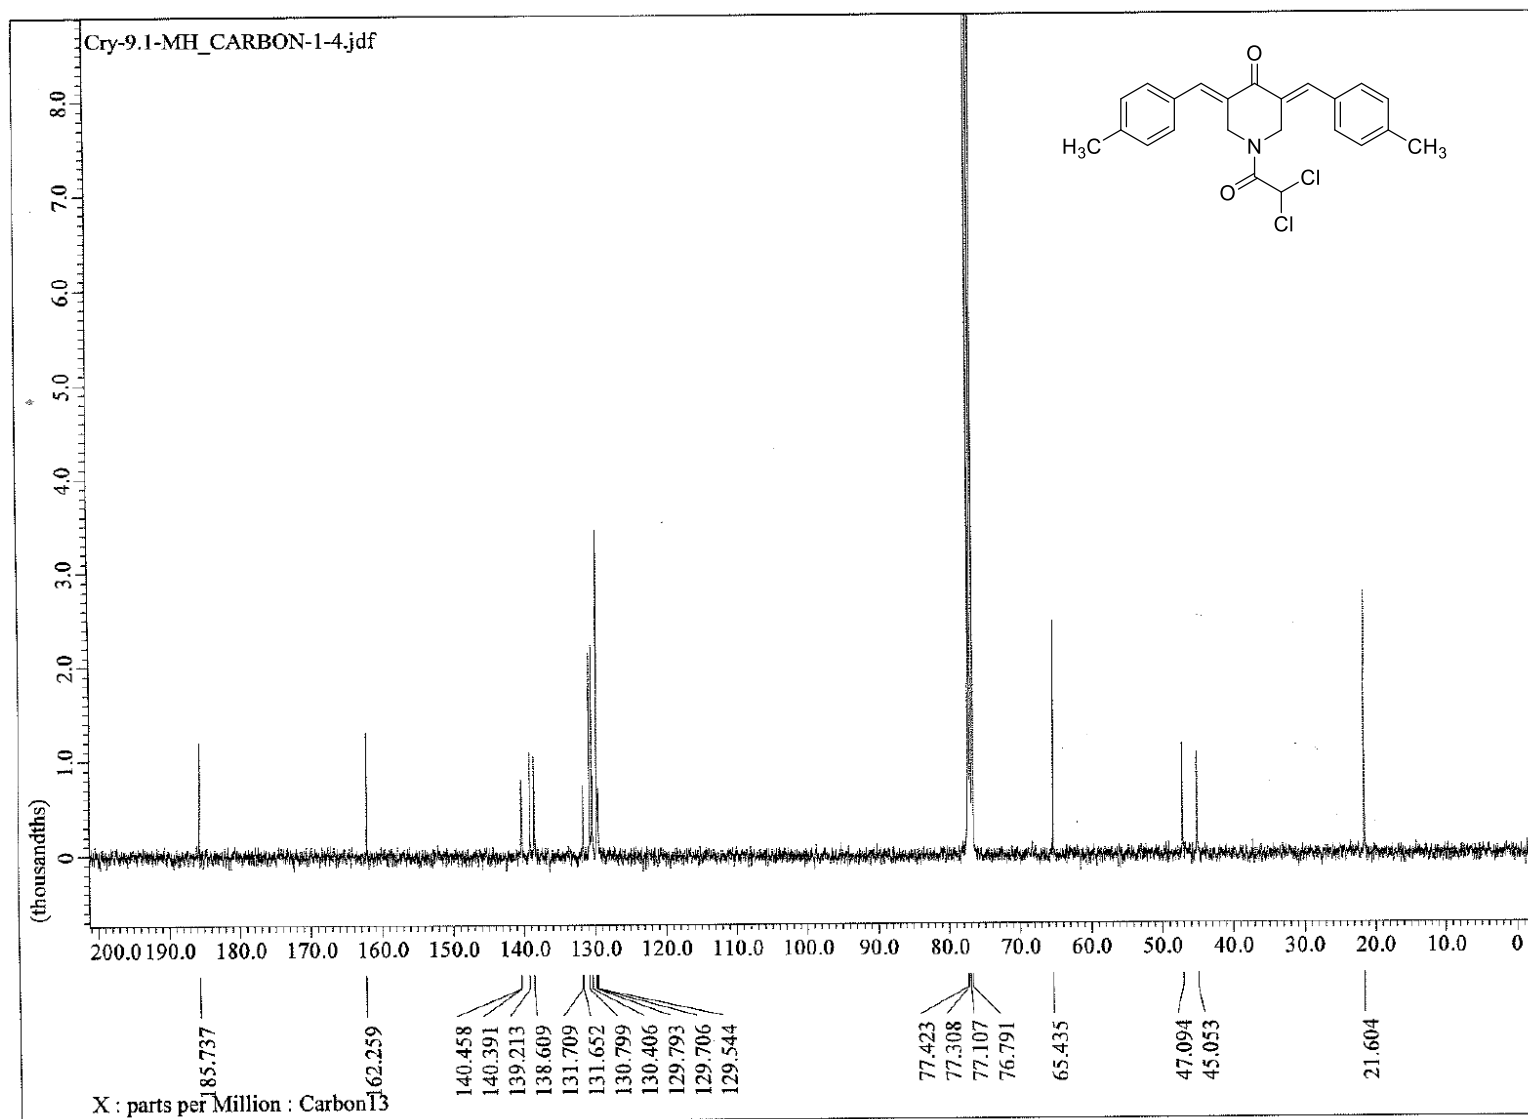



Mass spectrum of 1-(2,2-dichloroacetyl)-3,5-bis((*E*)-4-methylbenzylidene)piperidin-4-one (**1j**)

Acq. Data Name: NC2604

Creation Parameters: Average(MS Time:0.33..0.37)

Experiment Date/Time: 2/20/2019 1:51:00 PM

Ionization Mode: FD+(eiFi)

$\times 10^3$  Intensity (178375)

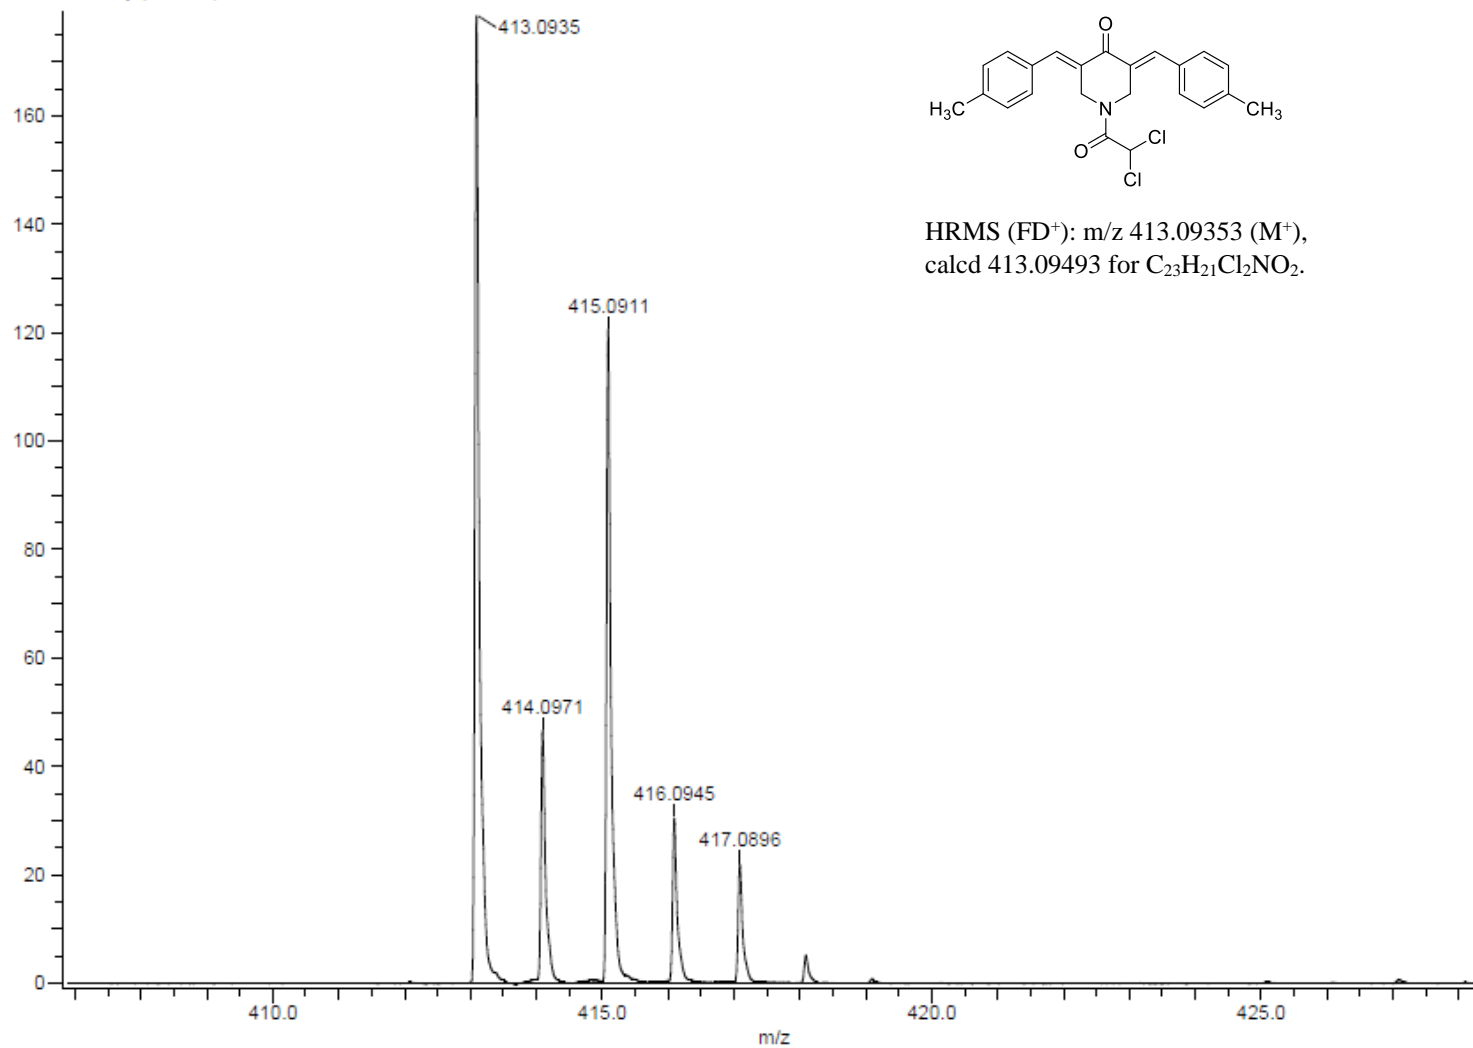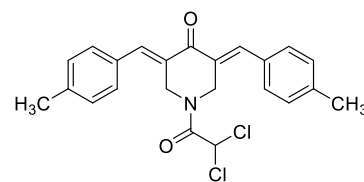

HRMS (FD<sup>+</sup>):  $m/z$  413.09353 ( $M^+$ ),  
calcd 413.09493 for  $C_{23}H_{21}Cl_2NO_2$ .

<sup>1</sup>H NMR ((CD<sub>3</sub>)<sub>2</sub>SO) spectrum of 1-(2,2-dichloroacetyl)-3,5-bis((E)-4-nitrobenzylidene)piperidin-4-one (**1k**)

Cry-44.1-MH\_NO2\_1H\_Full

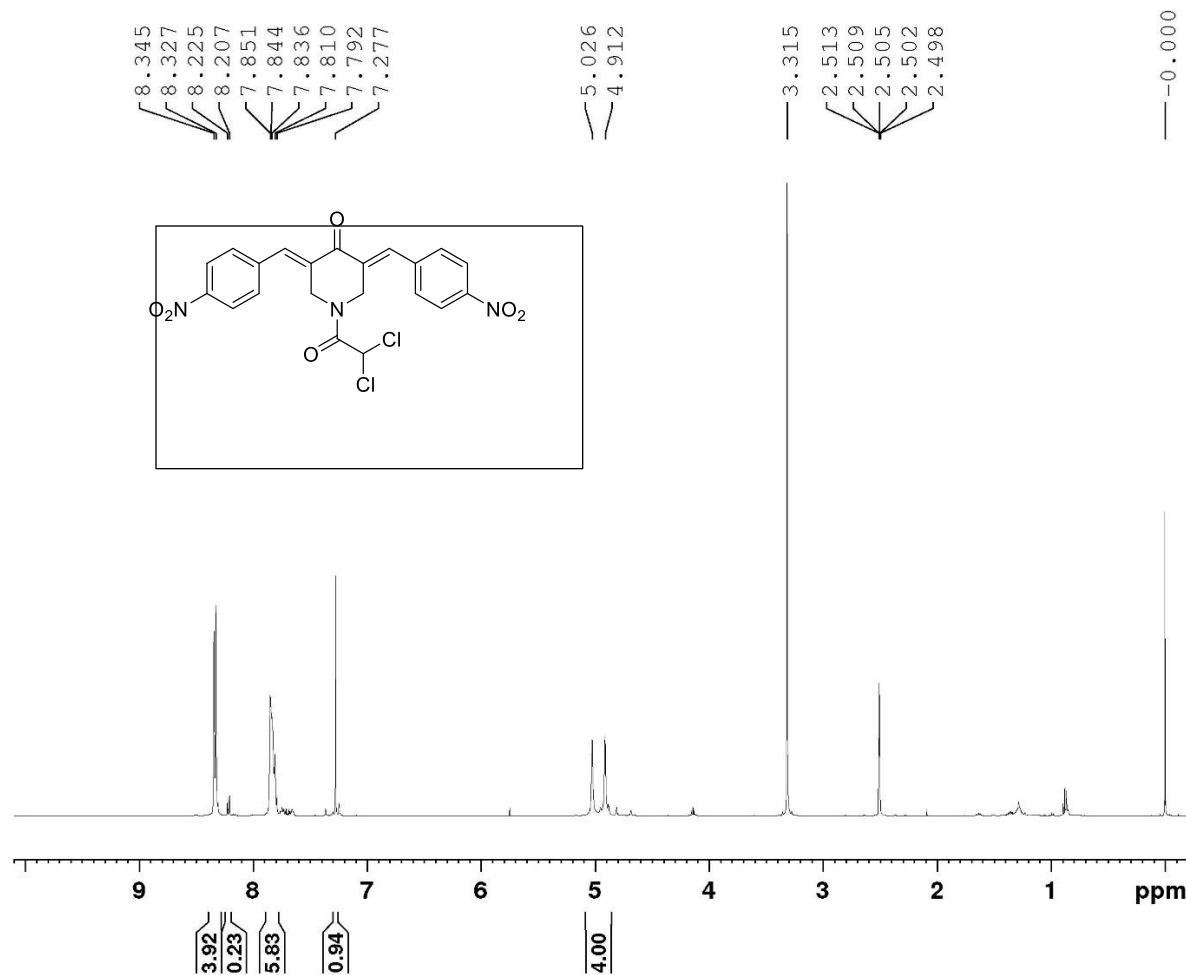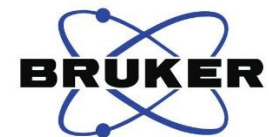

Current Data Parameters  
NAME Dec17-2018-Cary  
EXPNO 1  
PROCNO 1

F2 - Acquisition Parameters  
Date\_ 20181217  
Time 15.52  
INSTRUM spect  
PROBHD 5 mm PATXI 1H/  
PULPROG zg30  
TD 65536  
SOLVENT DMSO  
NS 128  
DS 2  
SWH 10000.000 Hz  
FIDRES 0.152588 Hz  
AQ 3.2767999 sec  
RG 101  
DW 50.000 usec  
DE 6.50 usec  
TE 301.9 K  
D1 1.00000000 sec  
TD0 1

----- CHANNEL f1 -----  
SFO1 500.1330885 MHz  
NUC1 1H  
P1 8.00 usec  
PLW1 10.00000000 W

F2 - Processing parameters  
SI 32768  
SF 500.1300013 MHz  
WDW EM  
SSB 0  
LB 0.30 Hz  
GB 0  
PC 1.00

<sup>13</sup>C NMR ((CD<sub>3</sub>)<sub>2</sub>SO) spectrum of 1-(2,2-dichloroacetyl)-3,5-bis((*E*)-4-nitrobenzylidene)piperidin-4-one (**1k**)

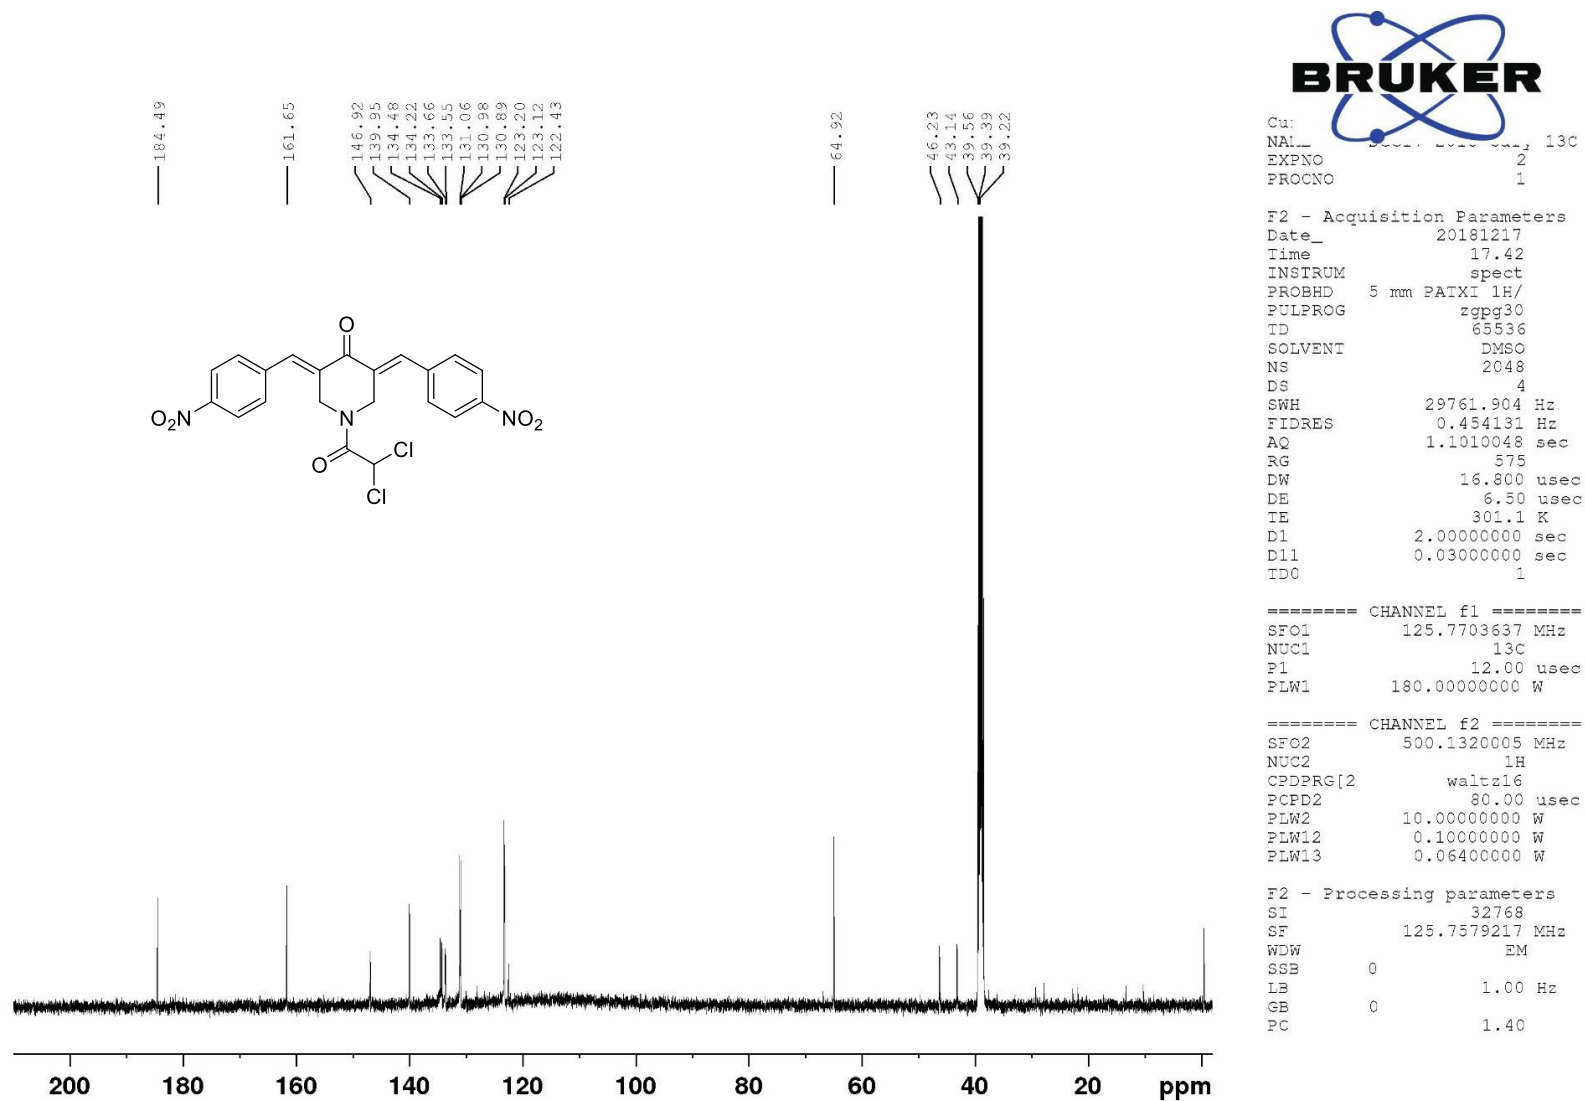

Mass spectrum of 1-(2,2-dichloroacetyl)-3,5-bis((*E*)-4-nitrobenzylidene)piperidin-4-one (**1k**)

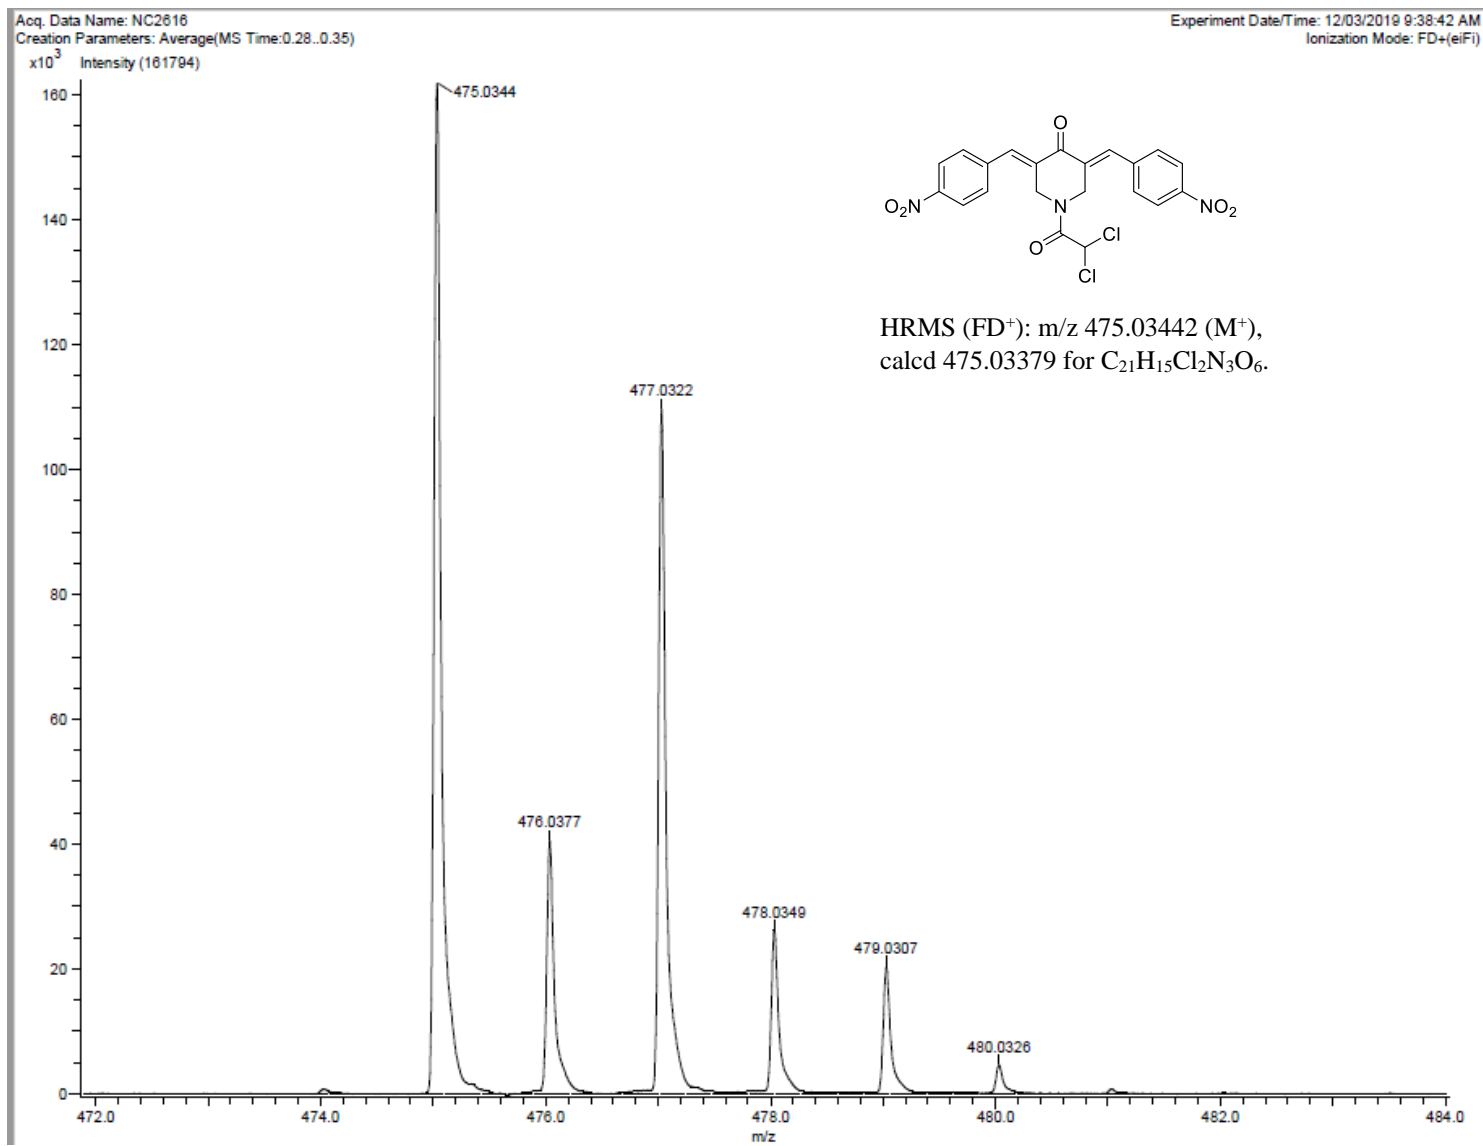

<sup>1</sup>H NMR (CDCl<sub>3</sub>) spectrum of 1-(2,2-dichloroacetyl)-3,5-bis((E)-4-(dimethylamino)benzylidene)piperidin-4-one (11)

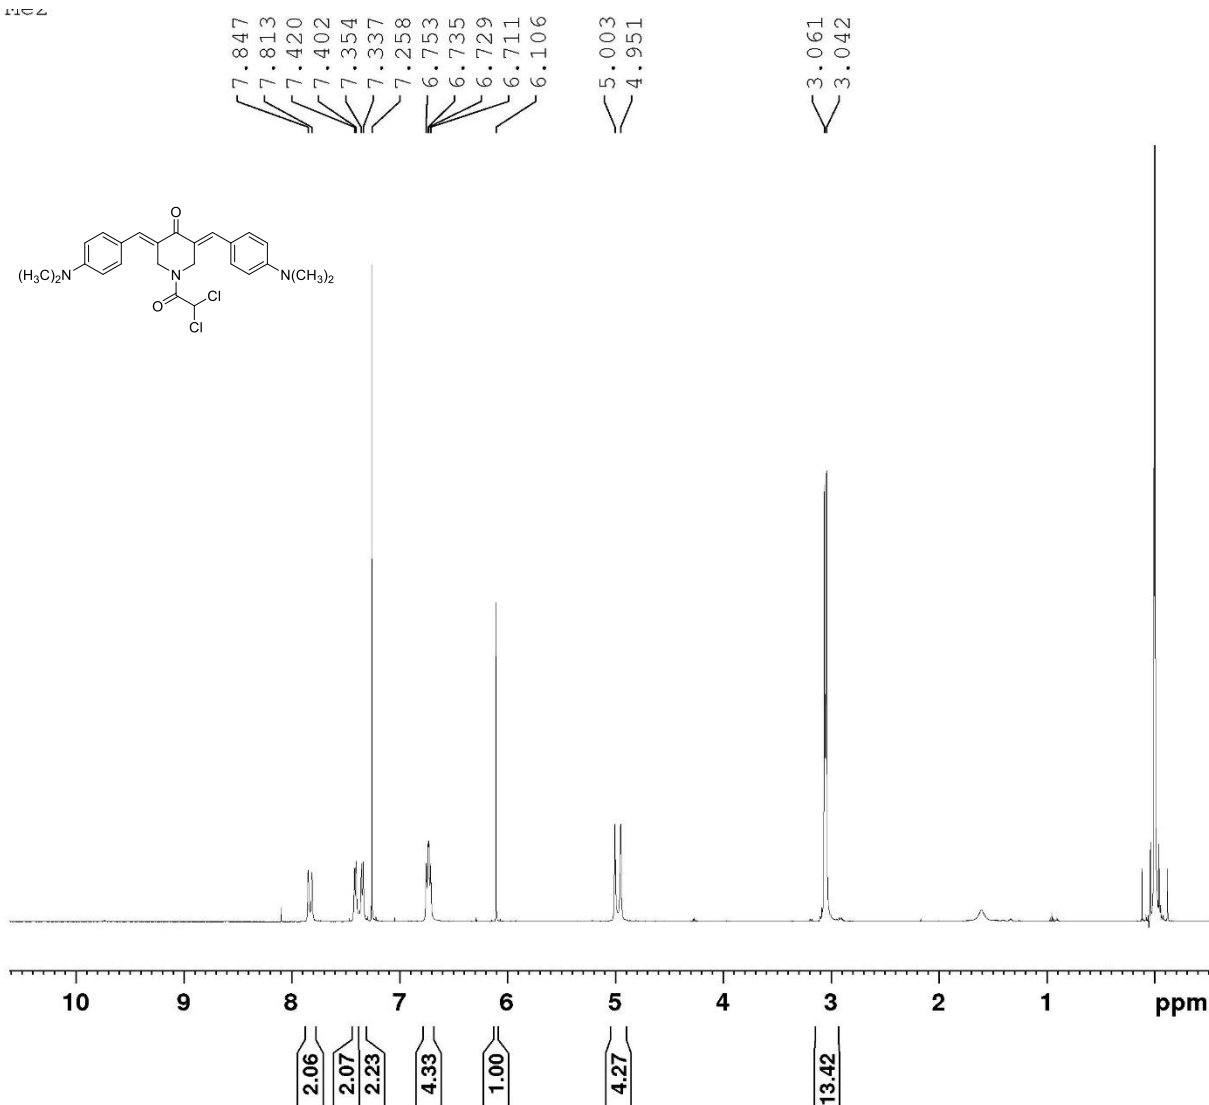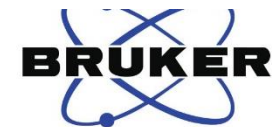

Current Data Parameters  
NAME 08-23-2018  
EXPNO 5  
PROCNO 1

F2 - Acquisition Parameters  
Date\_ 20180823  
Time 20.12  
INSTRUM spect  
PROBHD 5 mm PATXI 1H/  
PULPROG zg30  
TD 65536  
SOLVENT CDCl3  
NS 32  
DS 2  
SWH 10000.000 Hz  
FIDRES 0.152588 Hz  
AQ 3.2767999 sec  
RG 90.5  
DW 50.000 usec  
DE 6.50 usec  
TE 299.7 K  
D1 1.00000000 sec  
TD0 1

===== CHANNEL f1 =====  
SFO1 500.1330885 MHz  
NUC1 1H  
P1 8.00 usec  
PLW1 10.00000000 W

F2 - Processing parameters  
SI 32768  
SF 500.1300129 MHz  
WDW EM  
SSB 0  
LB 0.30 Hz  
GB 0  
PC 1.00

<sup>13</sup>C NMR (CDCl<sub>3</sub>) spectrum of 1-(2,2-dichloroacetyl)-3,5-bis((*E*-4-(dimethylamino)benzylidene)piperidin-4-one (**11**)

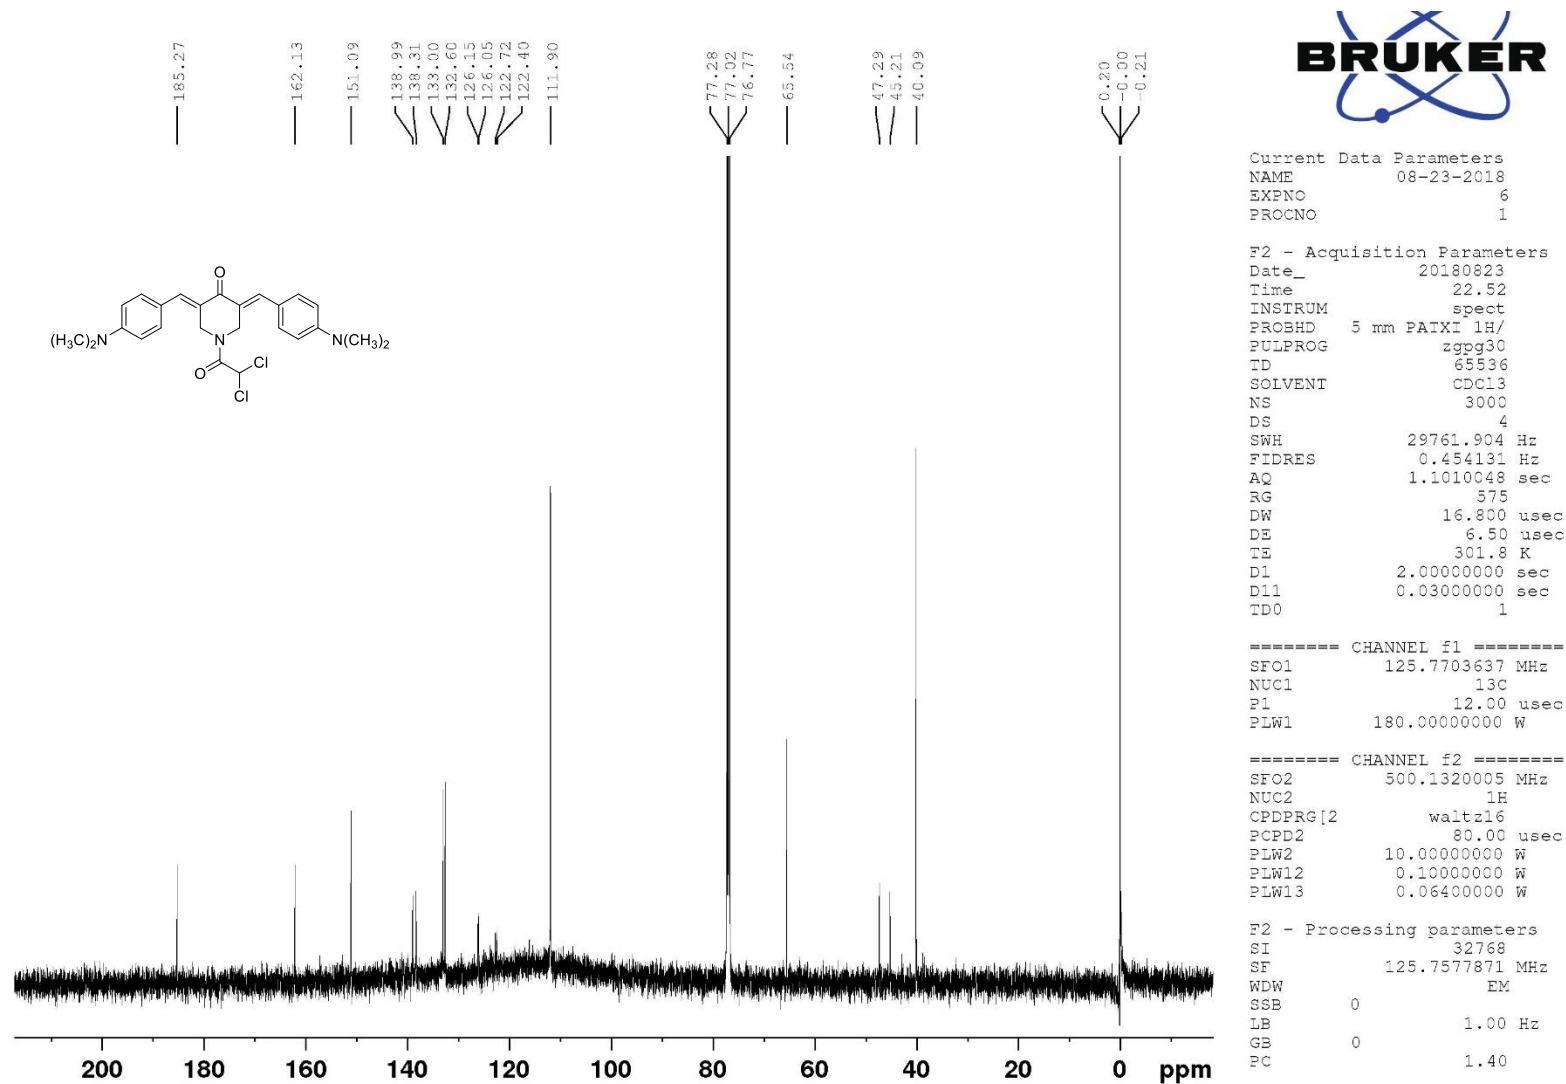

Mass spectrum of 1-(2,2-dichloroacetyl)-3,5-bis((E)-4-(dimethylamino)benzylidene)piperidin-4-one (**11**)

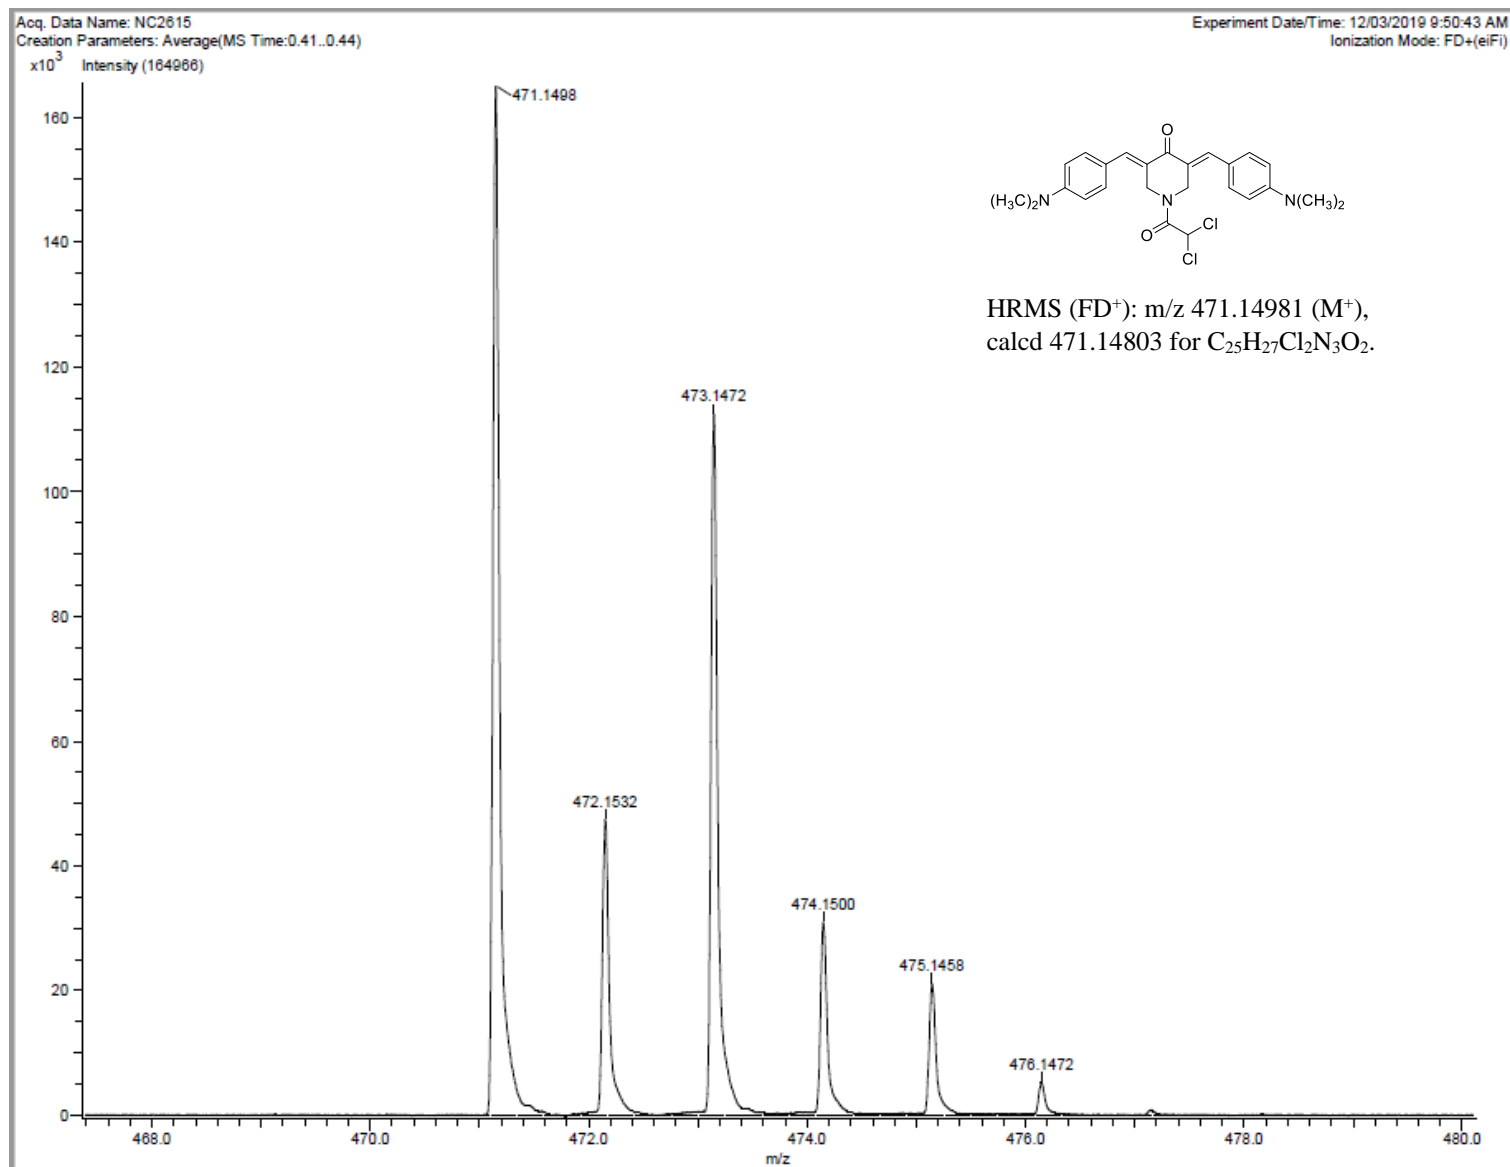

$^1\text{H}$  NMR ( $(\text{CD}_3)_2\text{SO}$ ) spectrum of 3,5-di((E)-benzylidene)piperidin-4-one (**2a**)

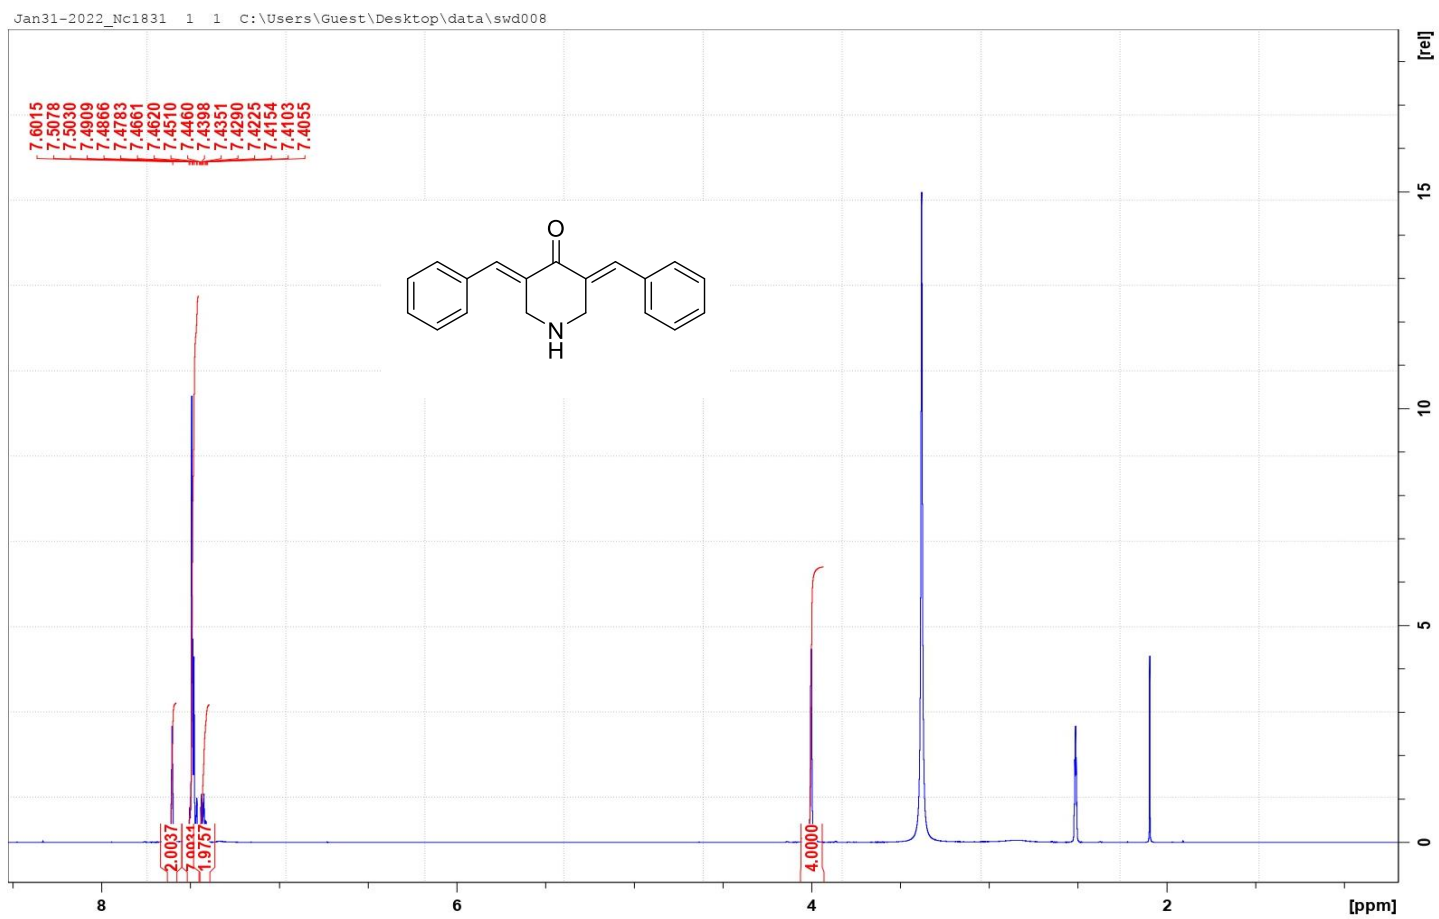



<sup>13</sup>C NMR ((CD<sub>3</sub>)<sub>2</sub>SO) spectrum of 3,5-di((E)-benzylidene)piperidin-4-one (**2a**)

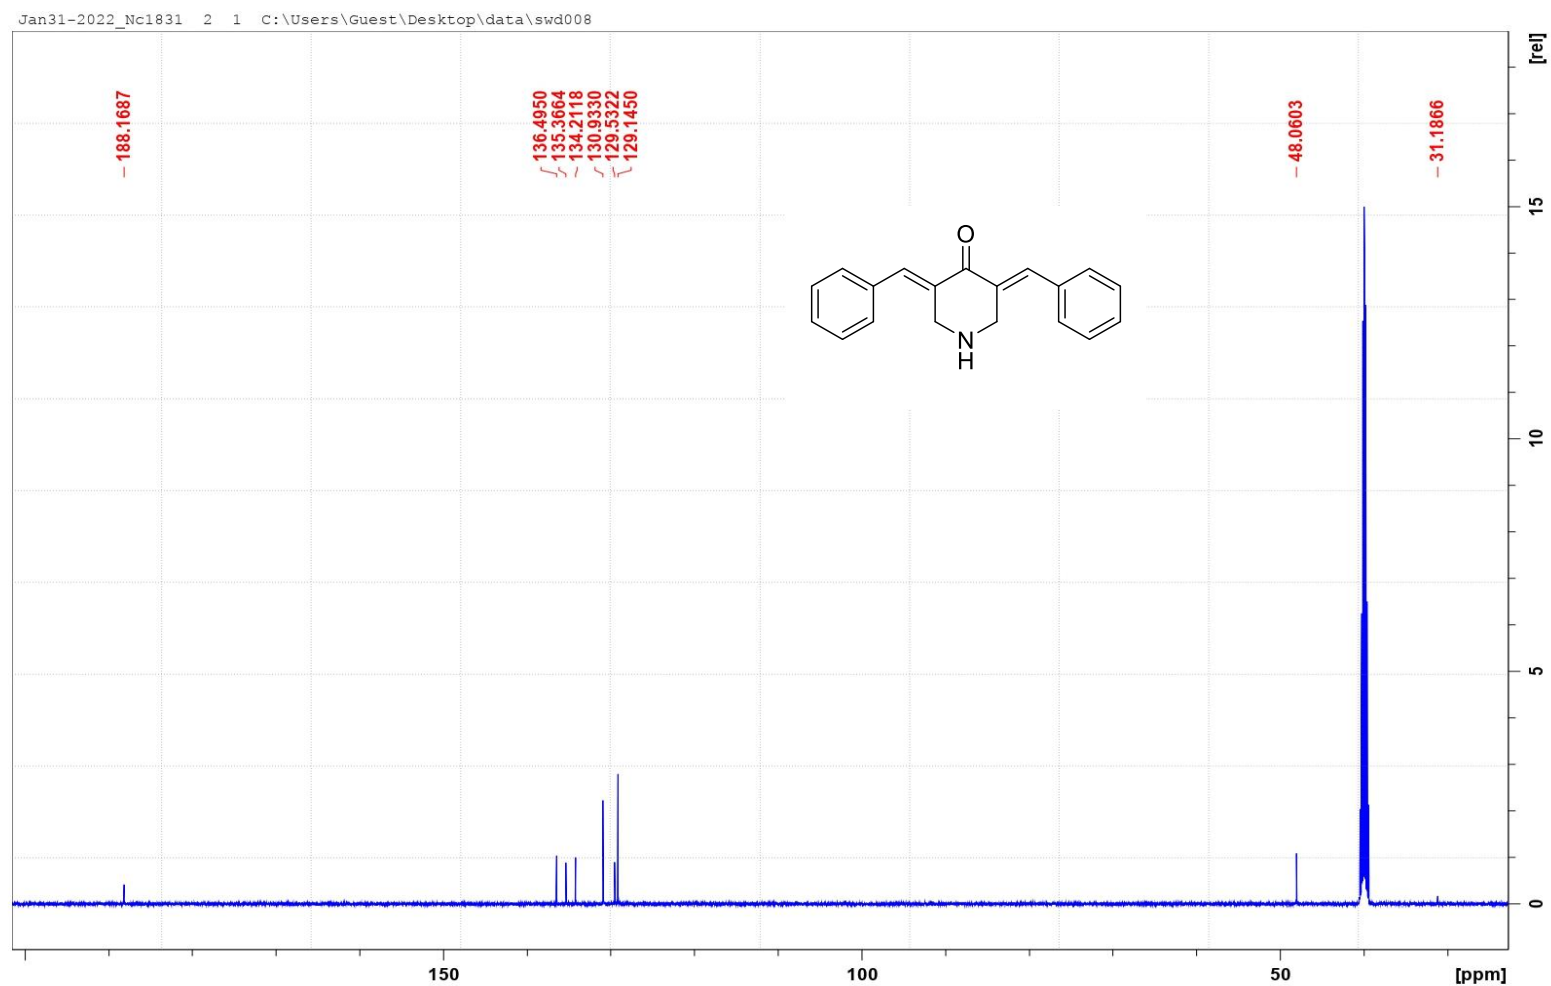

Mass spectrum of 3,5-di((E)-benzylidene)piperidin-4-one (**2a**)

Acq. Data Name: NC1831  
Creation Parameters: Average(MS Time:0.41..0.42)  
x10<sup>3</sup> Intensity (796251)

Experiment Date/Time: 2/1/2022 9:18:45 AM  
Ionization Mode: FD+(eiFi)

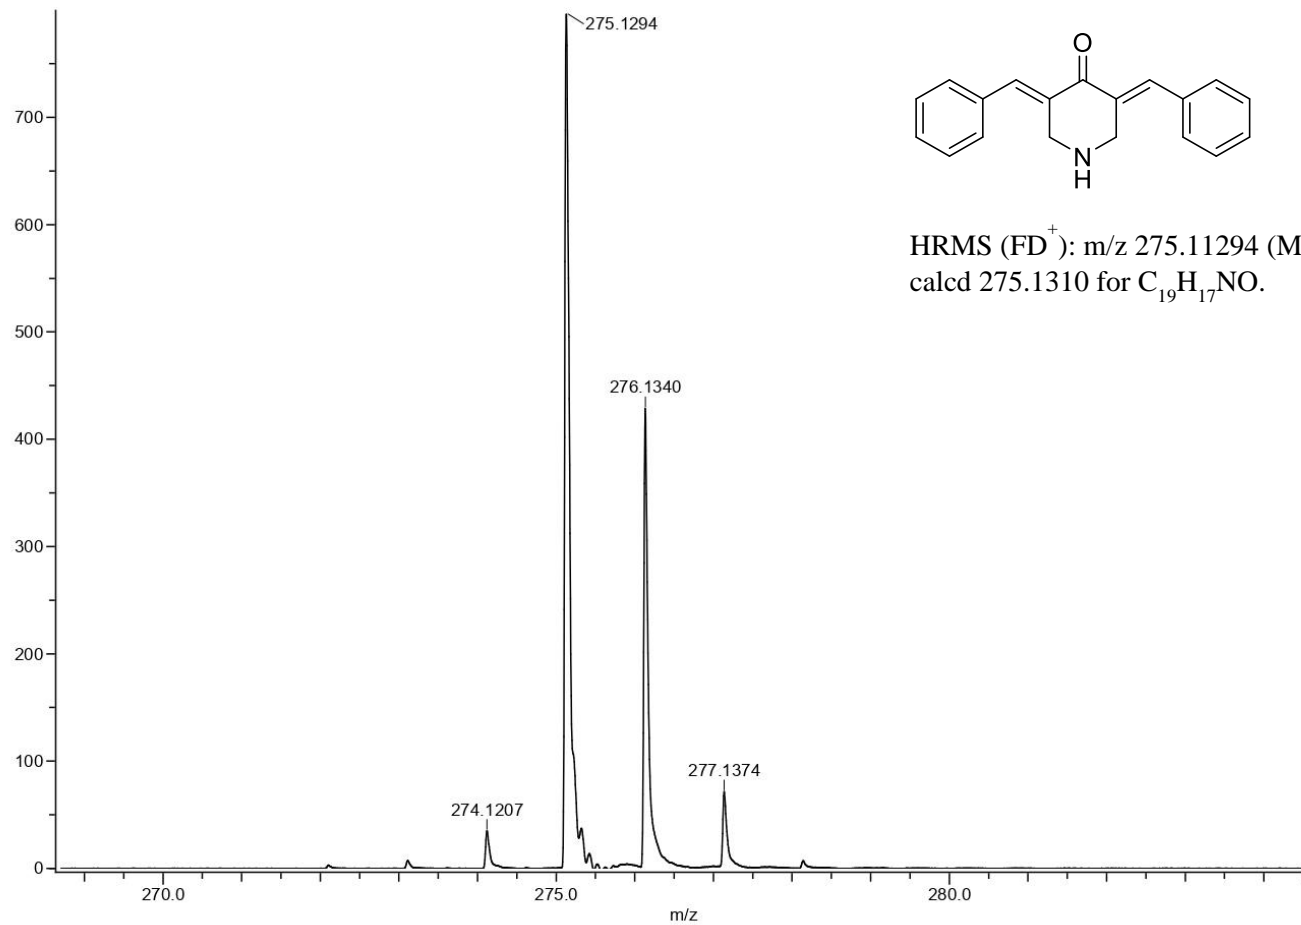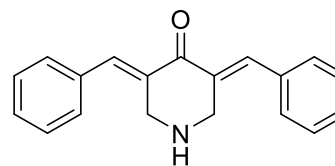

HRMS (FD<sup>+</sup>): m/z 275.11294 (M<sup>+</sup>),  
calcd 275.1310 for C<sub>19</sub>H<sub>17</sub>NO.

$^1\text{H}$  NMR ( $(\text{CD}_3)_2\text{SO}$ ) of 1-acetyl-3,5-di((E)-benzylidene)piperidin-4-one (**2b**)

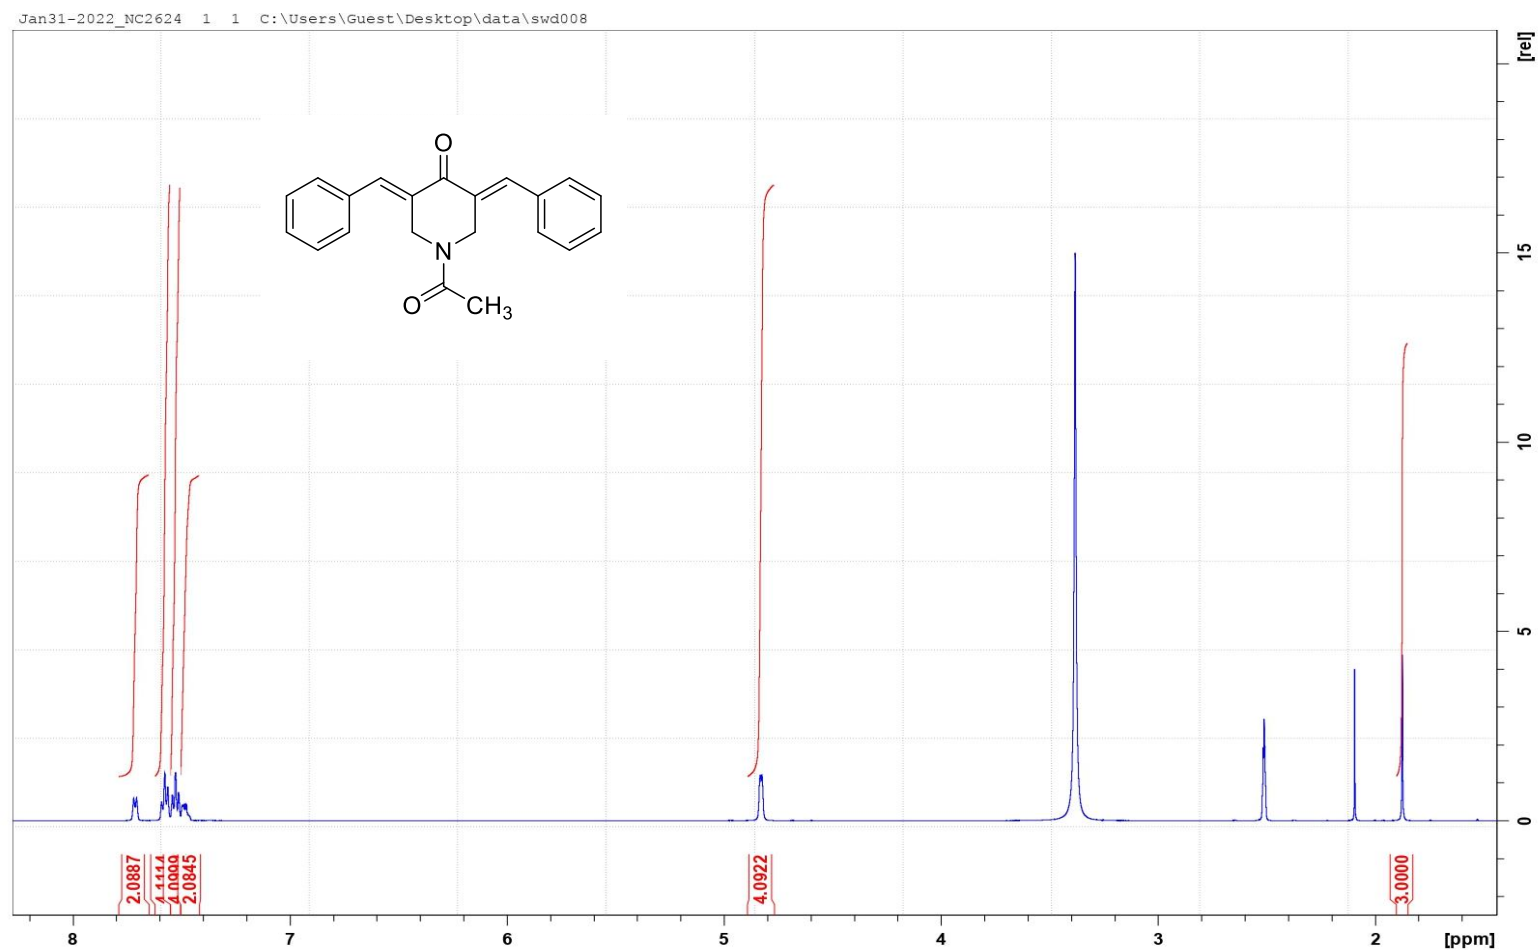

$^{13}\text{C}$  NMR ( $(\text{CD}_3)_2\text{SO}$ ) spectrum of 1-acetyl-3,5-di((E)-benzylidene)piperidin-4-one (**2b**)

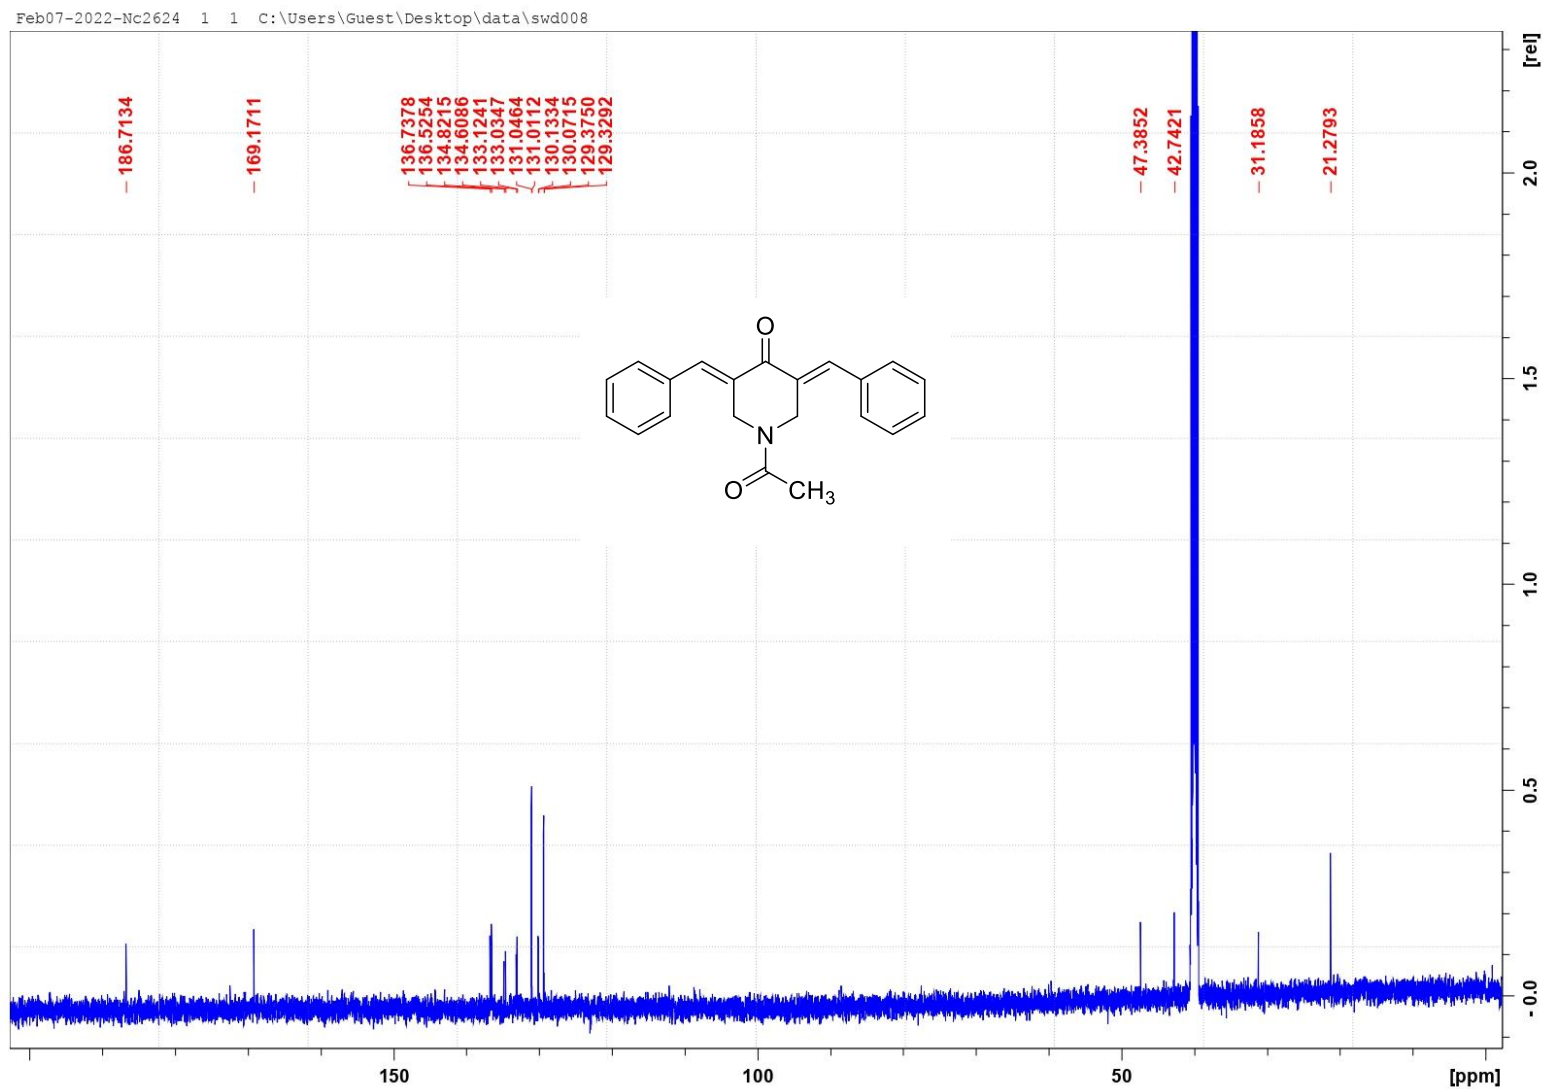

Mass spectrum of 1-acetyl-3,5-di((E)-benzylidene)piperidin-4-one (**2b**)

Acq. Data Name: NC2624  
Creation Parameters: Average(MS Time:0.20..0.33)  
x10<sup>3</sup> Intensity (217877)

Experiment Date/Time: 12/03/2019 8:56:24 AM  
Ionization Mode: FD+(eIFi)

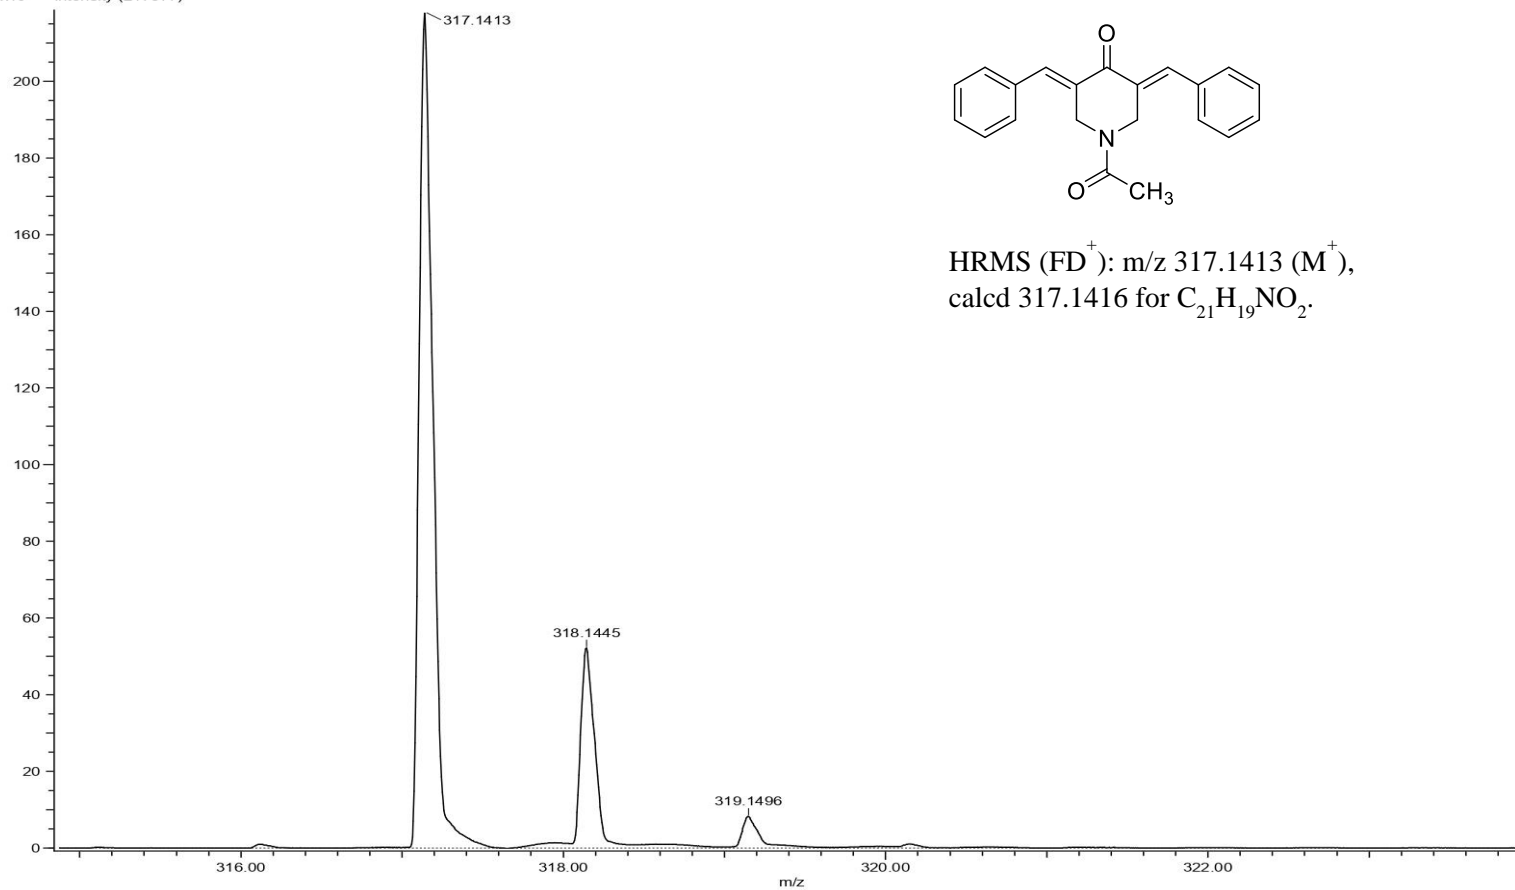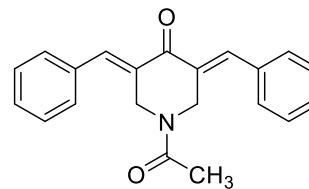

HRMS (FD<sup>+</sup>): m/z 317.1413 (M<sup>+</sup>),  
calcd 317.1416 for C<sub>21</sub>H<sub>19</sub>NO<sub>2</sub>.
